# Supplementary material for: Acceptorless dehydrogenative construction of CN and CC bonds through catalytic aza-Wittig and Wittig reactions in the presence of an air-stable ruthenium pincer complex
Source: Royal Society of Chemistry journal article supplement (doi:10.1039/c8dt04725a), 2019-01-01

# Supporting Information

## Acceptorless Dehydrogenative Construction of C=N and C=C bond through Catalytic Aza-Wittig and Wittig Reaction in the Presence of Air-stable Ruthenium Pincer Complex

Nandita Biswas, Kalicharan Das, Bitan Sardar and Dipankar Srimani\*

*Department of Chemistry, Indian Institute of Technology-Guwahati, Kamrup, Assam 781039, India. E-mail: dsrimani@iitg.ernet.in*

### List of contents

|   |                                                                                              |    |
|---|----------------------------------------------------------------------------------------------|----|
| 1 | Characterization data of Ligands and the corresponding Ru-pincer complexes (1-3) -----       | 2  |
| 2 | <sup>1</sup> H and <sup>13</sup> C NMR spectra of Aza-Wittig and Wittig reaction products -- | 14 |

# 1. Characterization data of Ligands and the corresponding Ru-pincer complexes (1-3):

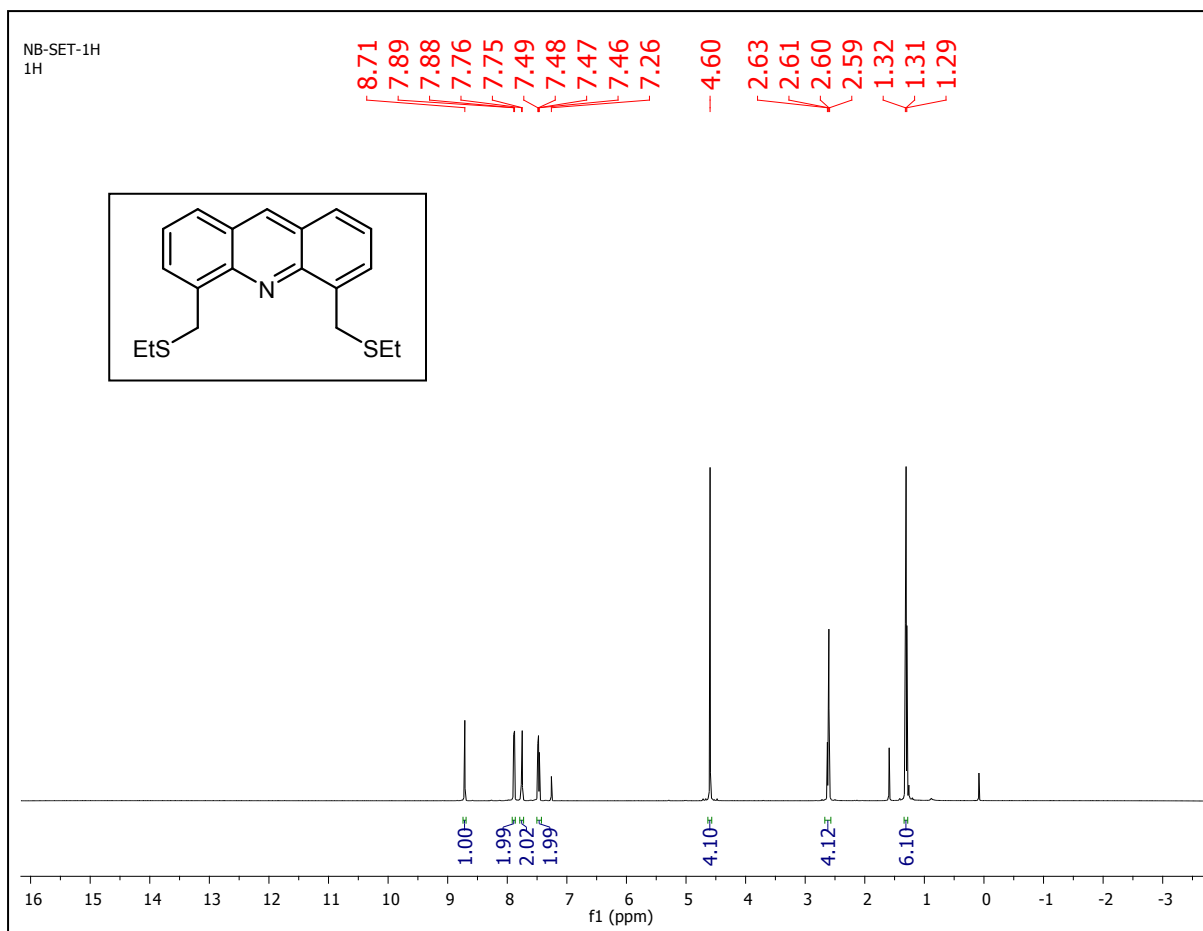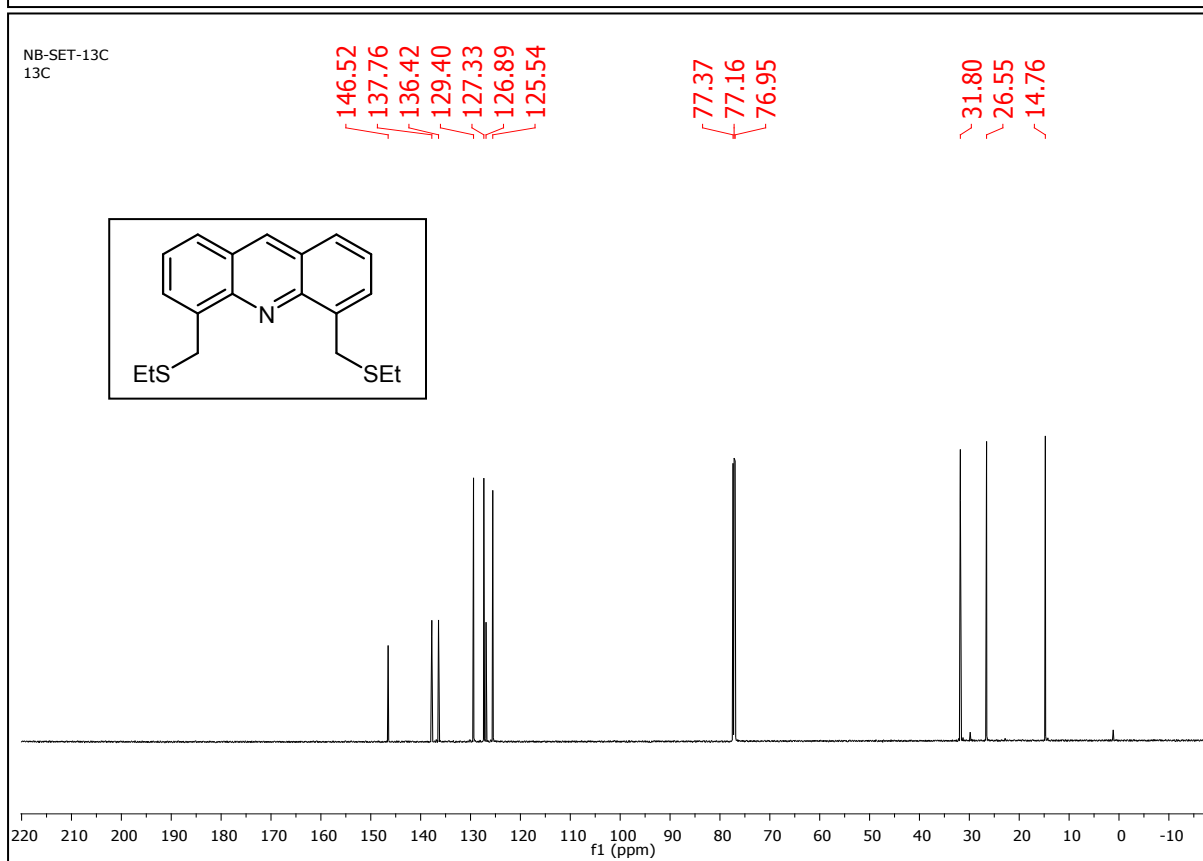

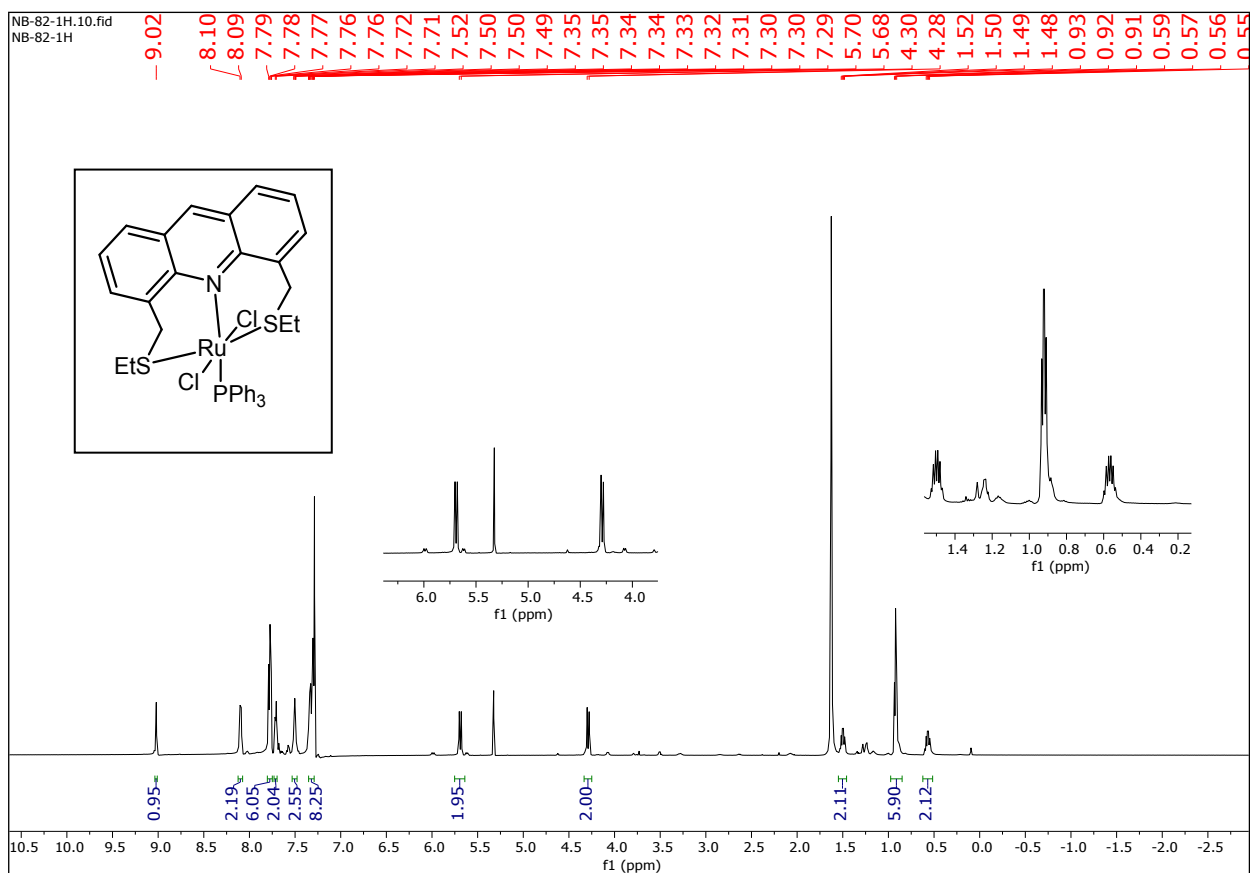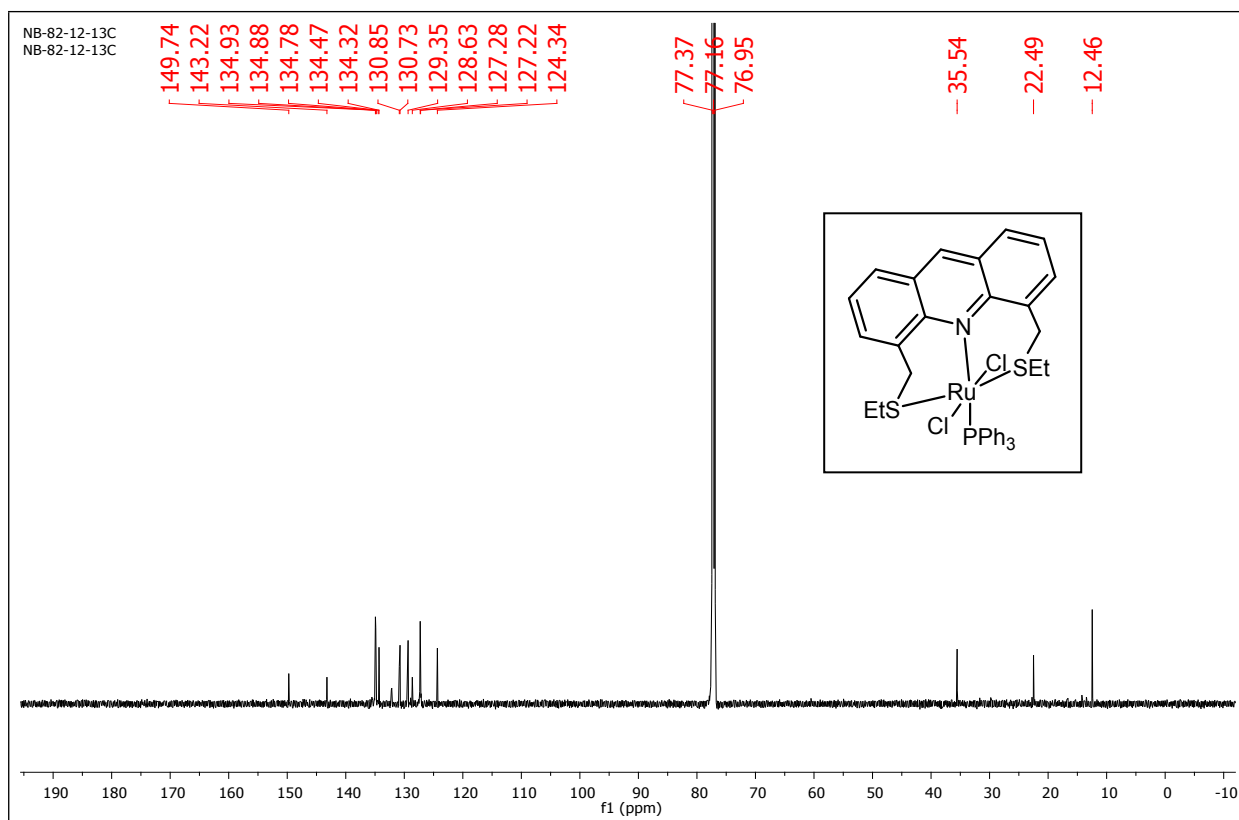

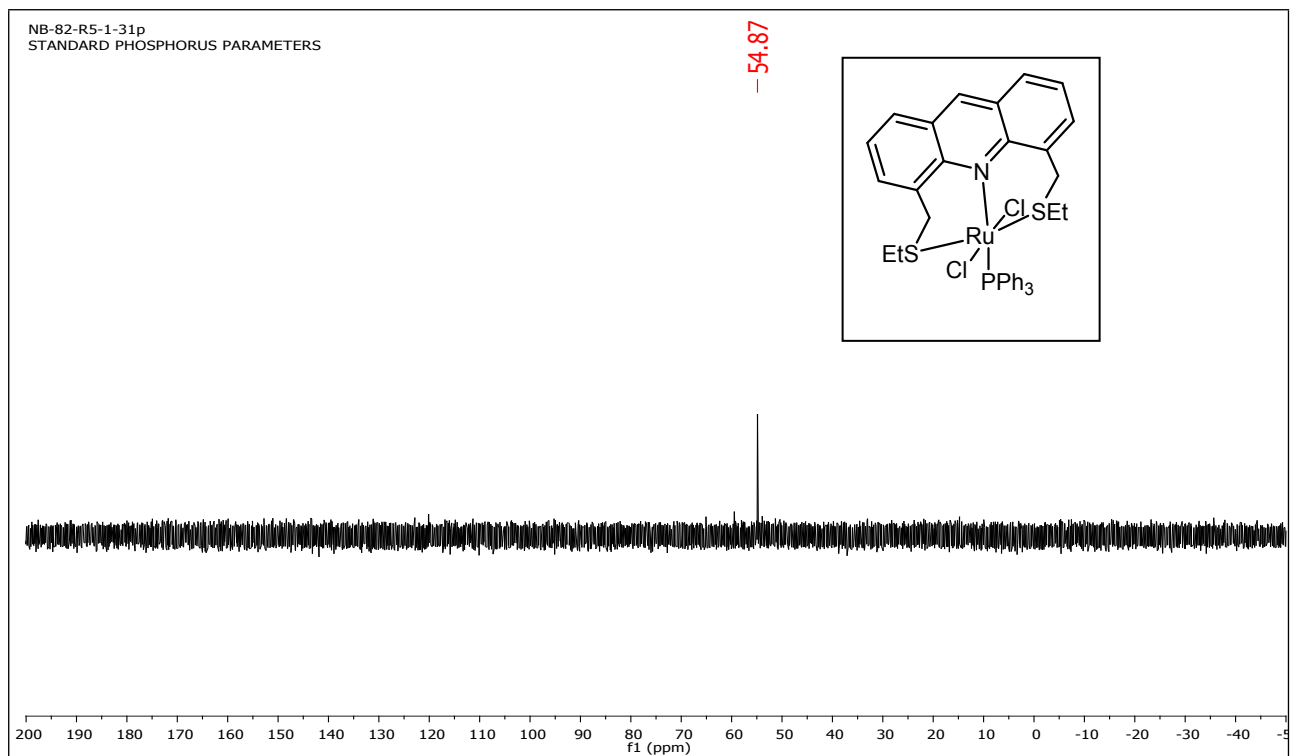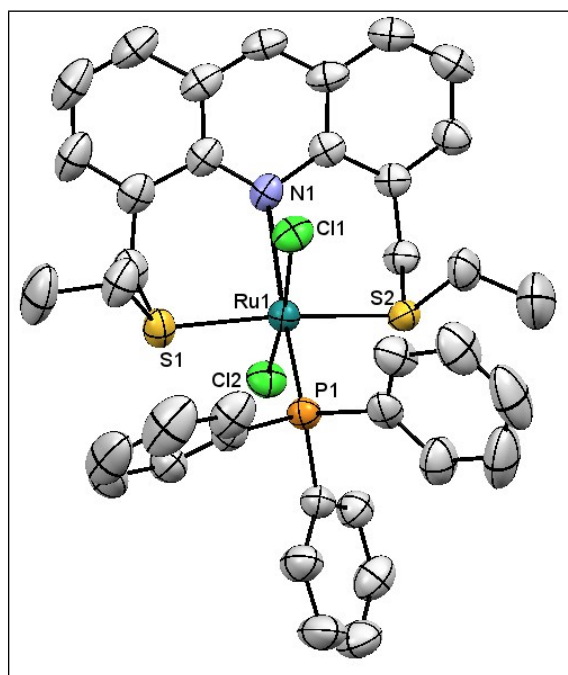

**Figure 1.** Molecular structure of **1** with thermal ellipsoids at 50% probability.

**Crystallographic data for complex 1:**

|                |                                   |
|----------------|-----------------------------------|
| Formula        | $C_{39} H_{39} Cl_2 N_2 P Ru S_2$ |
| Mol. wt.       | 802.78                            |
| Crystal system | Triclinic                         |
| Space group    | P -1                              |

|                                 |                                              |
|---------------------------------|----------------------------------------------|
| Temperature /K                  | 296(2)                                       |
| Wavelength /Å                   | 0.71073                                      |
| a /Å                            | 9.7186(6)                                    |
| b /Å                            | 11.8743(7)                                   |
| c /Å                            | 18.0974(11)                                  |
| $\alpha$ /°                     | 71.496(4)                                    |
| $\beta$ /°                      | 79.588(4)                                    |
| $\gamma$ /°                     | 79.316(4)                                    |
| V/ Å <sup>3</sup>               | 1929.4(2)                                    |
| Z                               | 2                                            |
| Density/Mgm <sup>-3</sup>       | 1.382                                        |
| Abs. Coeff. /mm <sup>-1</sup>   | 0.724                                        |
| Abs. correction                 | MULTI-SCAN                                   |
| F(000)                          | 824                                          |
| Total no. of reflections        | 18723                                        |
| Reflections, I > 2 $\sigma$ (I) | 4342                                         |
| Max. 2 $\theta$ /°              | 25.00                                        |
| Ranges (h, k, l)                | -11 ≤ h ≤ 11<br>-14 ≤ k ≤ 13<br>-21 ≤ l ≤ 20 |
| Complete to 2 $\theta$ (%)      | 98.9                                         |
| Refinement method               | Full-matrix least-squares on F <sup>2</sup>  |
| Goof (F <sup>2</sup> )          | 1.033                                        |
| R indices [I > 2 $\sigma$ (I)]  | 0.0633                                       |
| R indices (all data)            | 0.0900                                       |

**Table 1.** Selected bond lengths and angles:

| <b>Bond Distances [Å]</b> |             | <b>Bond angles [°]</b> |            |
|---------------------------|-------------|------------------------|------------|
| Ru1 N1                    | 12.561(5)   | P1 Ru1 N1              | 170.02(12) |
| Ru1 P1                    | 2.2587(16)  | S1 Ru1 N1              | 89.53(12)  |
| Ru1 S1                    | 2.3394(16)  | S2 Ru1 N1              | 90.43(12)  |
| Ru1 S2                    | 2.3210 (16) | Cl1 Ru1 N1             | 76.51(12)  |
| Ru1 Cl1                   | 2.3989(16)  | Cl2 Ru1 N1             | 93.22(12)  |
| Ru1 Cl2                   | 2.4317(16)  | Cl1 Ru1 Cl2            | 169.47(6)  |
|                           |             | P1 Ru1 S1              | 92.60(6)   |
|                           |             | S2 Ru1 S1              | 167.27(6)  |
|                           |             | P1 Ru1 S2              | 89.63(6)   |
|                           |             | P1 Ru1 Cl1             | 93.59(6)   |
|                           |             | S2 Ru1 Cl1             | 98.06(6)   |
|                           |             | S1 Ru1 Cl1             | 94.32(6)   |
|                           |             | P1 Ru1 Cl2             | 96.72(6)   |
|                           |             | S2 Ru1 Cl2             | 84.13(6)   |
|                           |             | S1 Ru1 Cl2             | 83.16(6)   |

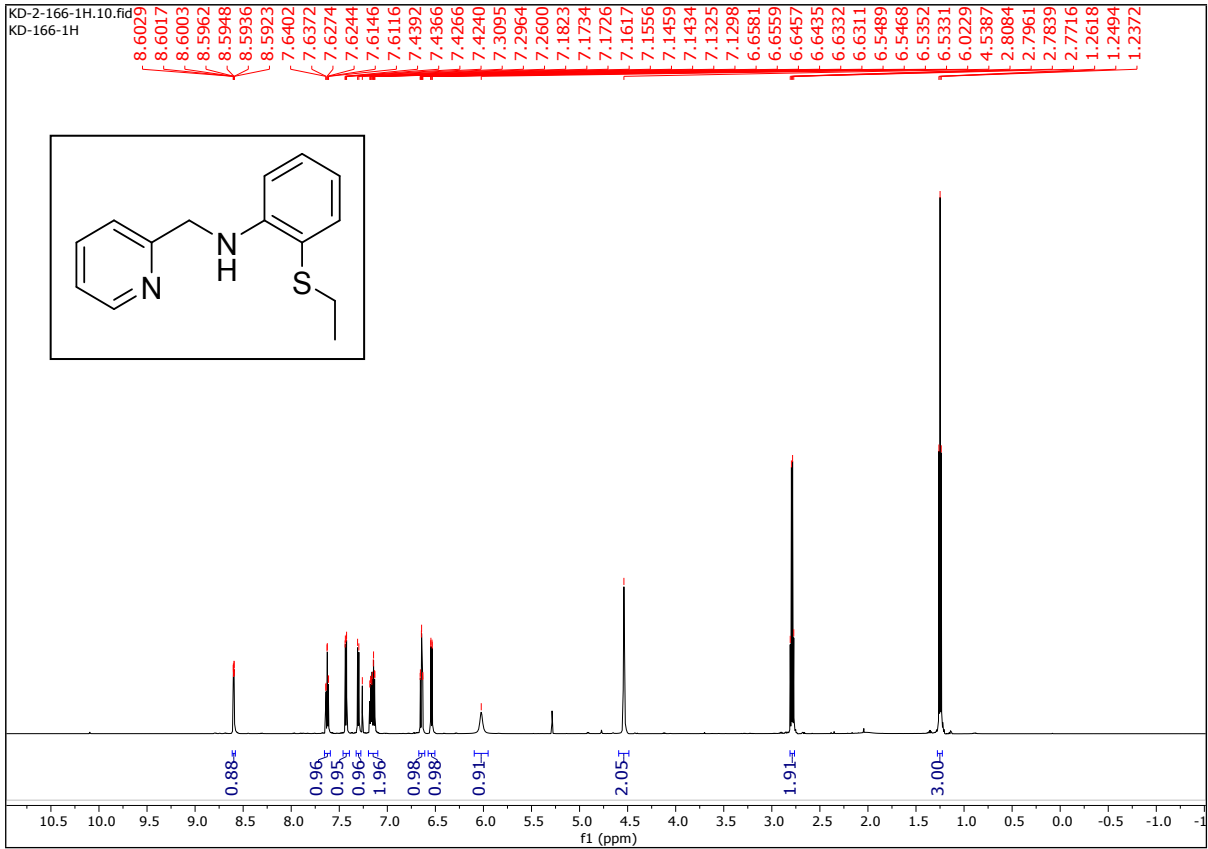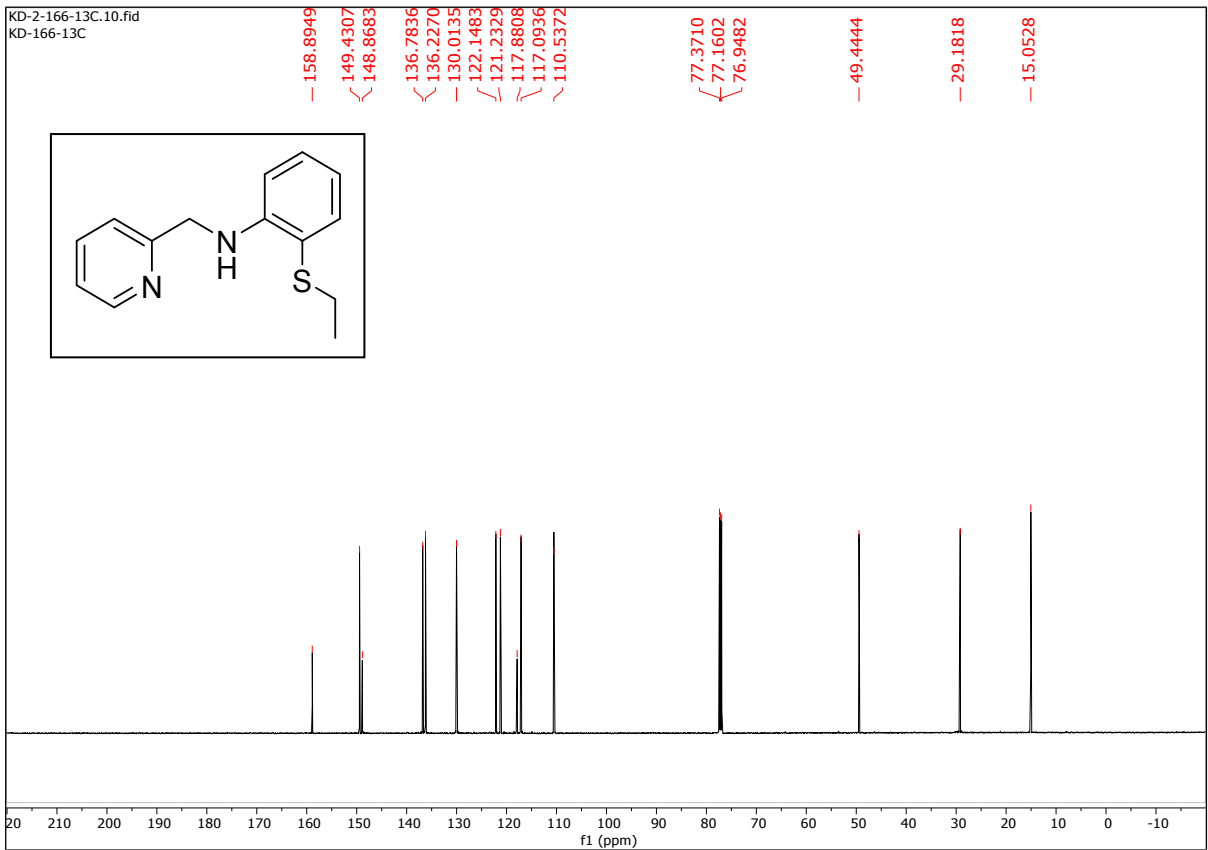

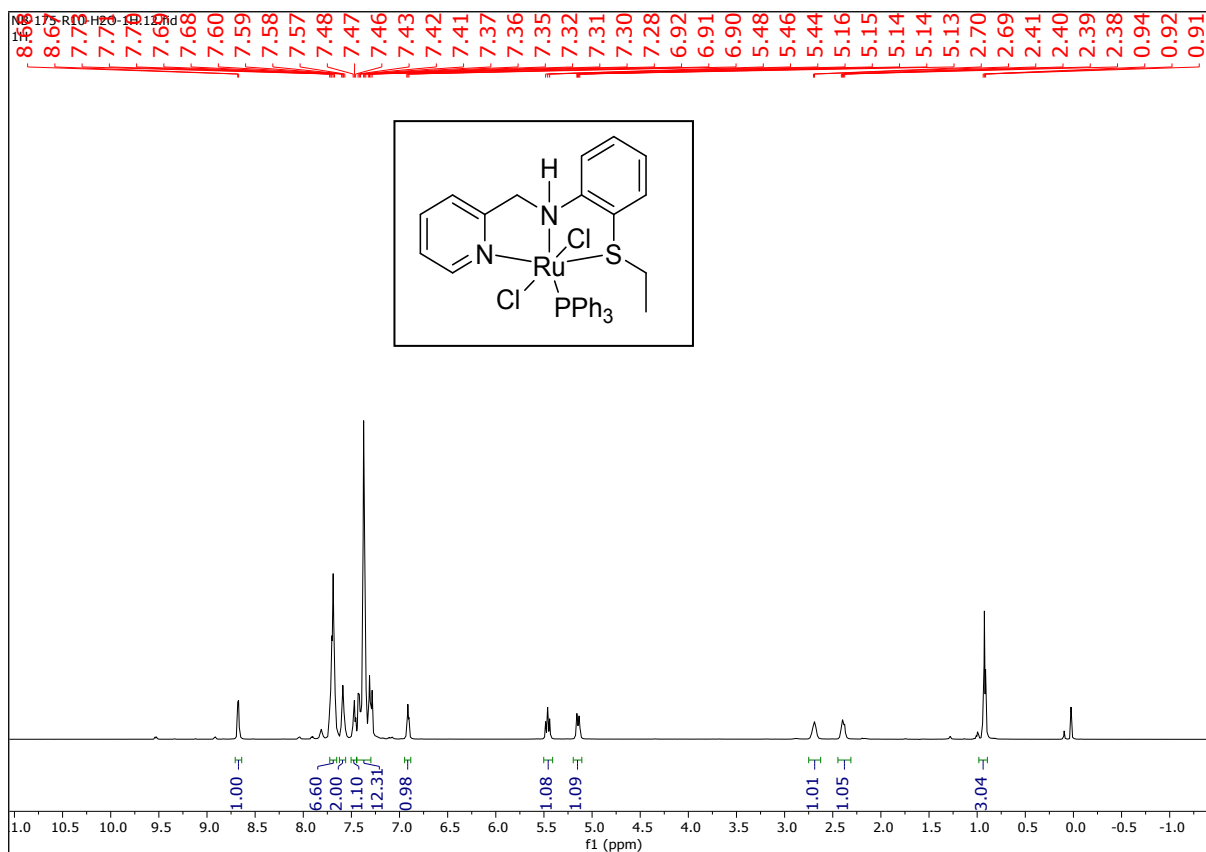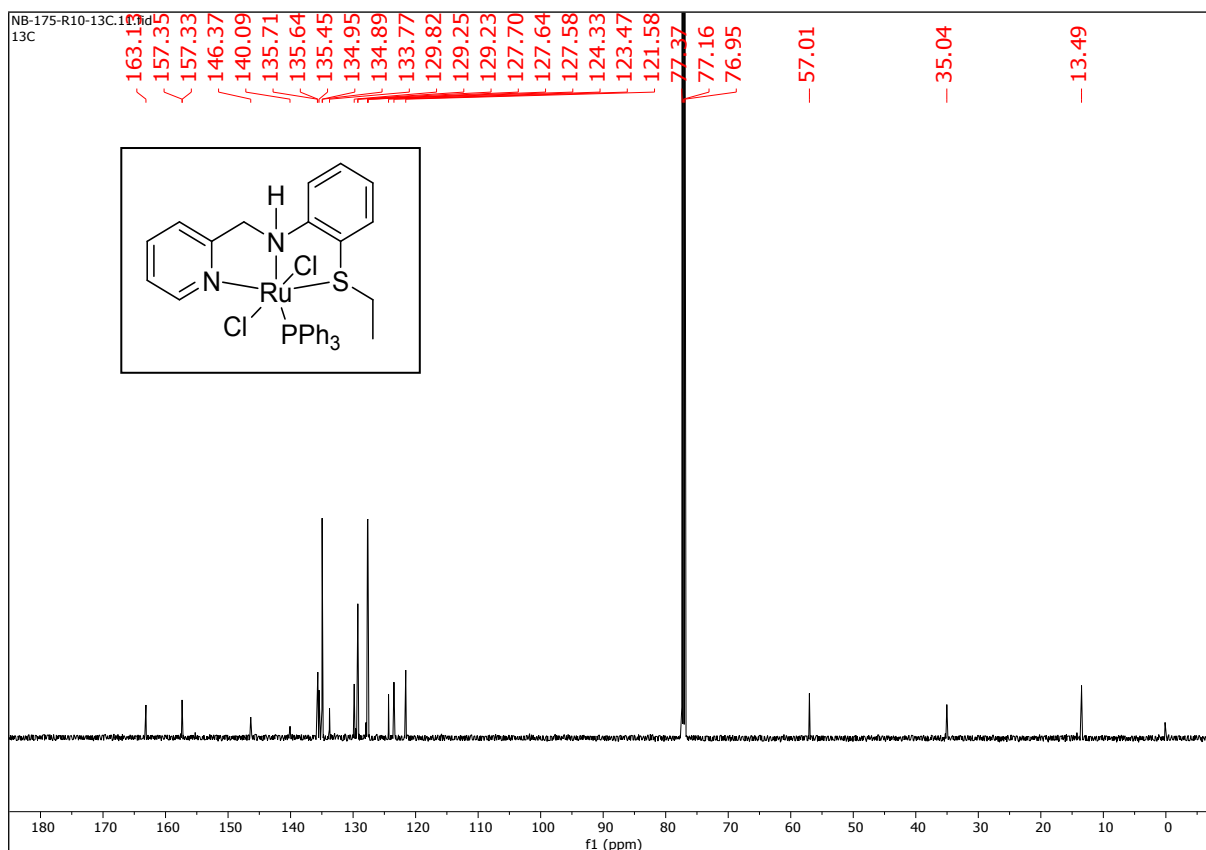

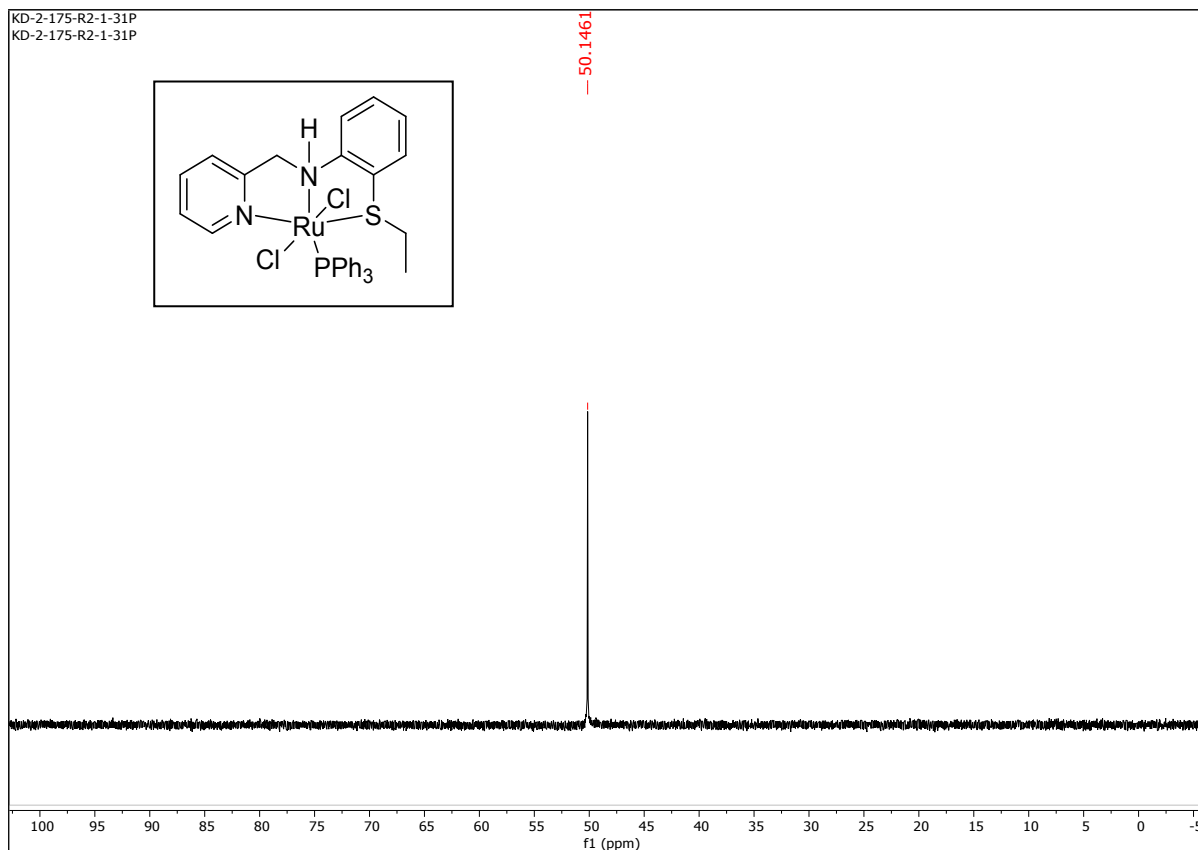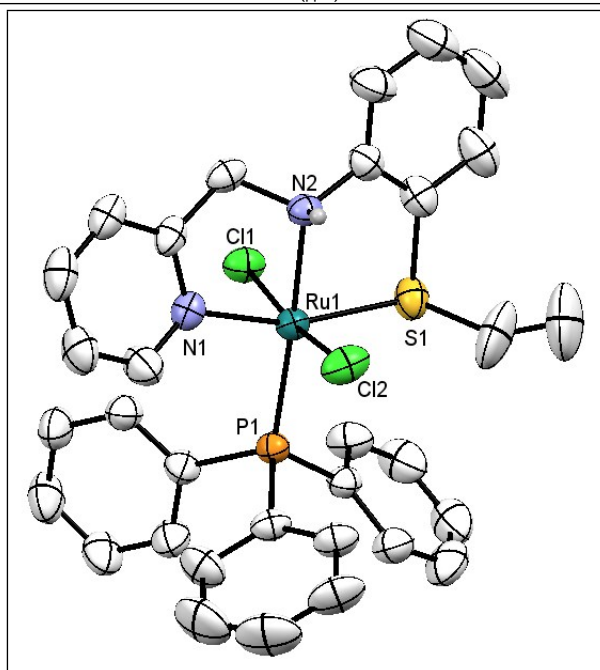

**Figure 2.** Molecular structure of **2** with thermal ellipsoids at 30% probability.

**Crystallographic data for complex 2:**

|                   |                                                                                                                                |
|-------------------|--------------------------------------------------------------------------------------------------------------------------------|
| Empirical formula | C <sub>68</sub> H <sub>72</sub> Cl <sub>4</sub> N <sub>4</sub> O P <sub>2</sub> Ru <sub>2</sub> S <sub>2</sub> C <sub>68</sub> |
| Formula weight    | 1431.30                                                                                                                        |
| Temperature, T    | 293 K                                                                                                                          |
| Crystal system    | Triclinic                                                                                                                      |



|                                               |                                                                                                                |
|-----------------------------------------------|----------------------------------------------------------------------------------------------------------------|
| Space group                                   | P-1                                                                                                            |
| Unit cell dimensions                          | a= 10.1370(4) Å      α= 73.196(2)°<br>b= 11.4066(4) Å      β= 80.920(2)°<br>c= 16.0632(6) Å      γ= 67.294(2)° |
| Volume, V (Å <sup>3</sup> )                   | 1638.01(11)                                                                                                    |
| Z                                             | 1                                                                                                              |
| Density (calculated), Mg·m <sup>-3</sup>      | 1.451                                                                                                          |
| Absorption coefficient, μ (mm <sup>-1</sup> ) | 0.782                                                                                                          |
| F(000)                                        | 734.0                                                                                                          |
| Crystal size, mm <sup>3</sup>                 | 0.32 × 0.28 × 0.19                                                                                             |
| Theta range for data collection               | 0.997 to 24.75                                                                                                 |
| Index ranges                                  | -11 ≤ h ≤ 11, -12 ≤ k ≤ 13, -18 ≤ l ≤ 18                                                                       |
| Reflections collected                         | 4204                                                                                                           |
| Independent reflections                       | 5581                                                                                                           |
| Completeness to theta                         | 0.997                                                                                                          |
| Absorption correction                         | none                                                                                                           |
| Max. and min. transmission                    | 0.862 to 0.779                                                                                                 |
| Refinement method                             | 'SHELXL-97(Sheldrick, 1997)'                                                                                   |
| Data / restraints / parameters                | 5581 / 6/388                                                                                                   |
| Goodness-of-fit on F <sup>2</sup>             | 0.909                                                                                                          |
| Final R indices [I>2sigma(I)]                 | R1 = 0.0473( 3792), wR=0.1146( 5581)                                                                           |
| R indices (all data)                          | R1 = 0.0730, wR=0.0975                                                                                         |
| Extinction coefficient                        | 0.782                                                                                                          |
| Largest diff. peak and hole                   | 1.089 and -0.549 e·Å <sup>-3</sup>                                                                             |

**Selected bond length and bond angle:**

| Bond lengths [Å]   | Bond angles [°]      |
|--------------------|----------------------|
| Ru1 N1 2.078(4)    | N1 Ru1 N2 78.49(16)  |
| Ru1 N2 2.124(4)    | N1 Ru1 P1 98.45(13)  |
| Ru1 P1 2.2967(14)  | N2 Ru1 P1 176.93(12) |
| Ru1 S1 2.3214(15)  | N1 Ru1 S1 162.58(13) |
| Ru1 Cl2 2.3935(15) | N2 Ru1 S1 84.42(12)  |
| Ru1 Cl1 2.4227(15) | P1 Ru1 S1 98.65(5)   |
|                    | N1 Ru1 Cl2 85.61(12) |
|                    | N2 Ru1 Cl2 84.37(12) |
|                    | P1 Ru1 Cl2 95.20(5)  |

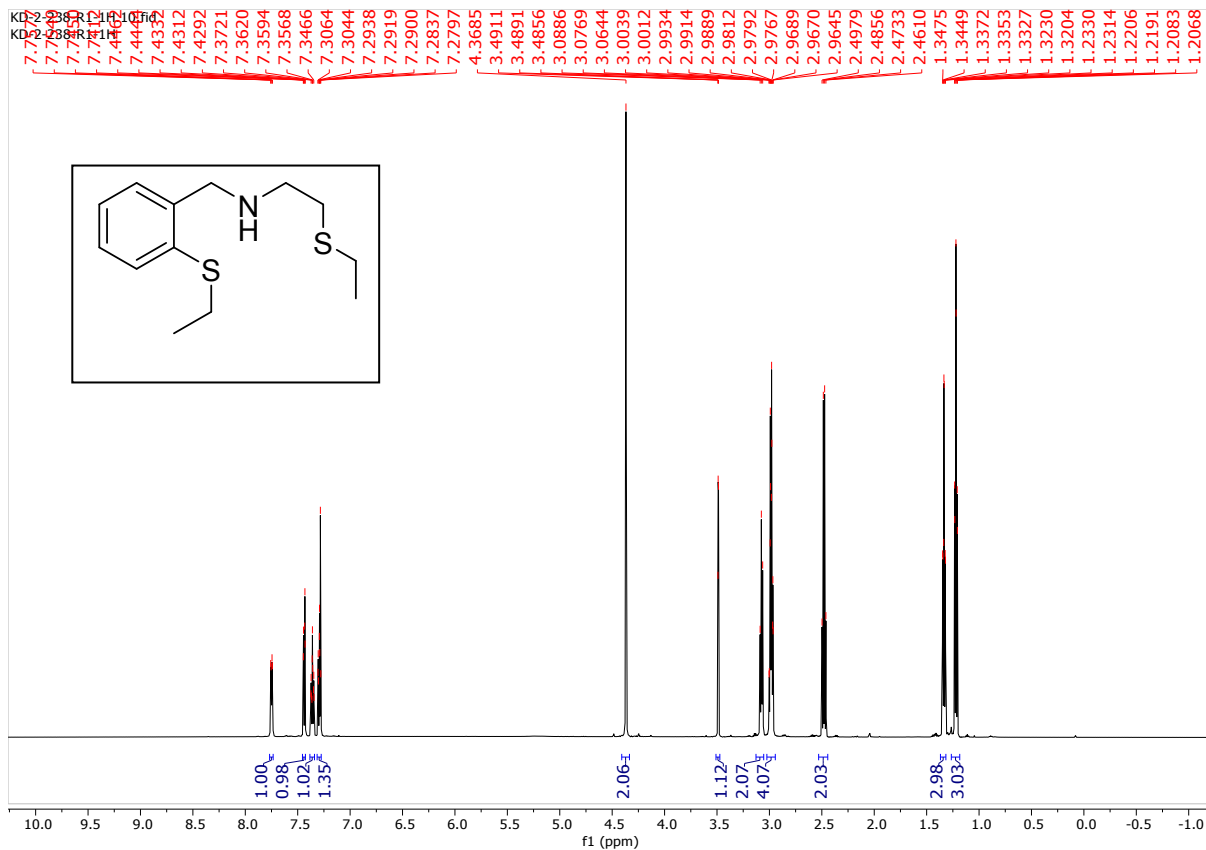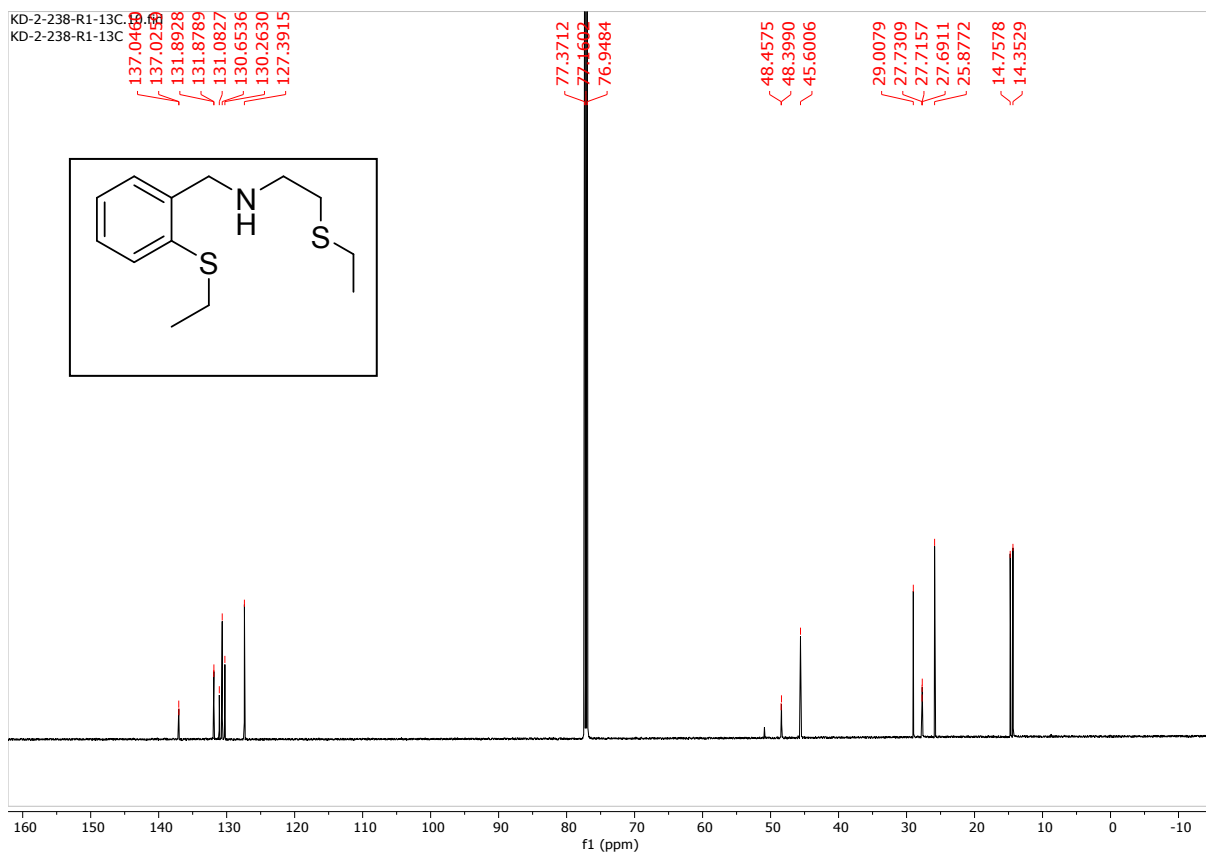

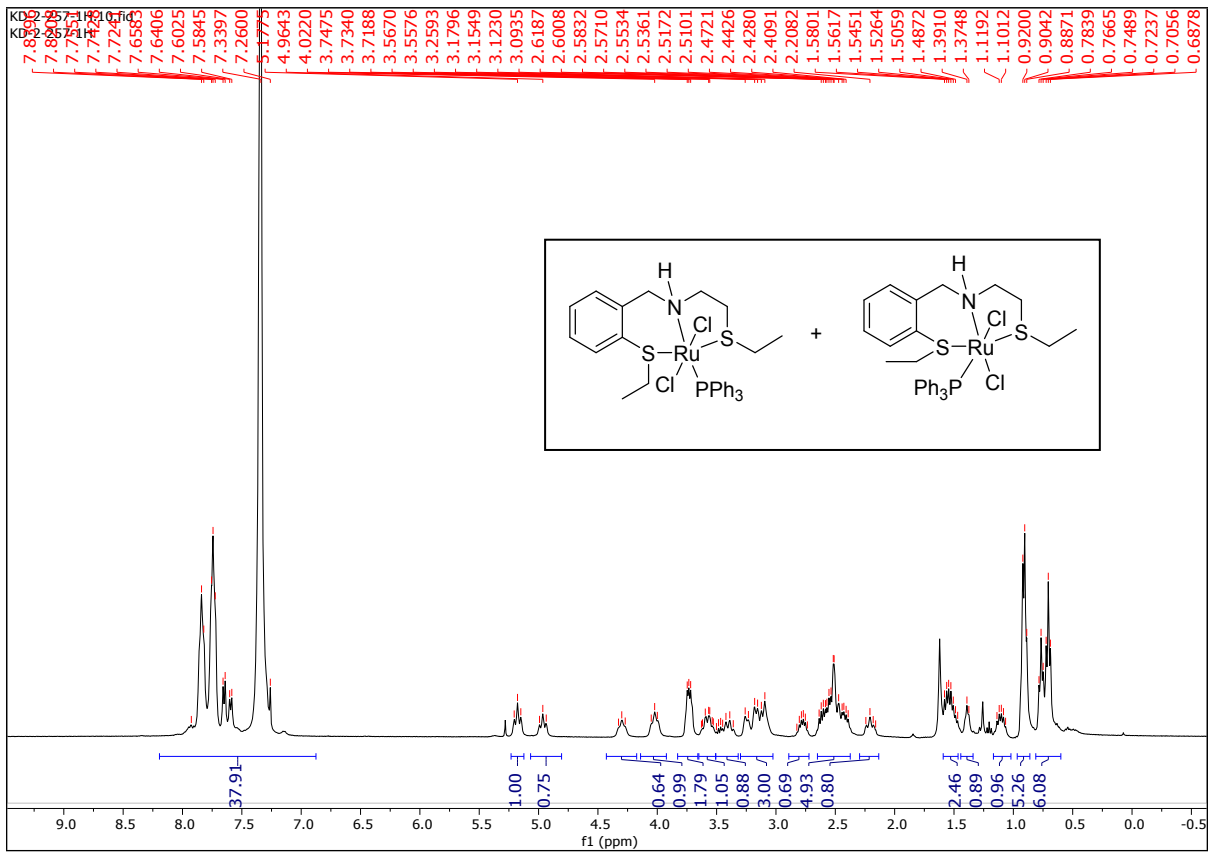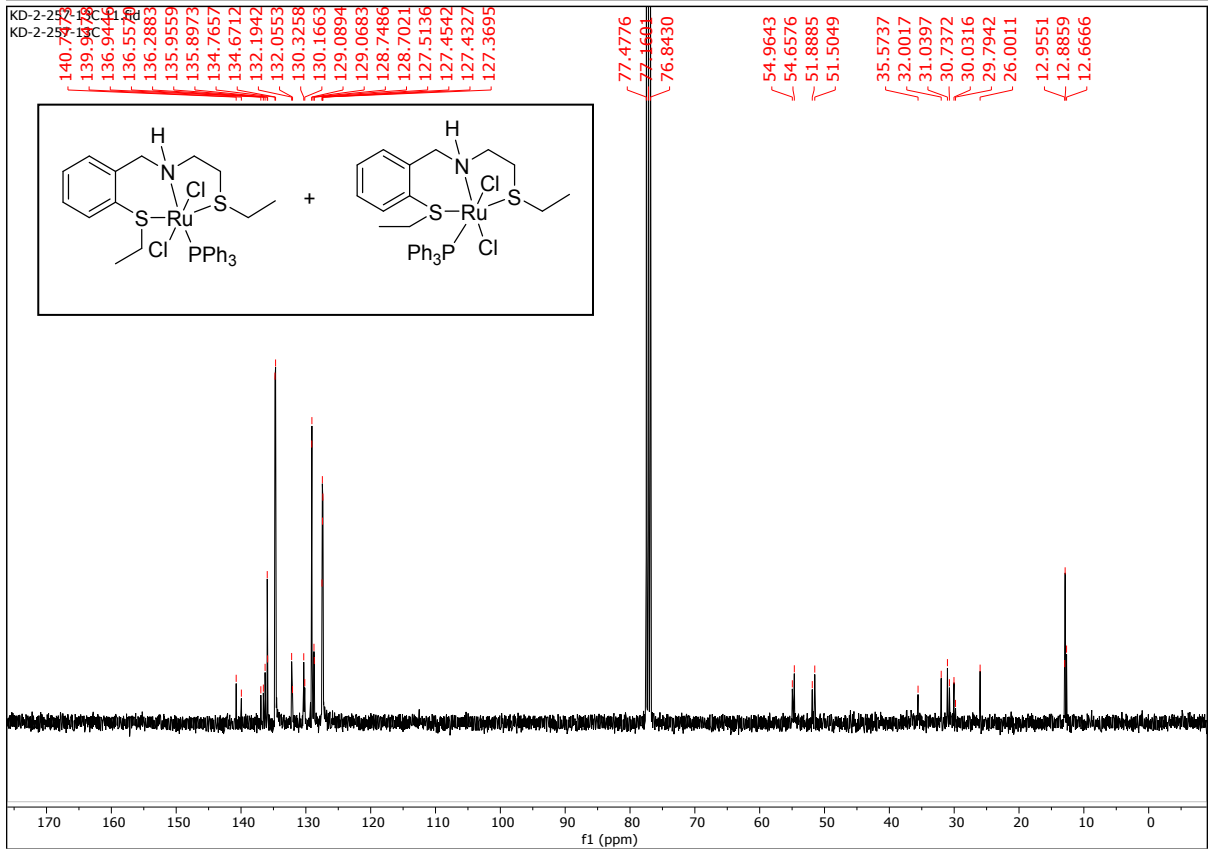

KD-2-257-31P  
KD-2-257-31P

— 45.2302  
— 43.4119

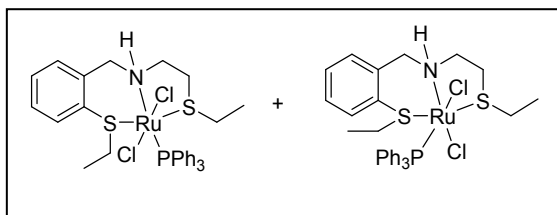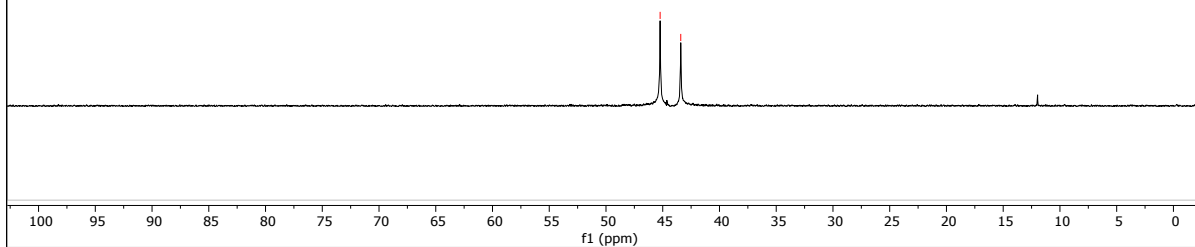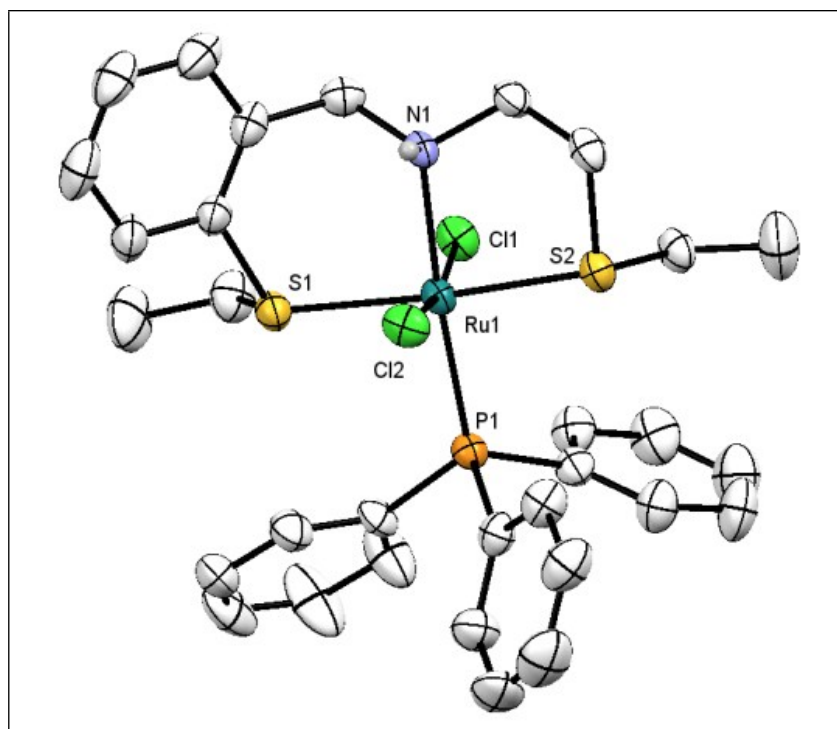

**Figure 3.** Molecular structure of **3** with thermal ellipsoids at 30% probability.

**Crystallographic data for complex 3:**

|                                               |                                                                                                                                                                   |
|-----------------------------------------------|-------------------------------------------------------------------------------------------------------------------------------------------------------------------|
| Empirical formula                             | C31 H36 Cl2 N P Ru S2                                                                                                                                             |
| Formula weight                                | 689.67                                                                                                                                                            |
| Temperature, T                                | 293 K                                                                                                                                                             |
| Crystal system                                | triclinic                                                                                                                                                         |
| Space group                                   | P -1                                                                                                                                                              |
| Unit cell dimensions                          | a= 10.7565(6) Å                      α= 90.215(5) °<br>b= 12.0194(7) Å                      β= 92.041(5) °<br>c= 12.7360(8) Å                      γ=107.252(5) ° |
| Volume, V (Å <sup>3</sup> )                   | 1571.34(16)                                                                                                                                                       |
| Z                                             | 2                                                                                                                                                                 |
| Density (calculated), Mg·m <sup>-3</sup>      | 1.458                                                                                                                                                             |
| Absorption coefficient, μ (mm <sup>-1</sup> ) | 0.874                                                                                                                                                             |
| F(000)                                        | 708.0                                                                                                                                                             |
| Crystal size, mm <sup>3</sup>                 | 0.34 × 0.30 × 0.27                                                                                                                                                |
| Theta range for data collection               | 0.998 to 25.00                                                                                                                                                    |
| Index ranges                                  | -10 ≤ h ≤ 12, -14 ≤ k ≤ 14, -15 ≤ l ≤ 13                                                                                                                          |
| Reflections collected                         | 3007                                                                                                                                                              |
| Independent reflections                       | 5525                                                                                                                                                              |
| Completeness to theta                         | 0.998                                                                                                                                                             |
| Absorption correction                         | multi-scan                                                                                                                                                        |
| Max. and min. transmission                    | 0.792 to 1.000                                                                                                                                                    |
| Refinement method                             | 'SHELXL-97(Sheldrick, 1997)'                                                                                                                                      |
| Data / restraints / parameters                | 5525 / 0/345                                                                                                                                                      |
| Goodness-of-fit on F <sup>2</sup>             | 0.977                                                                                                                                                             |
| Final R indices [I>2σ(I)]                     | R1 = 0.0492( 4271), wR=0.1385( 5525)                                                                                                                              |
| R indices (all data)                          | R1 = 0.0705, wR=0.1196                                                                                                                                            |
| Extinction coefficient                        | 0.874                                                                                                                                                             |
| Largest diff. peak and hole                   | 1.098 and -0.566 e·Å <sup>-3</sup>                                                                                                                                |

**Selected bond length and bond angle:**

| Bond lengths [Å]   | Bond angles [°]      |
|--------------------|----------------------|
| Ru1 N1 2.179(4)    | N1 Ru1 P1 175.43(10) |
| Ru1 P1 2.3110(14)  | N1 Ru1 S2 84.13(10)  |
| Ru1 S2 2.3506(13)  | P1 Ru1 S2 91.32(5)   |
| Ru1 S1 2.3646(13)  | N1 Ru1 S1 90.08(10)  |
| Ru1 Cl1 2.4107(13) | P1 Ru1 S1 94.41(5)   |
| Ru1 Cl2 2.4299(13) | S2 Ru1 S1 171.28(5)  |
|                    | N1 Ru1 Cl1 86.79(11) |
|                    | P1 Ru1 Cl1 93.86(5)  |
|                    | S2 Ru1 Cl1 93.84(5)  |

## 2. $^1\text{H}$ and $^{13}\text{C}$ NMR spectra of Aza-Wittig and Wittig reaction products:

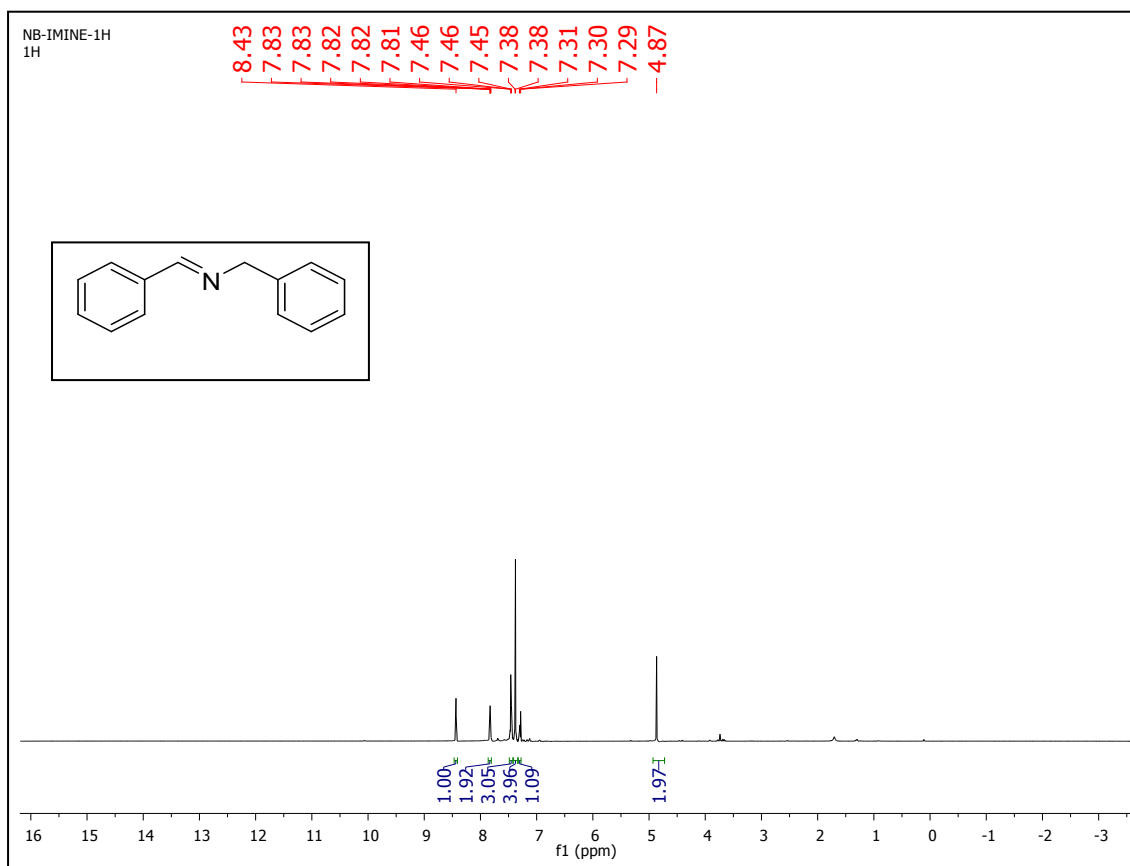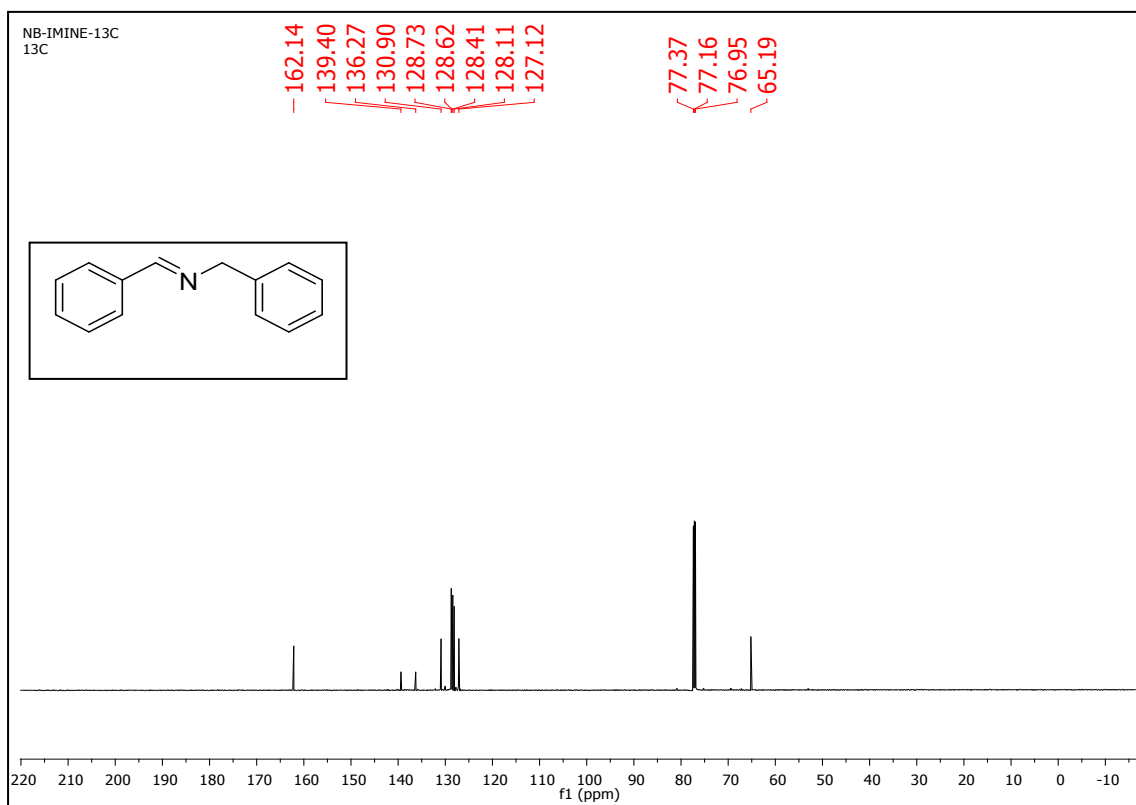

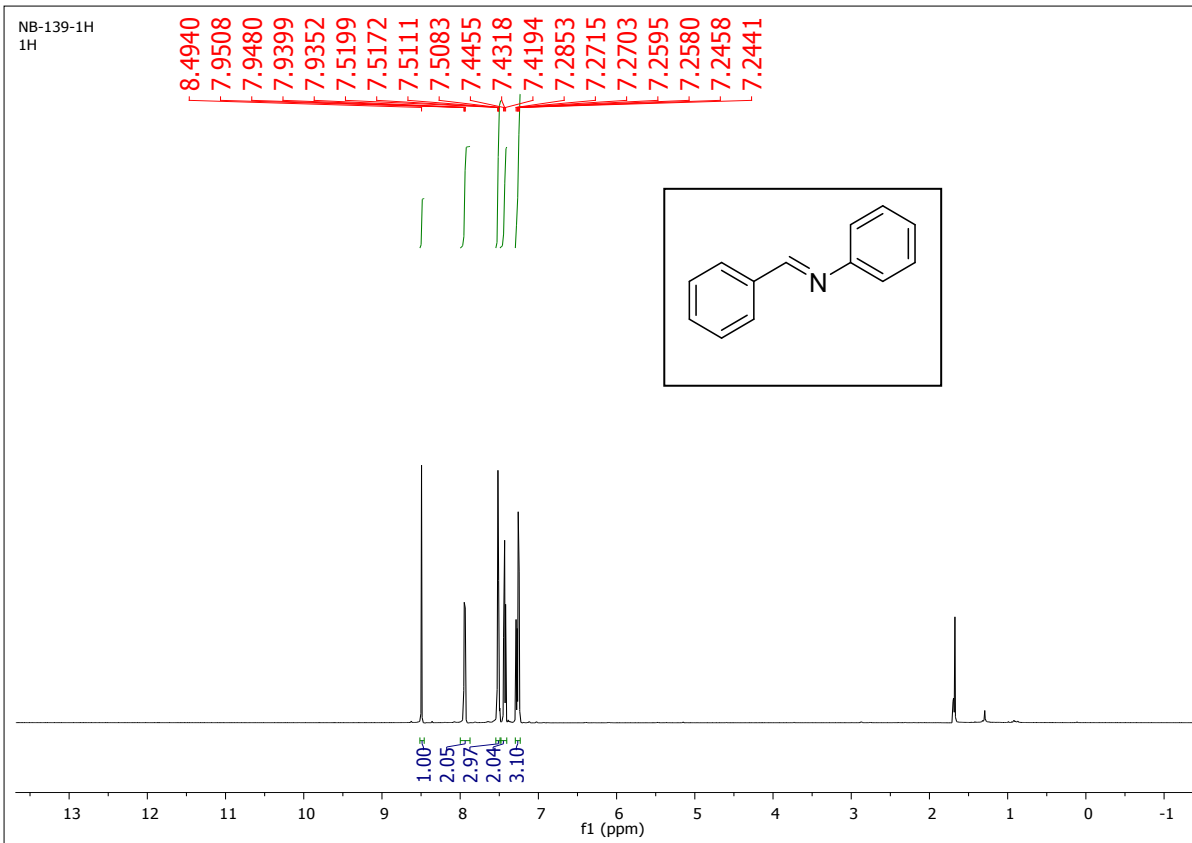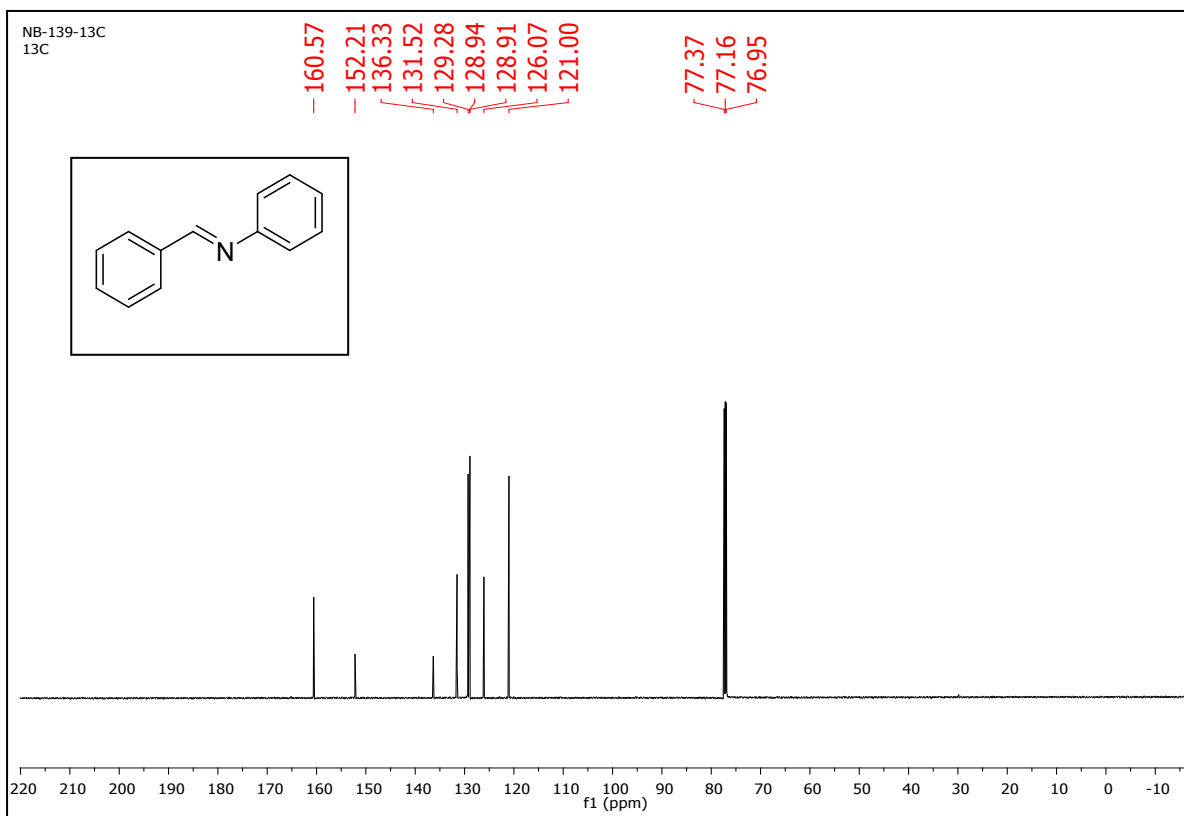

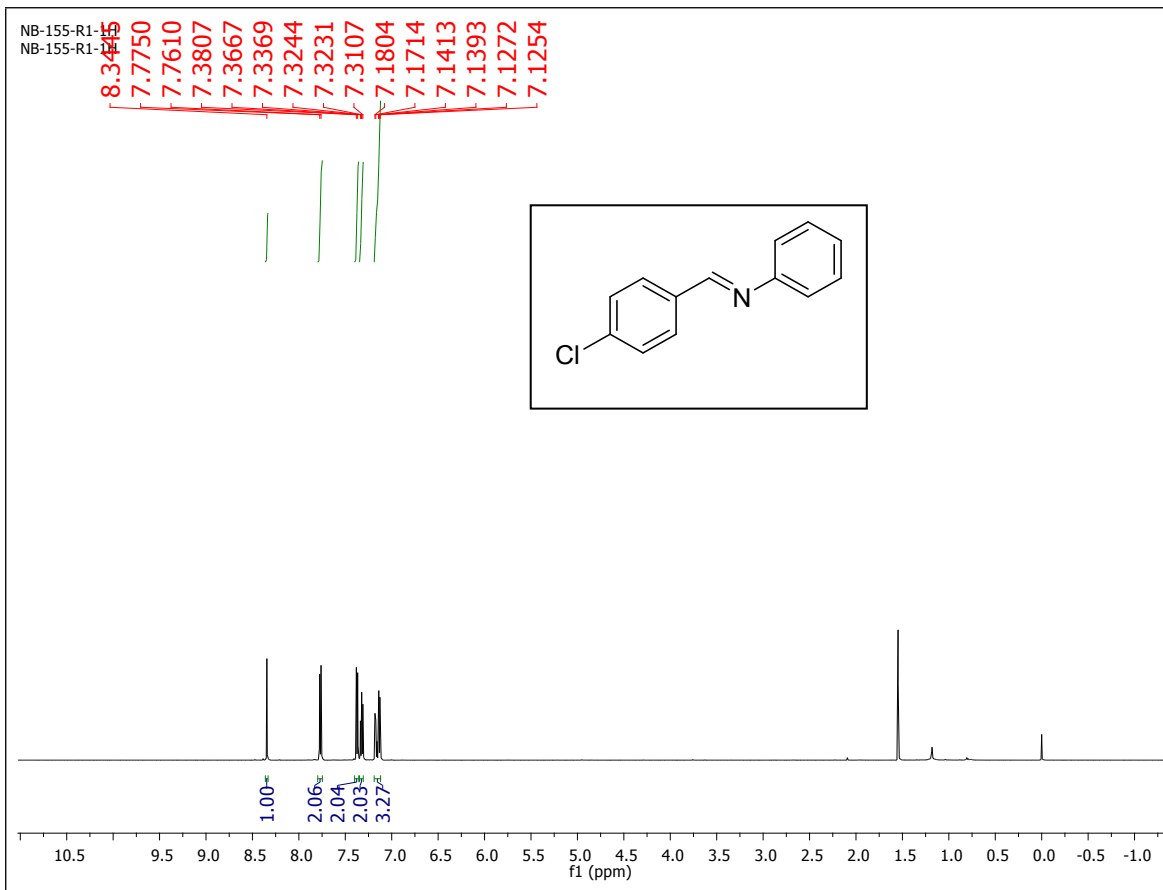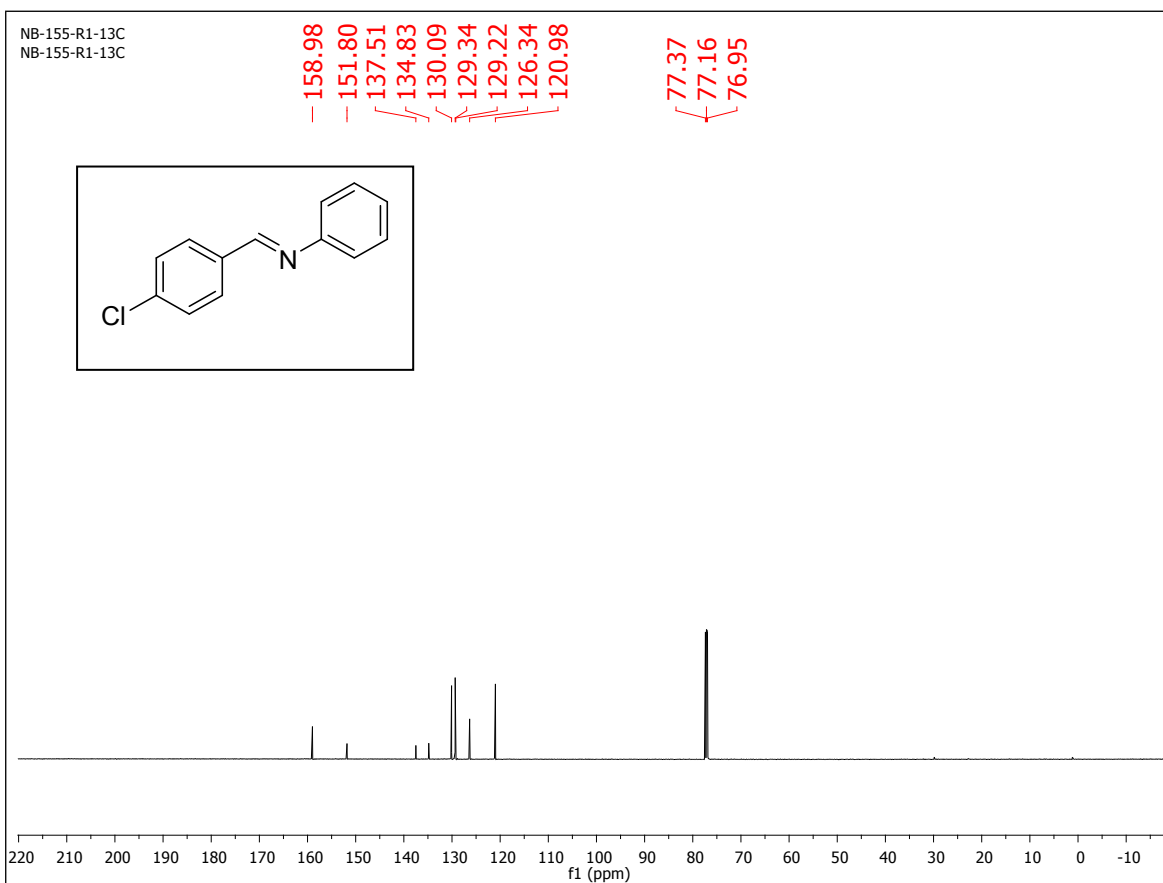



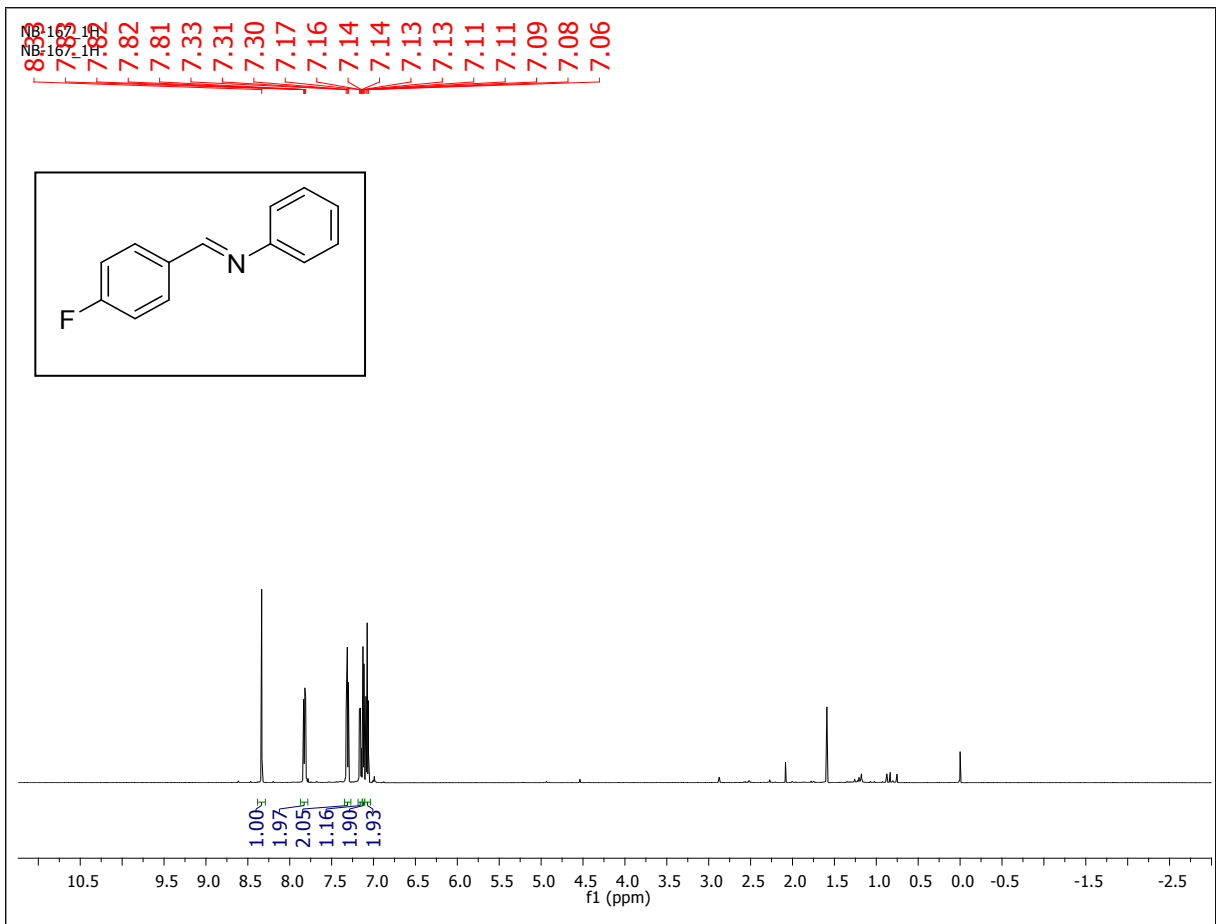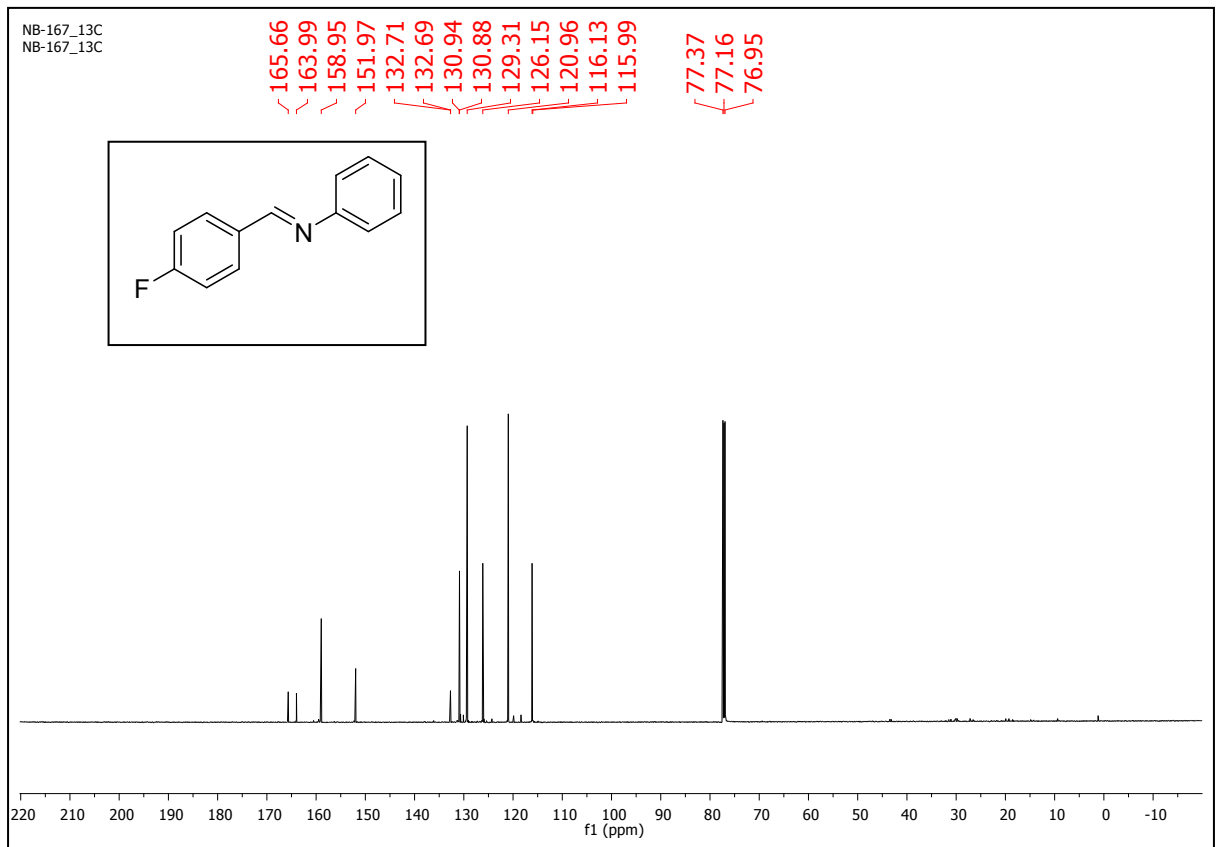

NB-147-R1-1H  
NB-147-R1-1H

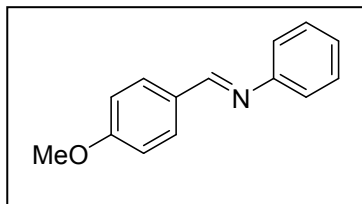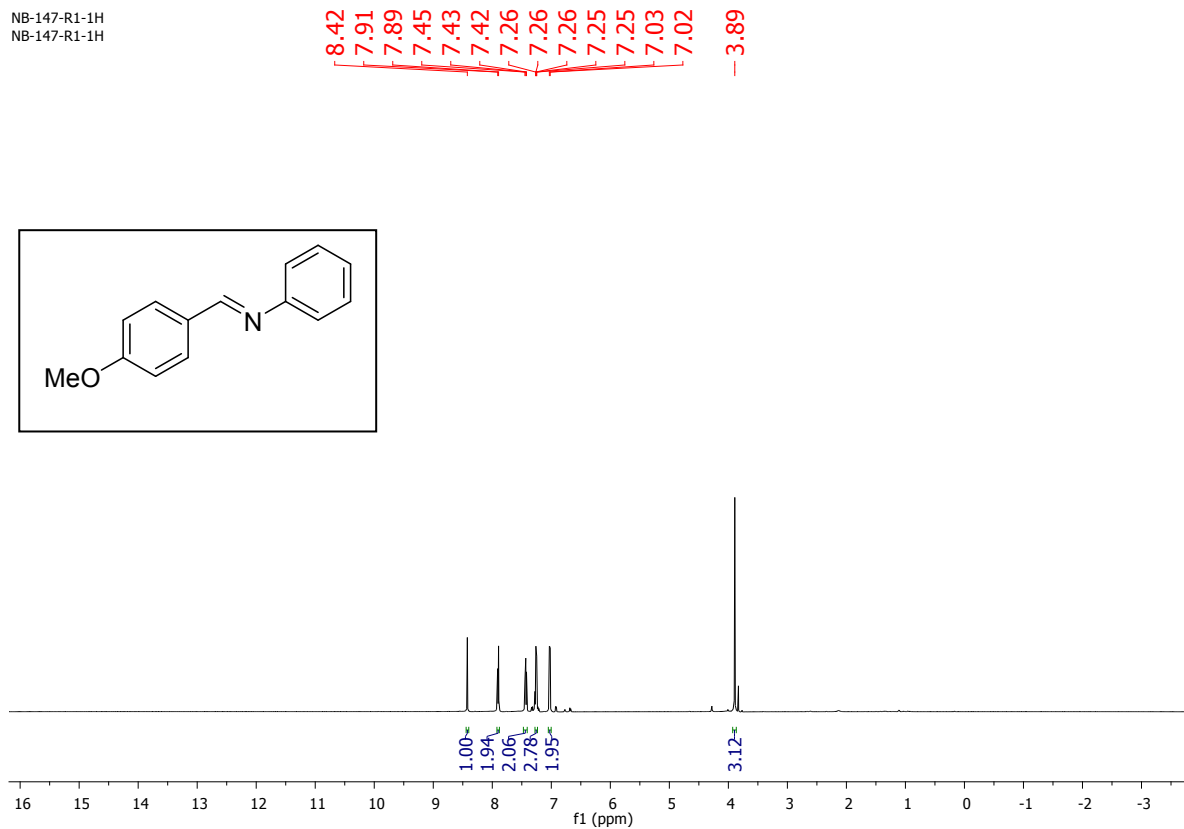

NB-147-R1-13C  
NB-147-R1-13C

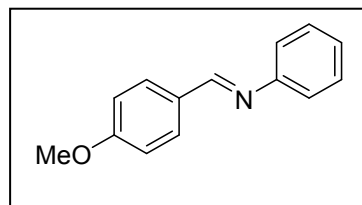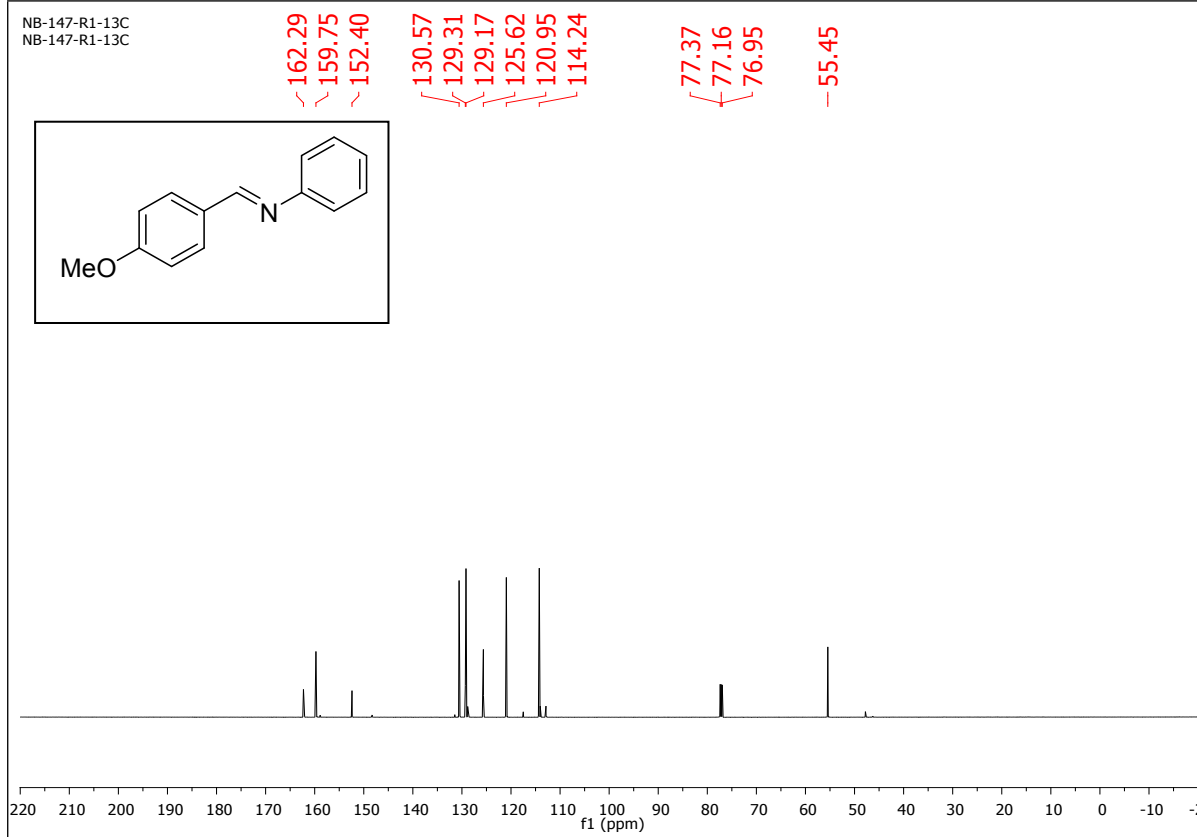

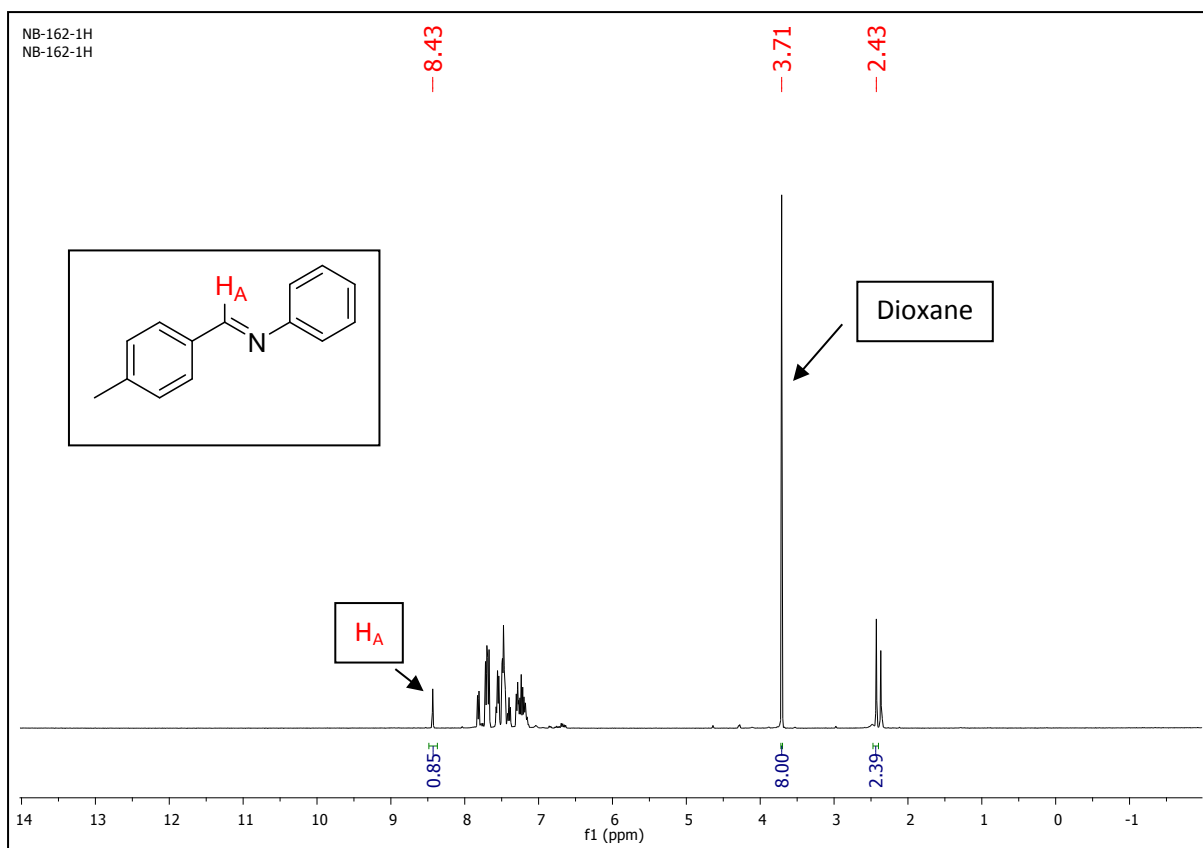

Reaction mixture of 4-methylbenzyl alcohol and phenyl azide using dioxane as internal standard

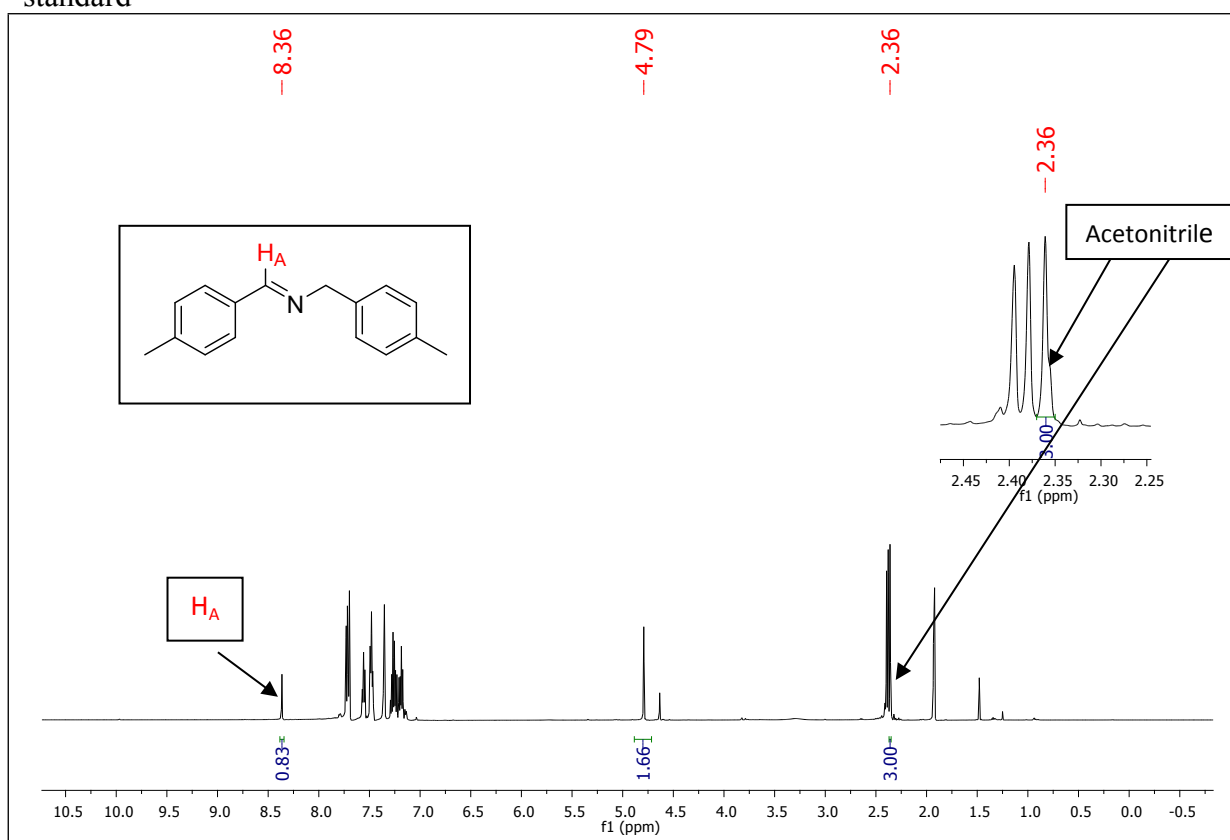

Reaction mixture of 4-methylbenzyl alcohol and 4-methylbenzyl azide using Acetonitrile as internal standard

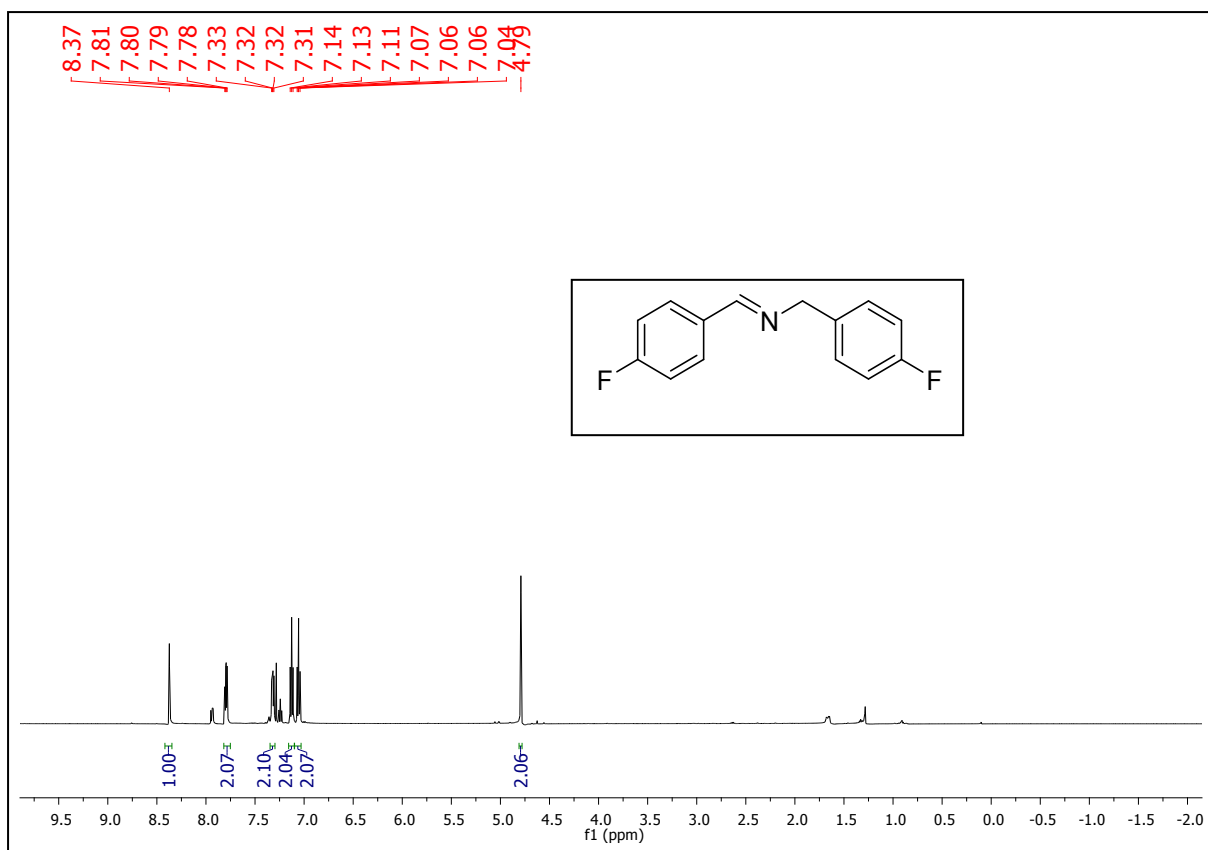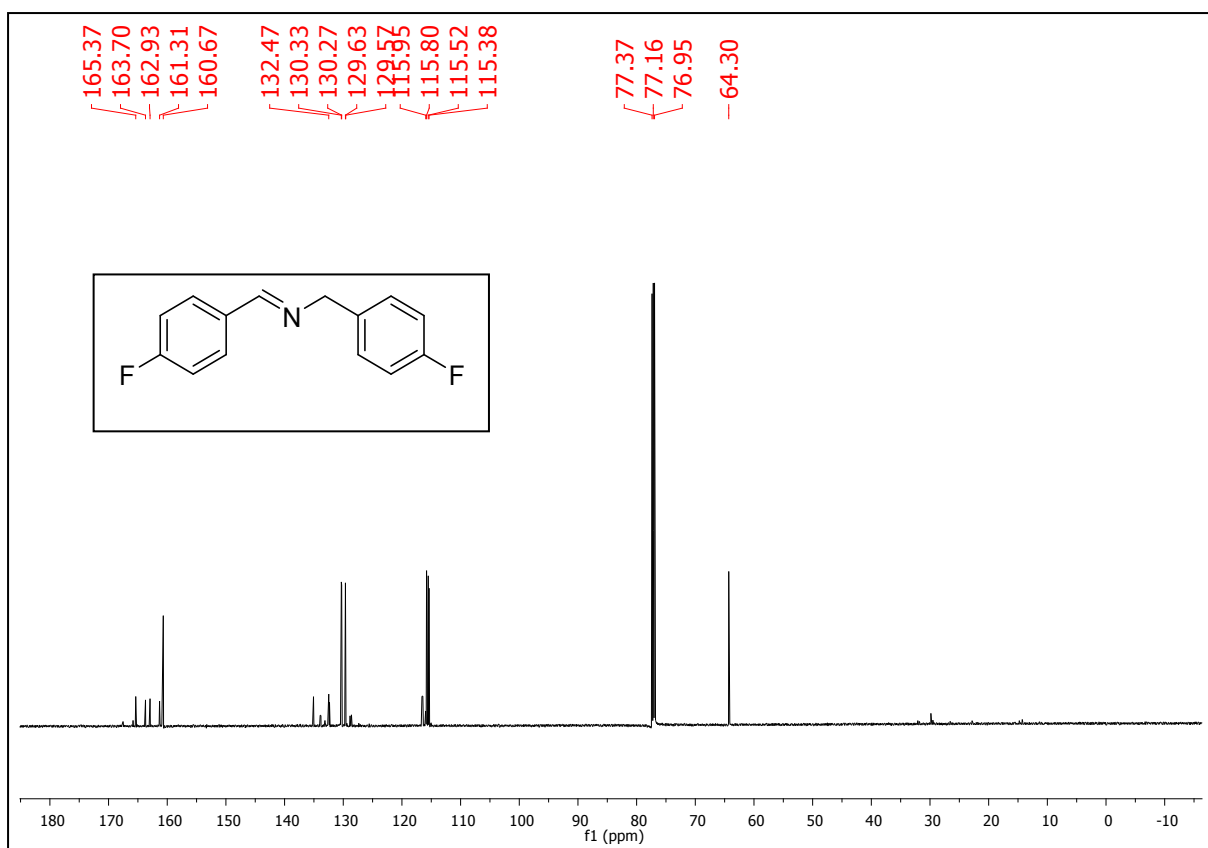

NB-154-P-1H  
NB-154-P-1H

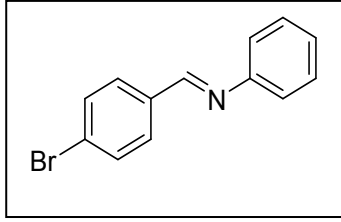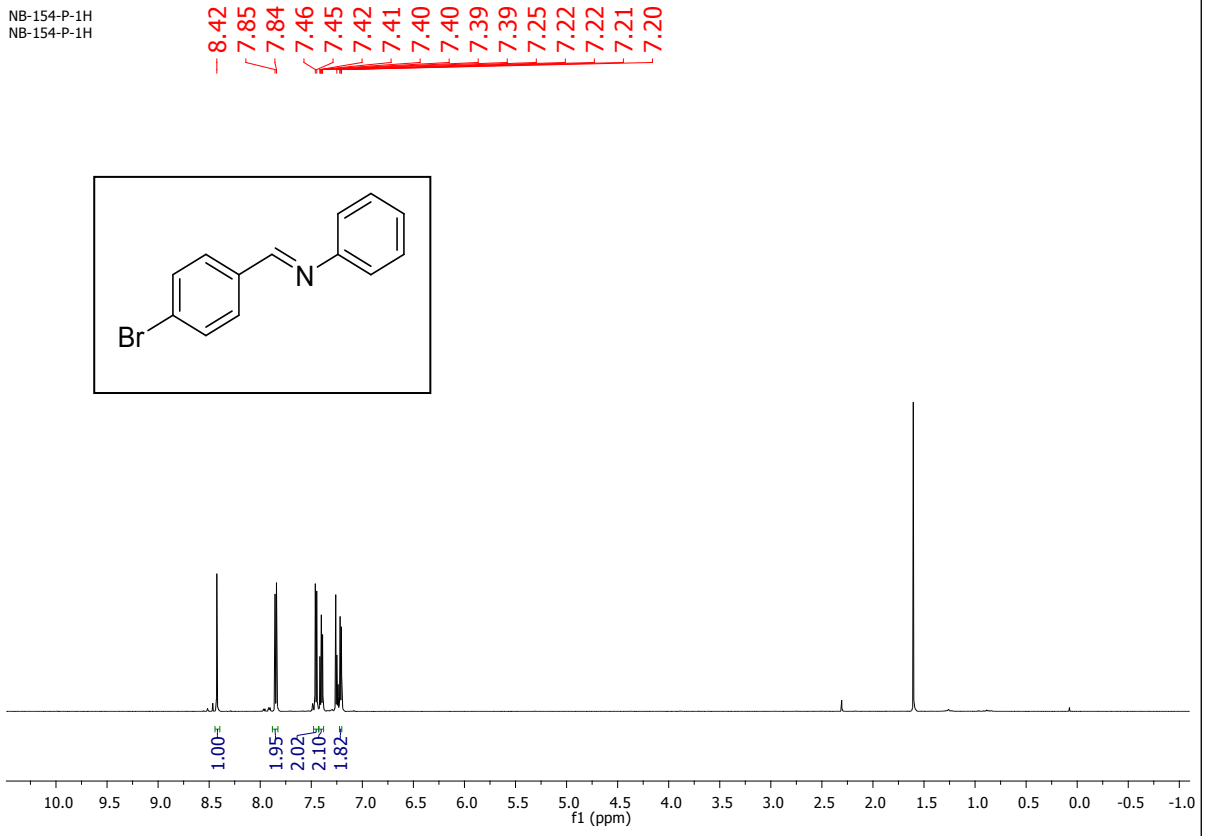

NB-154-P-13C  
NB-154-P-13C

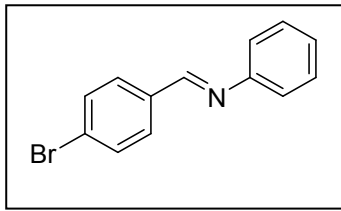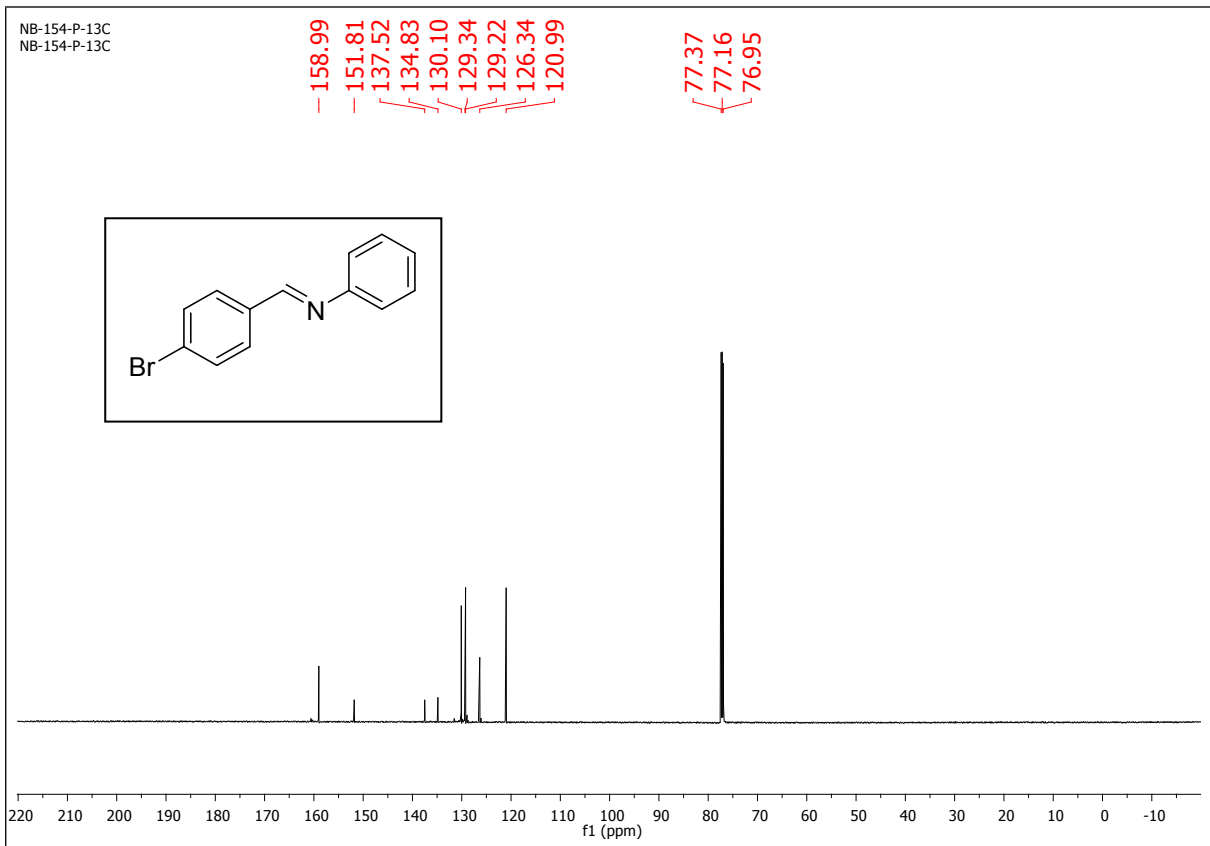

NB-202-1H  
NB-202-1H

8.38  
7.77  
7.75  
7.62  
7.61  
7.51  
7.50  
7.26  
7.09  
7.08

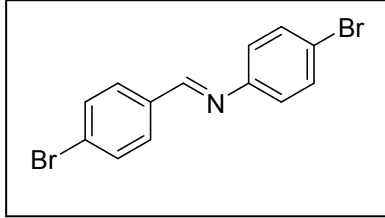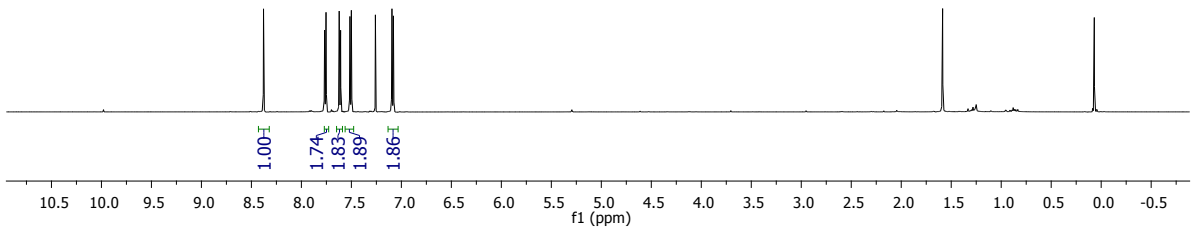

NB-202-13C  
NB-202-13C

159.47  
150.68  
134.93  
132.40  
132.25  
130.34  
126.36  
122.70  
119.78

77.37  
77.16  
76.95

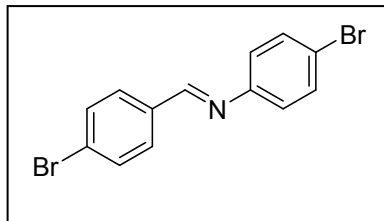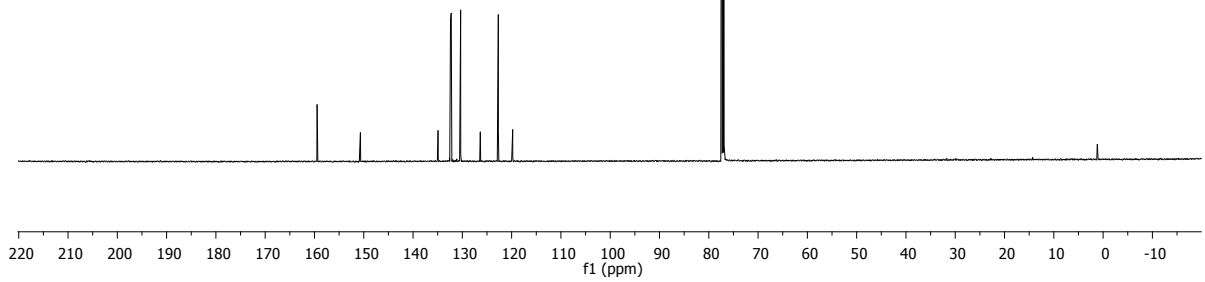

NB-215-P-1H  
NB-215-P-1H

8.43  
7.86  
7.85  
7.24  
7.22  
7.00  
6.99  
6.95  
6.94

3.89  
3.85

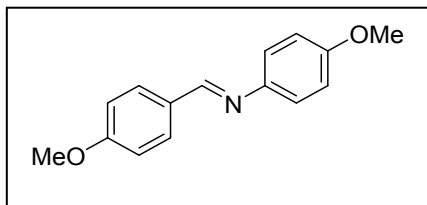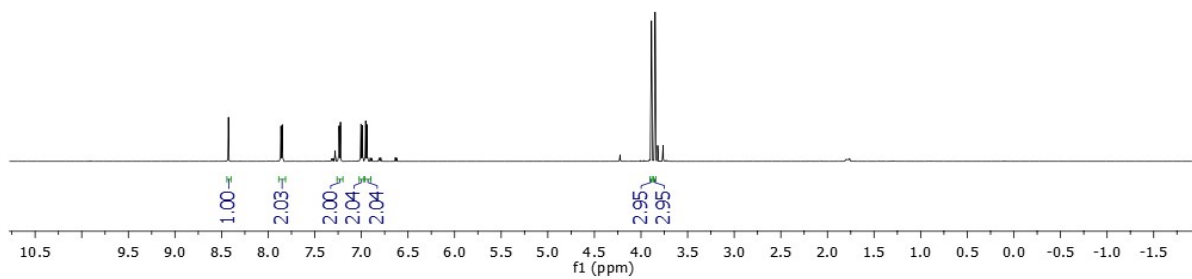

NB-215-P-13C  
NB-215-P-13C

162.08  
158.07  
158.03  
145.34  
130.36  
129.55  
122.19  
114.44  
114.25

77.37  
77.16  
76.95  
55.60  
55.53

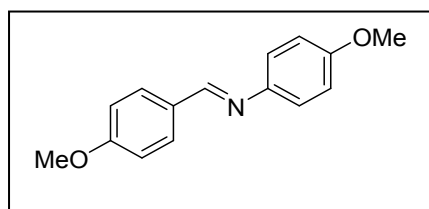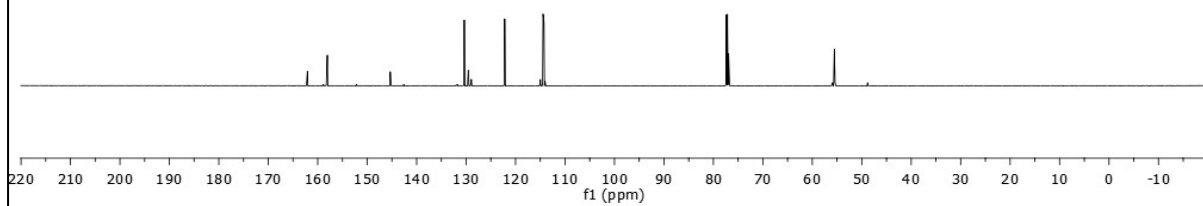

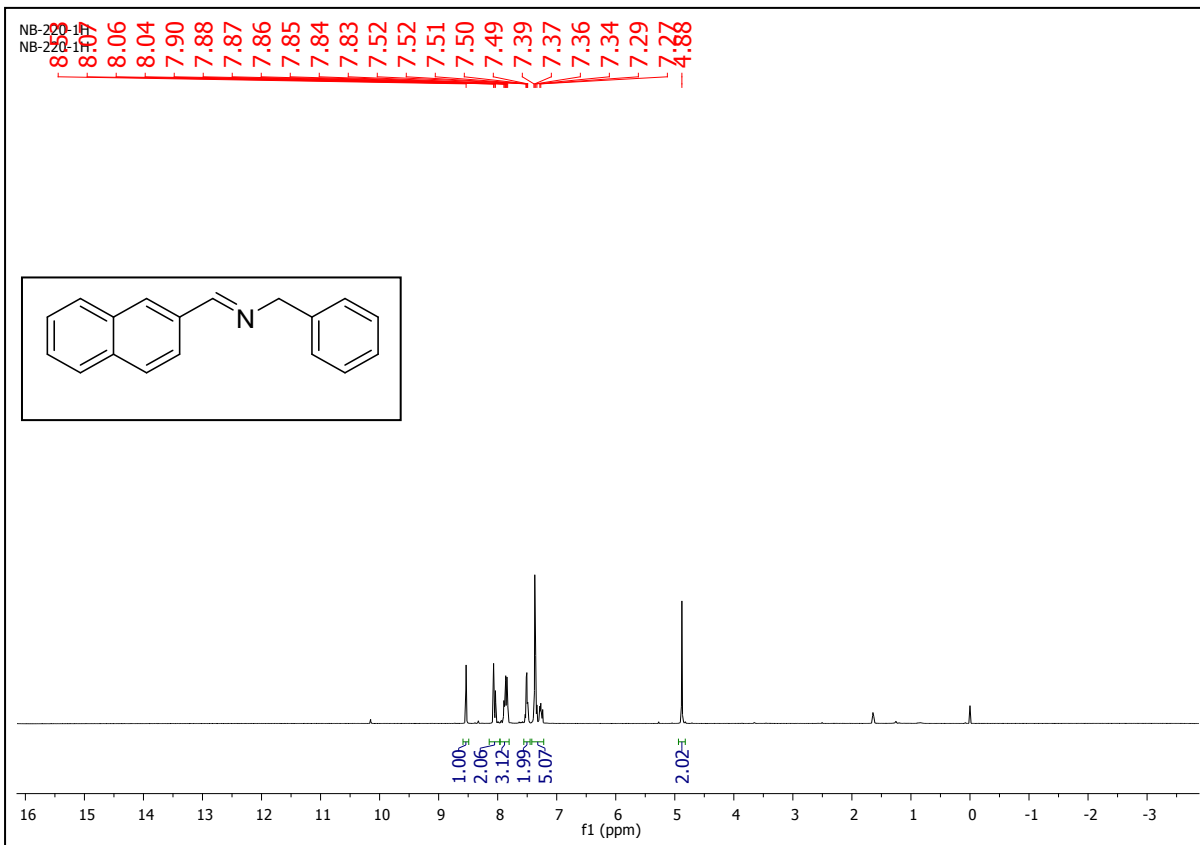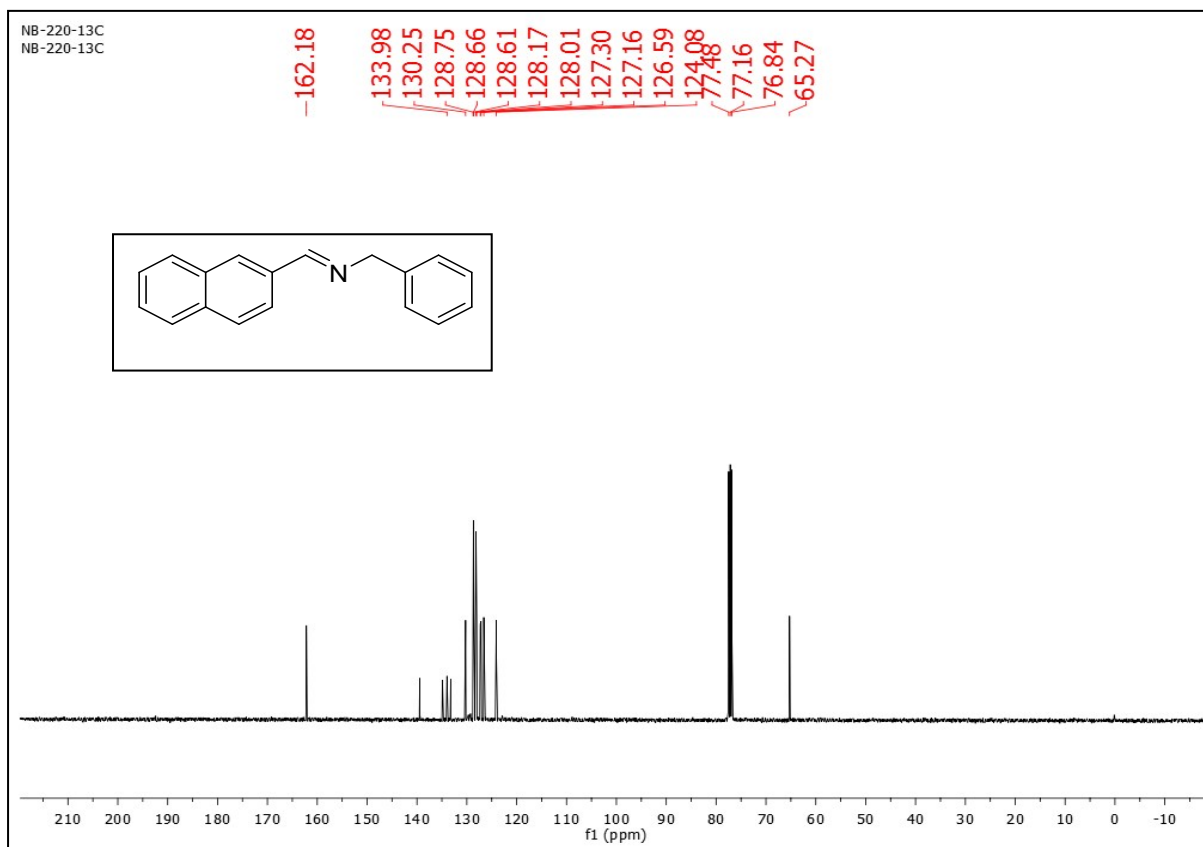



NB-211-P-1H  
NB-211-P-1H

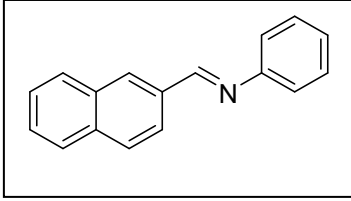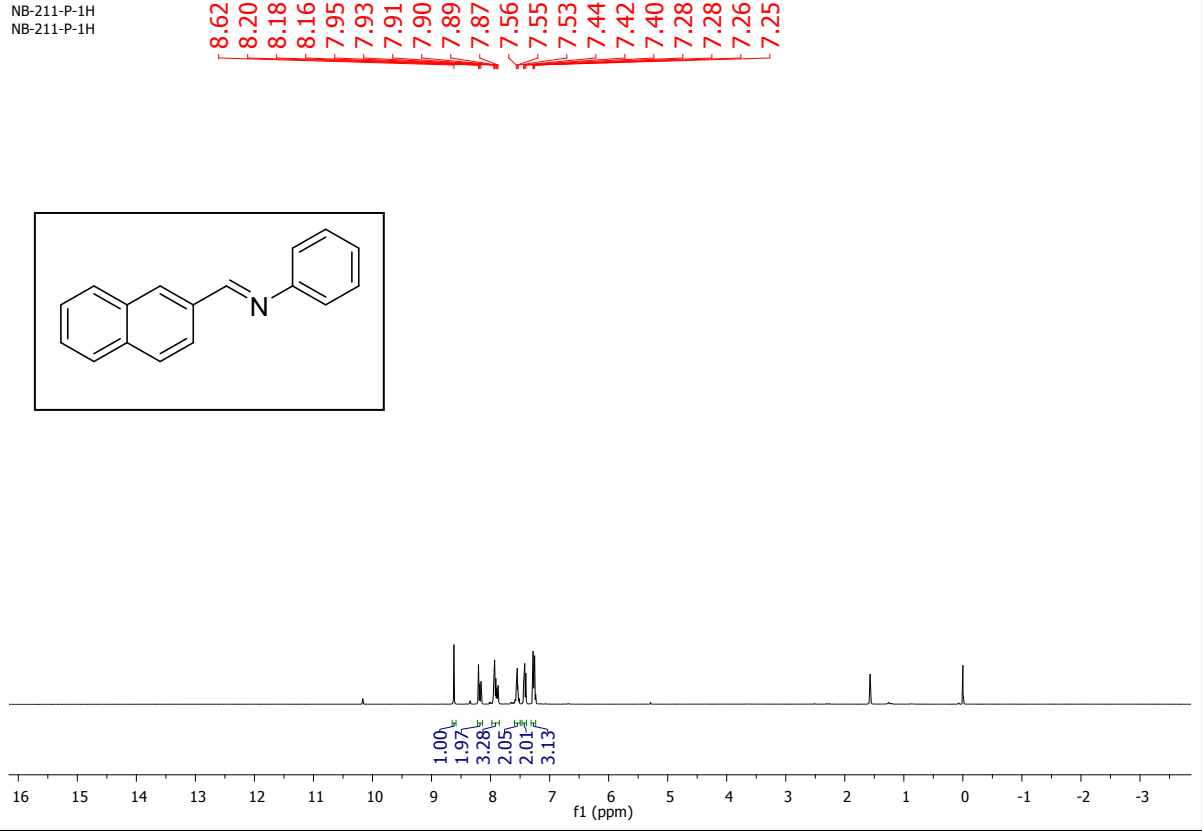

NB-211-P-1H  
NB-211-P-13C

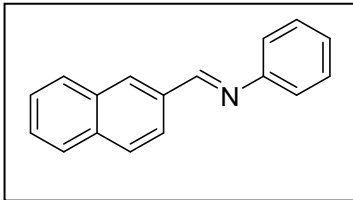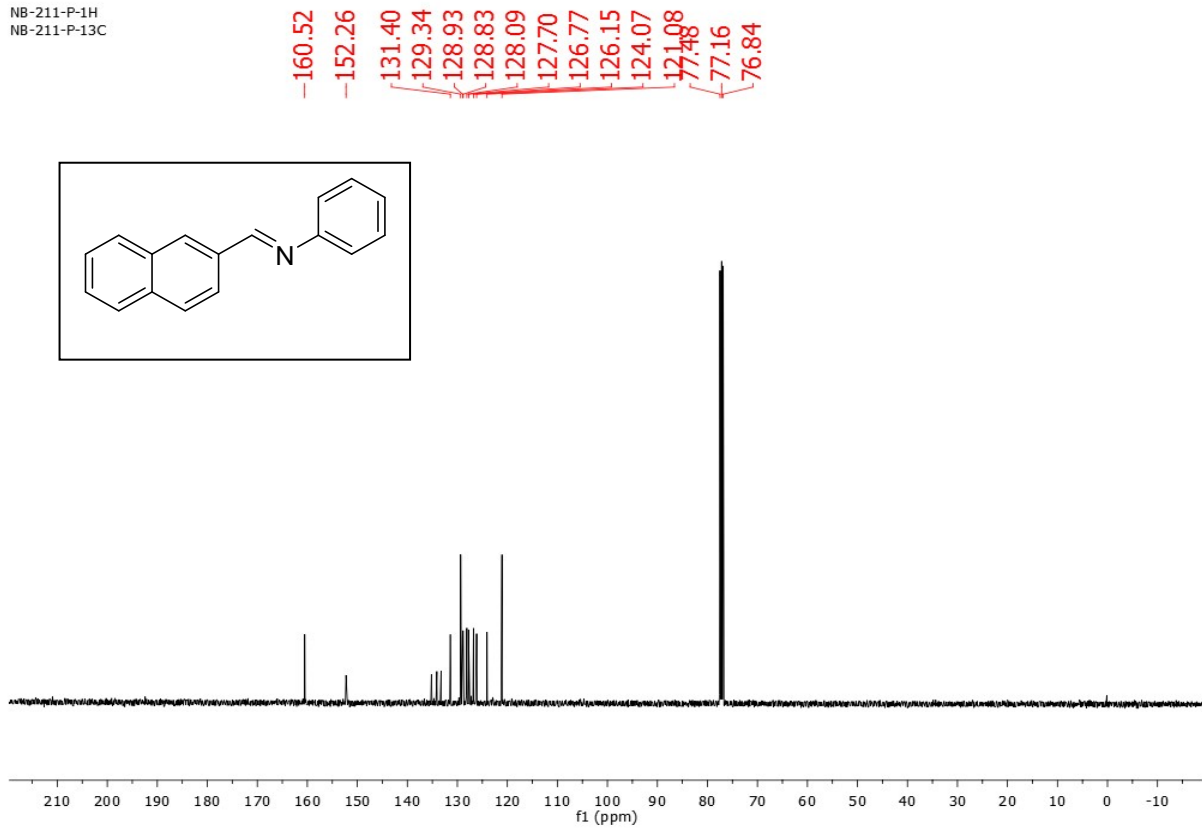

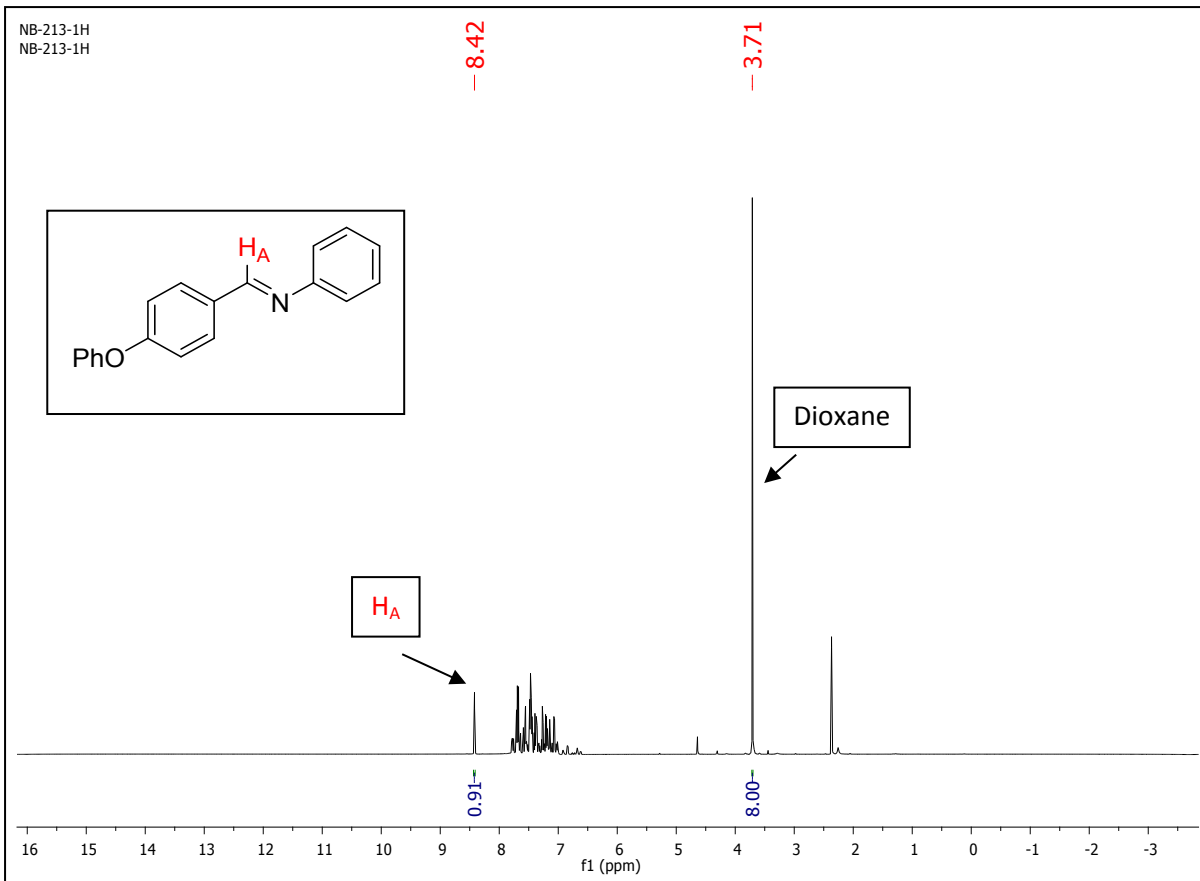

Reaction mixture of 4-phenoxybenzyl alcohol and phenyl azide using dioxane as internal standard

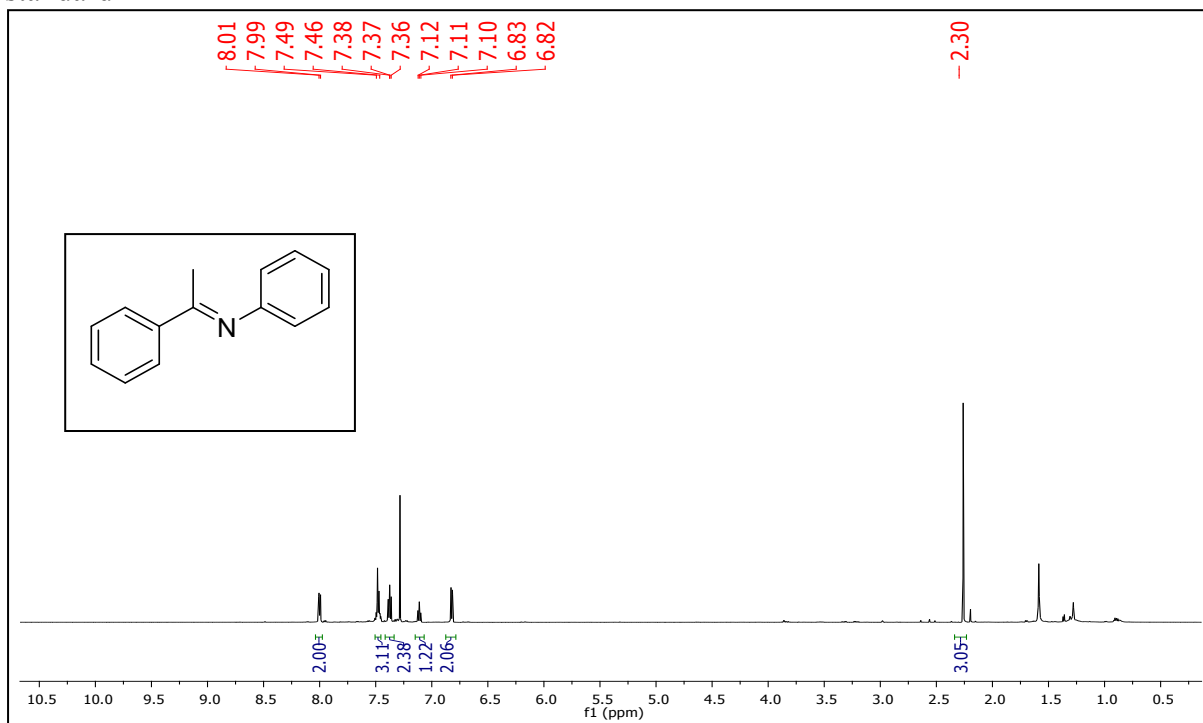

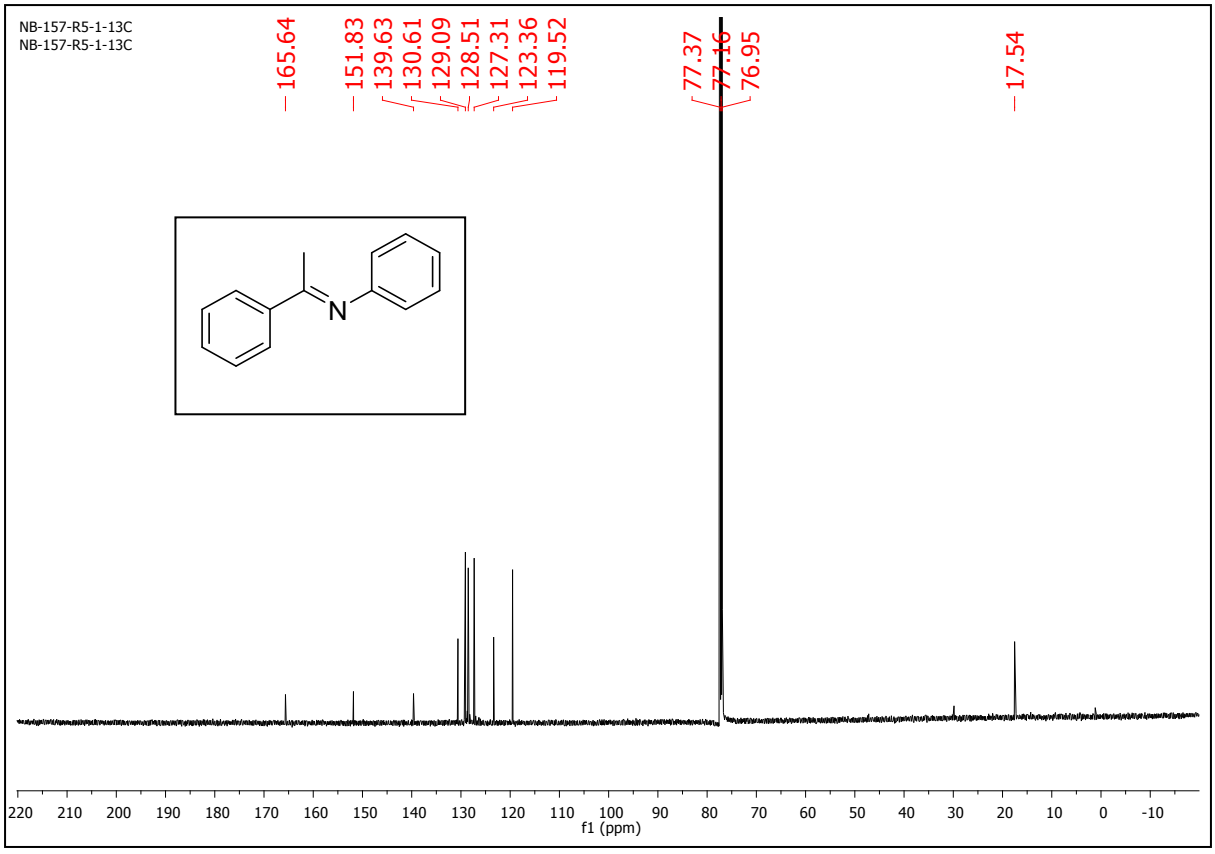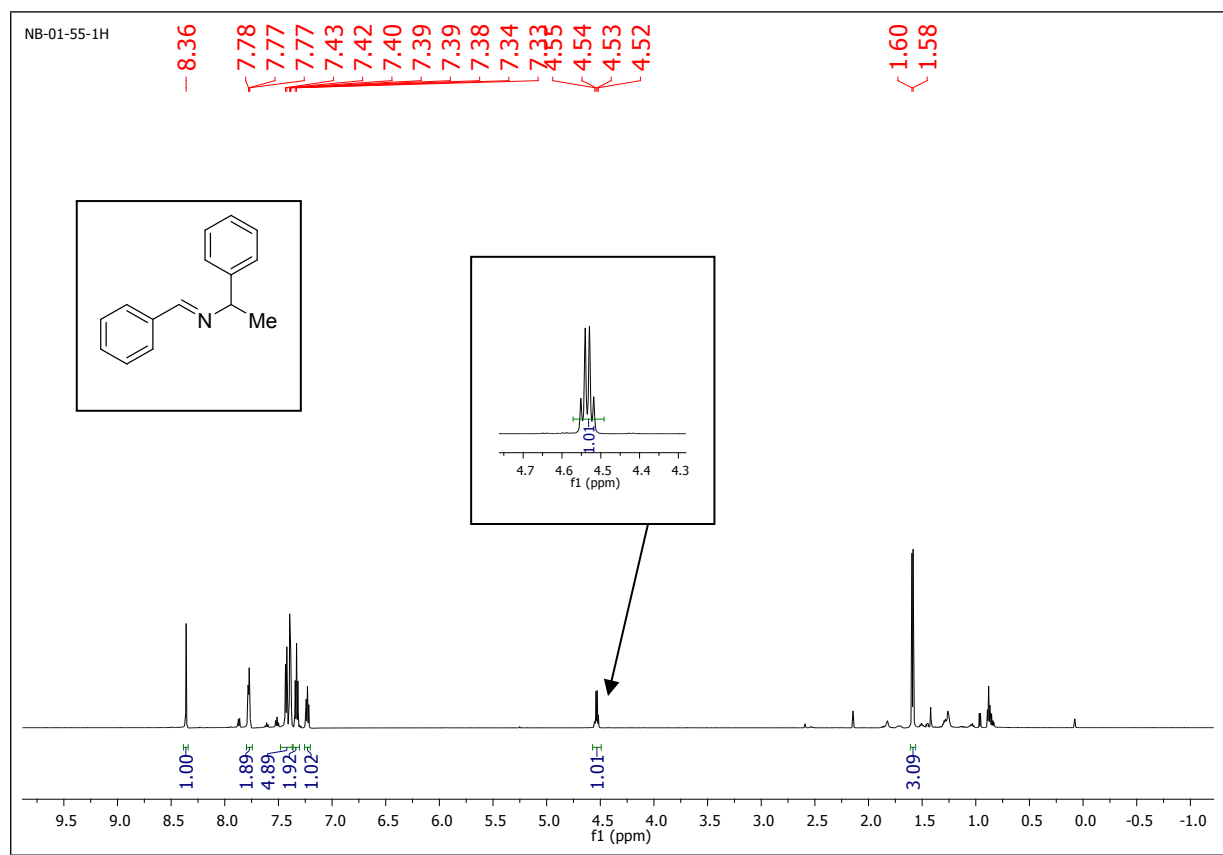

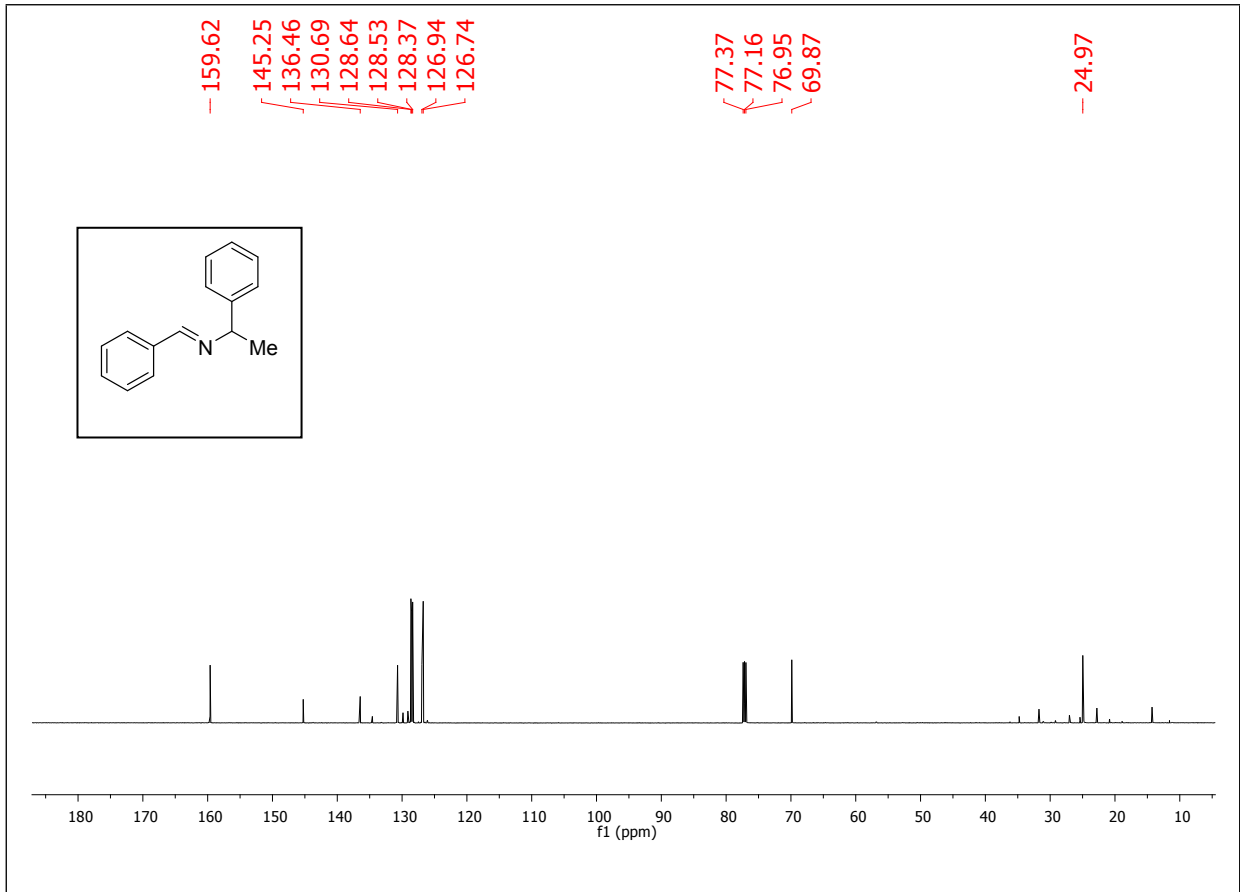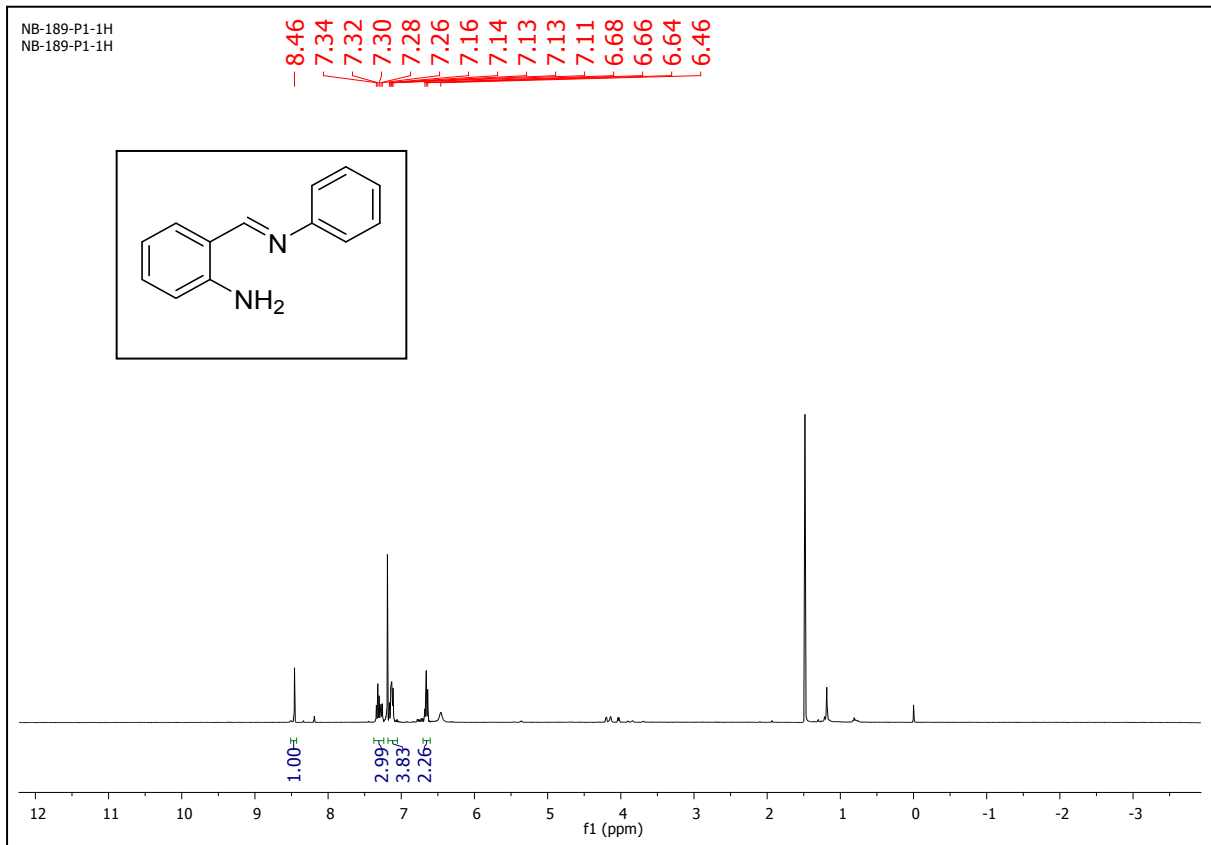

NB-189-F1\_13C  
NB-189-F1\_13C

163.29  
152.07  
148.95  
134.53  
131.96  
129.30  
125.67  
121.10  
117.81  
116.40  
115.94  
77.37  
77.16  
76.95

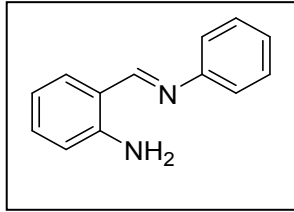

220 210 200 190 180 170 160 150 140 130 120 110 100 90 80 70 60 50 40 30 20 10 0 -10  
f1 (ppm)

NB-224-2ND-1H  
NB-224-2ND-1H

8.95  
8.33  
8.32  
8.31  
8.30  
8.09  
8.09  
8.07  
8.07  
7.77  
7.75  
7.73  
7.65  
7.64  
7.63  
7.61  
7.61  
7.45  
7.43  
7.41  
7.30  
7.30  
7.29  
7.28  
7.26

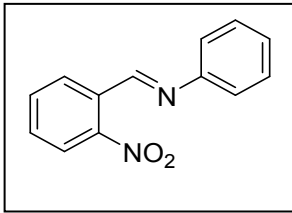

1.00  
1.06  
1.02  
1.17  
1.13  
2.22  
2.94

16 15 14 13 12 11 10 9 8 7 6 5 4 3 2 1 0 -1 -2 -3  
f1 (ppm)

NB-224-2ND-13C  
NB-224-2ND-13C

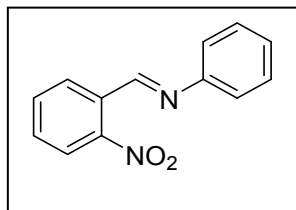

156.02  
151.22  
133.75  
131.34  
129.91  
129.44  
127.08  
124.70  
121.34  
77.48  
77.16  
76.84

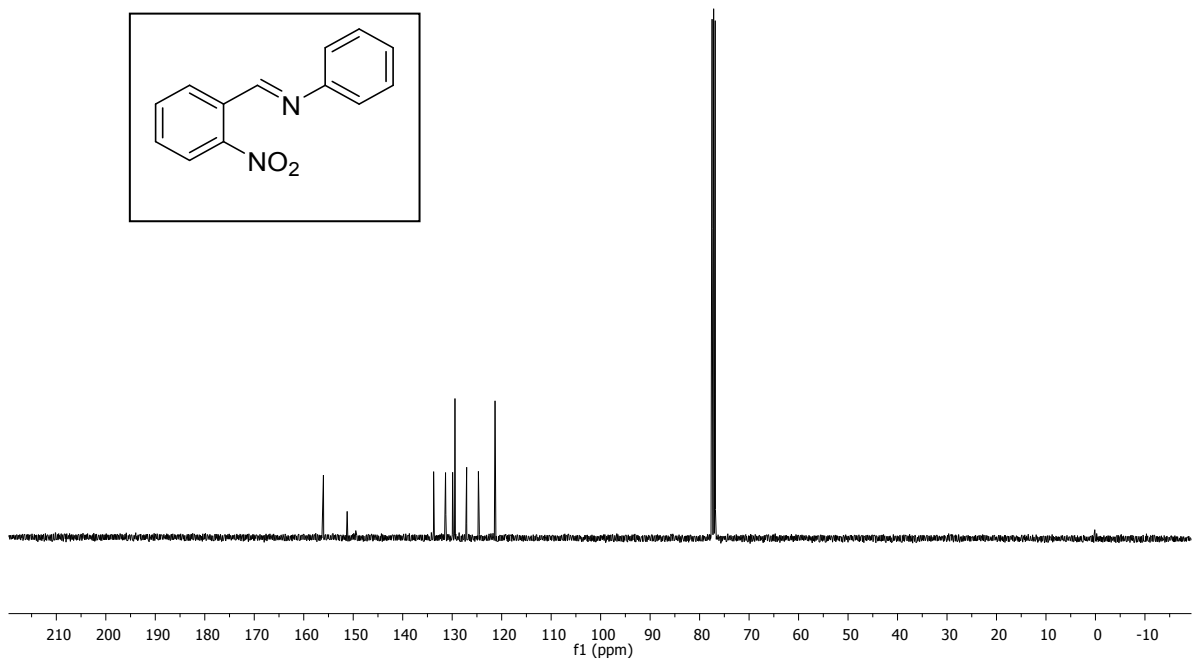

NB-198-1H  
NB-198-1H

NB-198-1H  
NB-198-1H

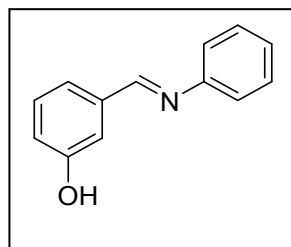

8.37  
7.46  
7.42  
7.41  
7.40  
7.37  
7.36  
7.32  
7.31  
7.30  
7.28  
7.27  
7.24  
7.23  
6.99  
6.98

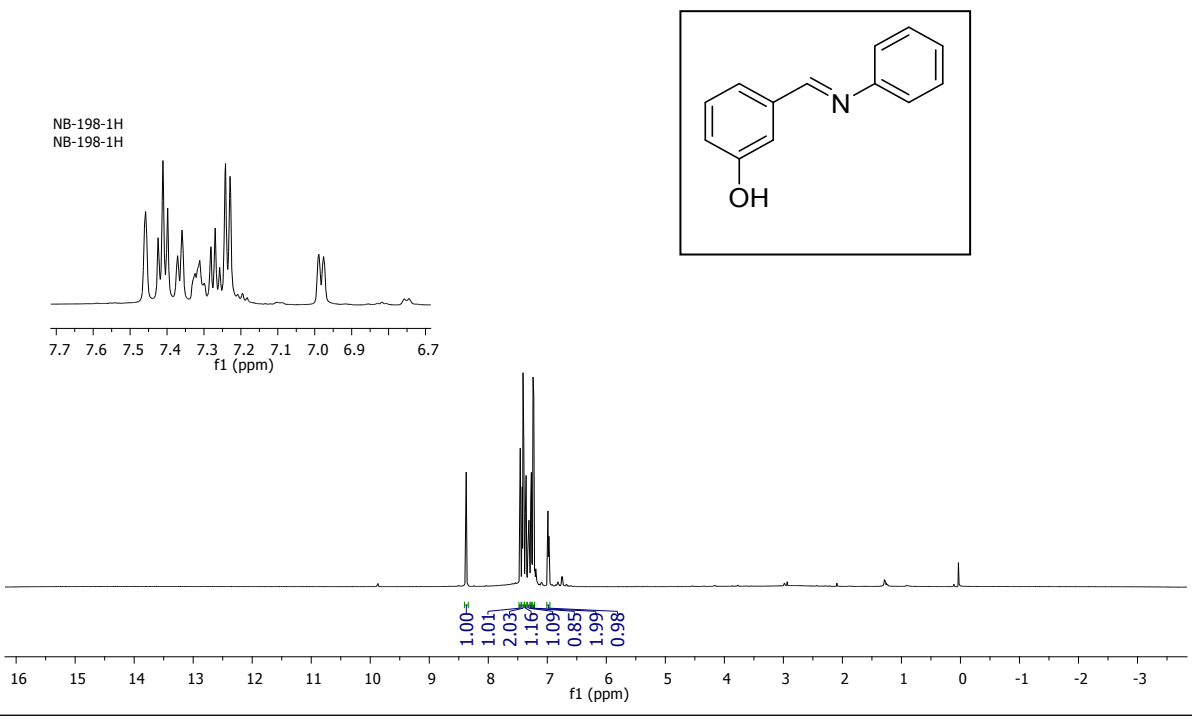

NB-198-13C  
NB-198-13C

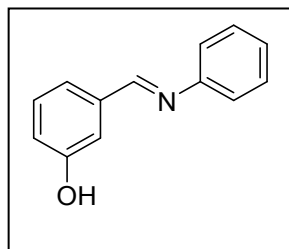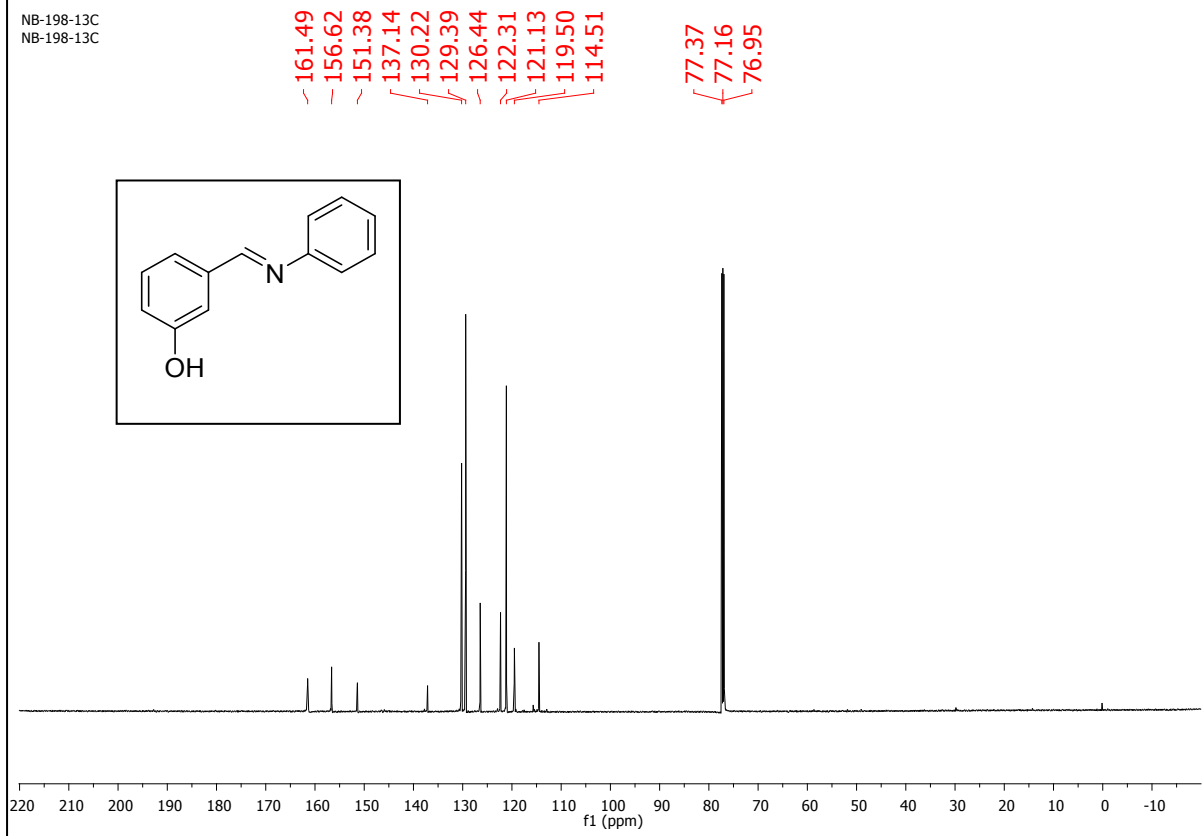

NB-187-P-1H  
NB-187-P-1H

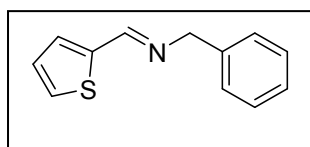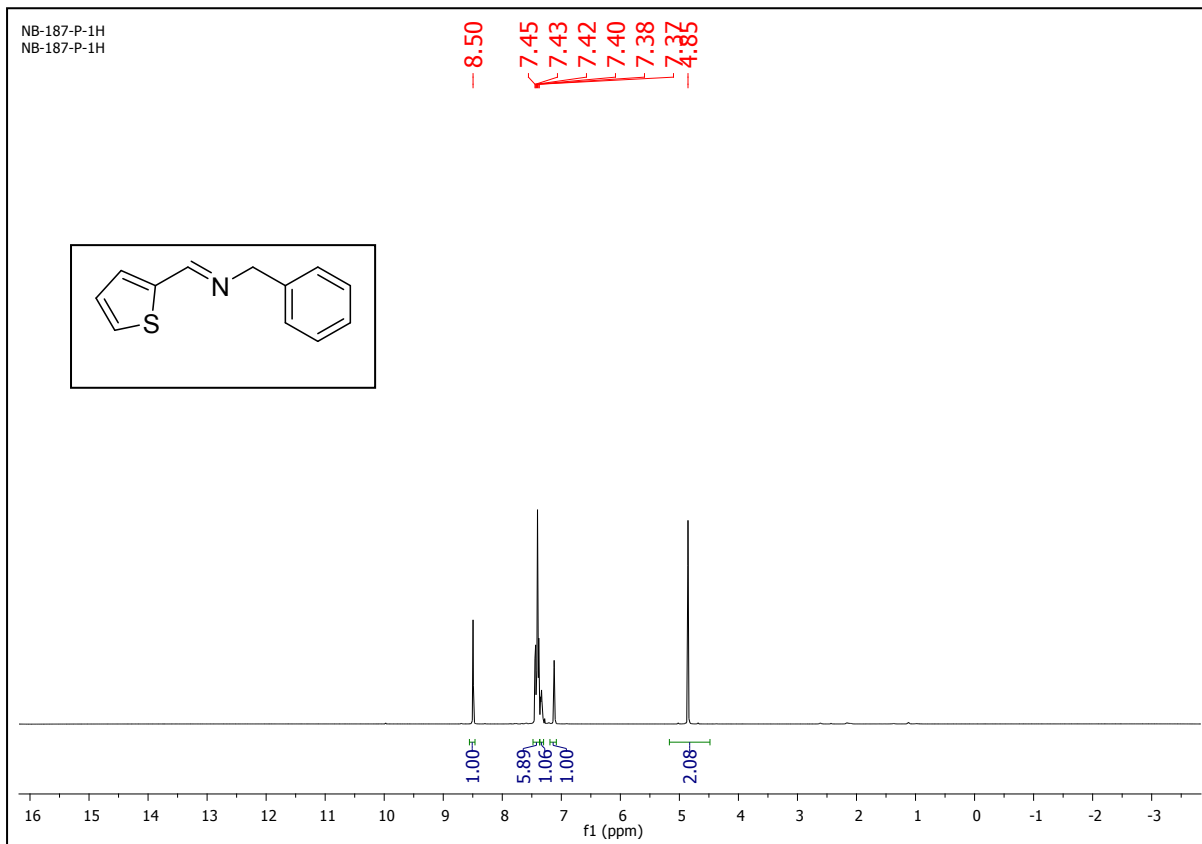

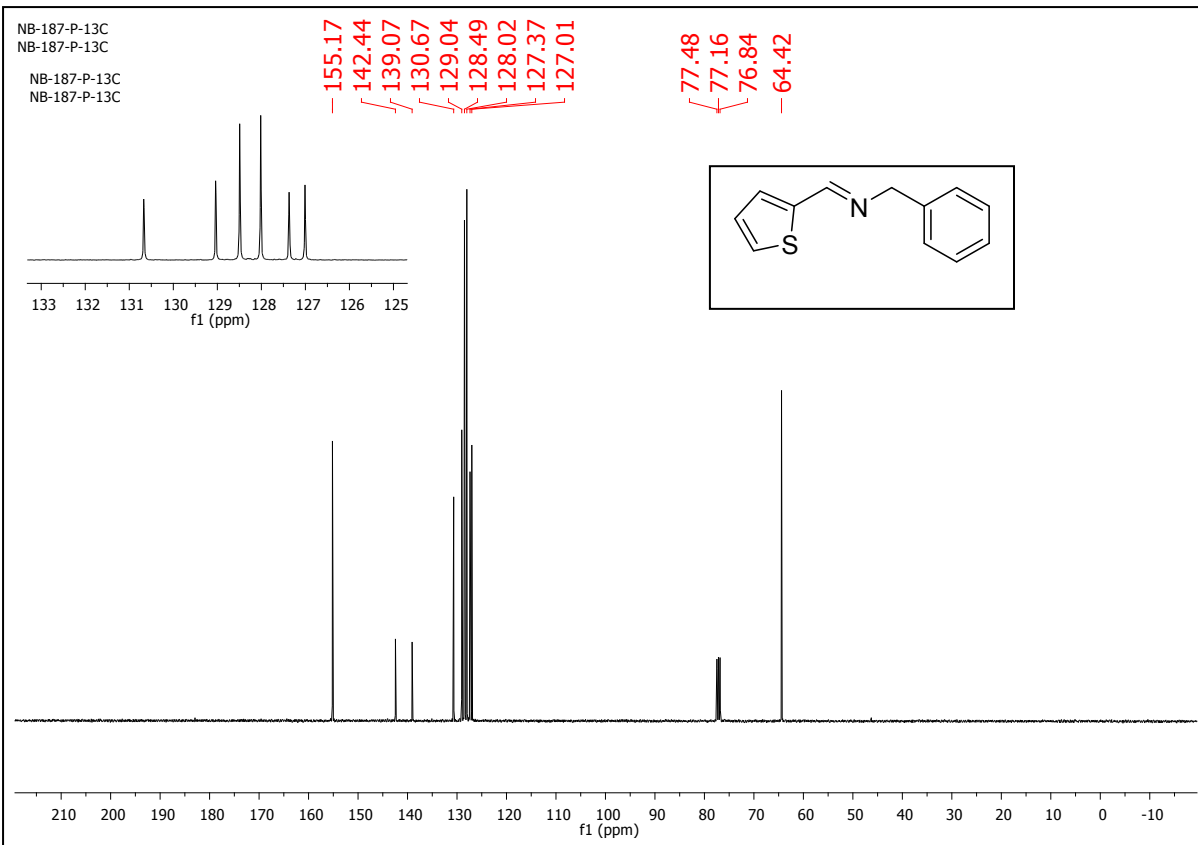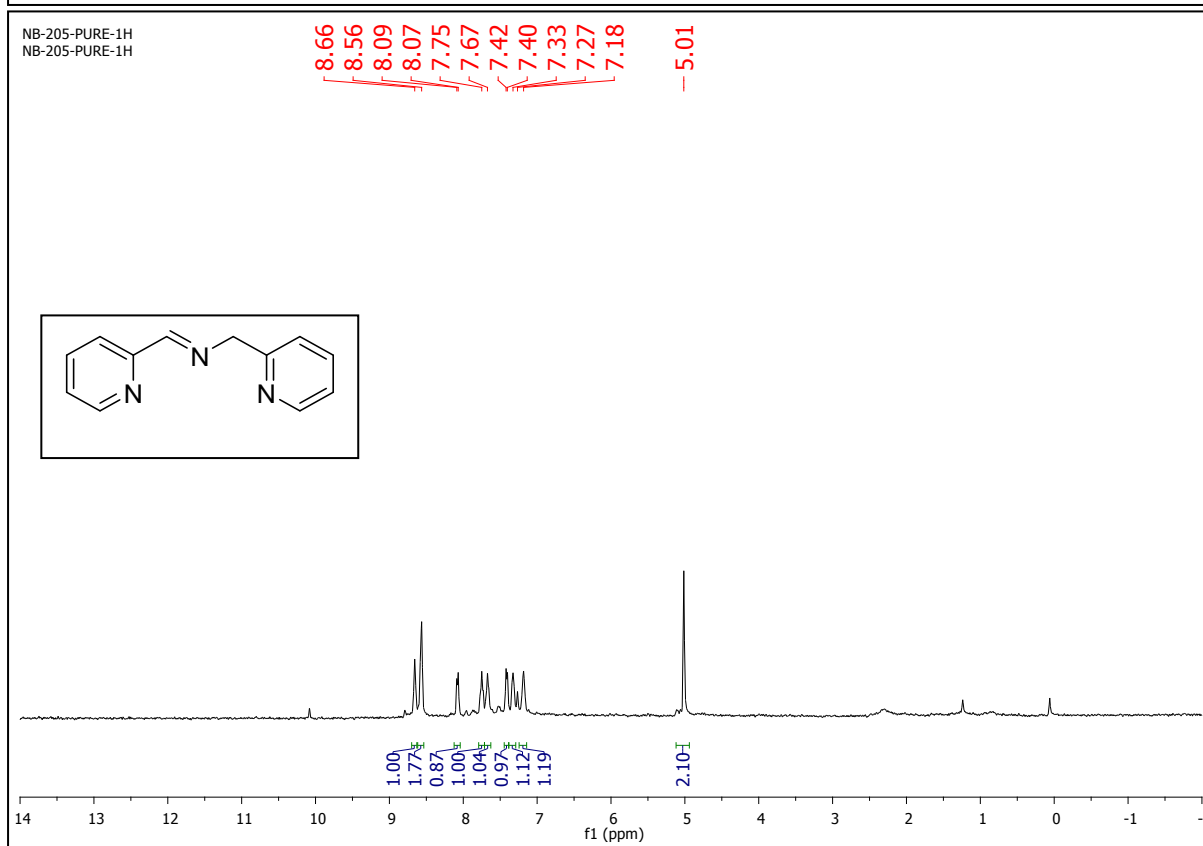



NB-205-PURE-13C  
NB-205-PURE-13C

164.08  
158.85  
154.51  
149.63  
149.50  
136.83  
136.70  
125.07  
122.51  
122.28  
121.64

77.48  
77.16  
76.84  
66.70

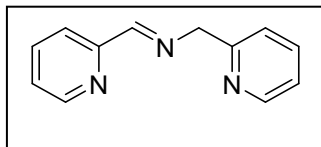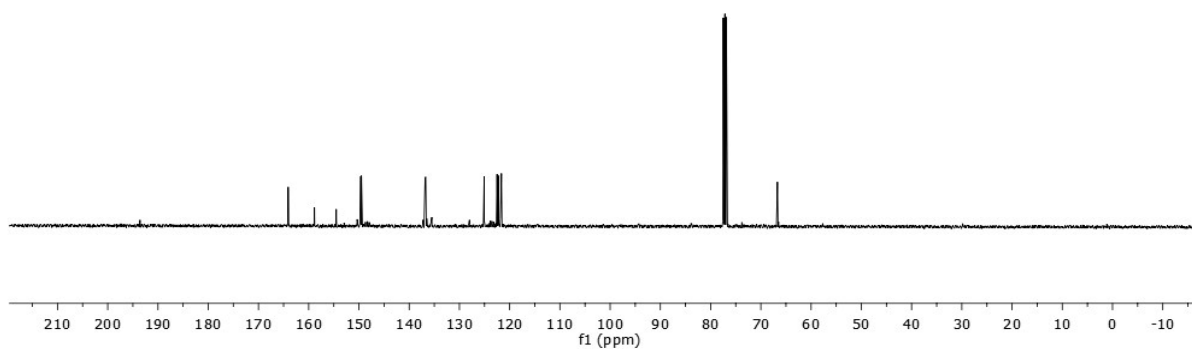

NB-168-P-1H  
NB-168-P-1H

8.64  
8.63  
8.53  
8.14  
8.12  
7.76  
7.74  
7.72  
7.36  
7.34  
7.32  
7.31  
7.30  
7.29  
7.29  
7.28  
7.23  
7.21  
7.20  
7.19

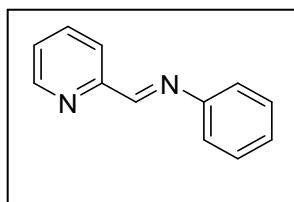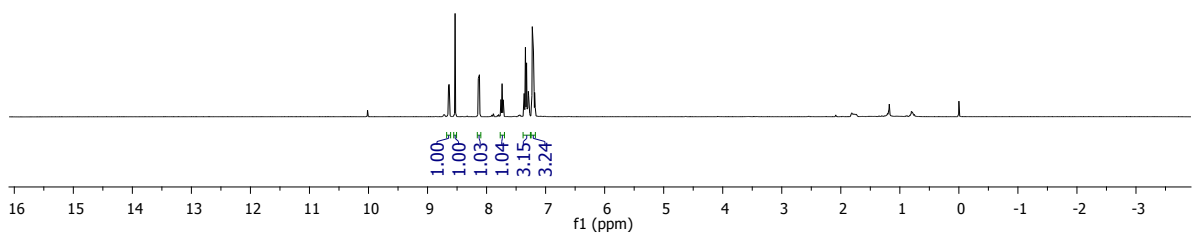

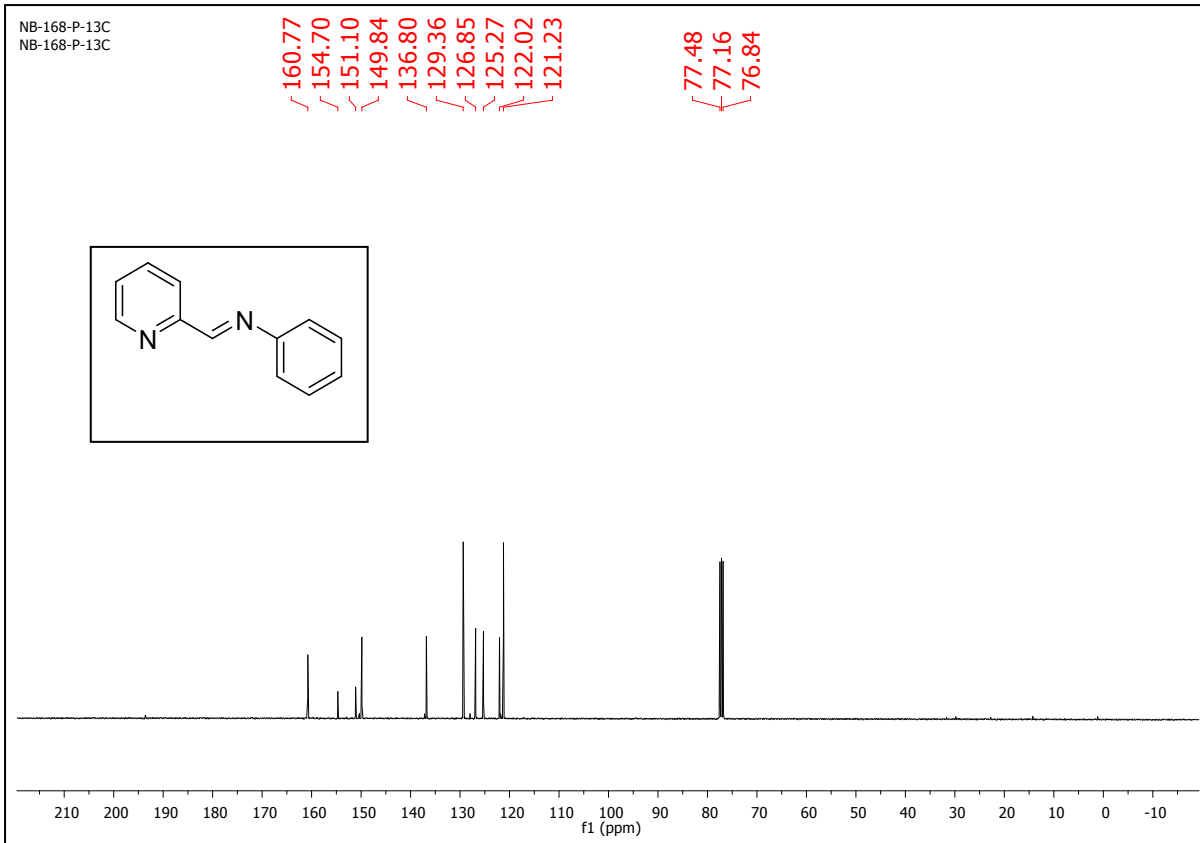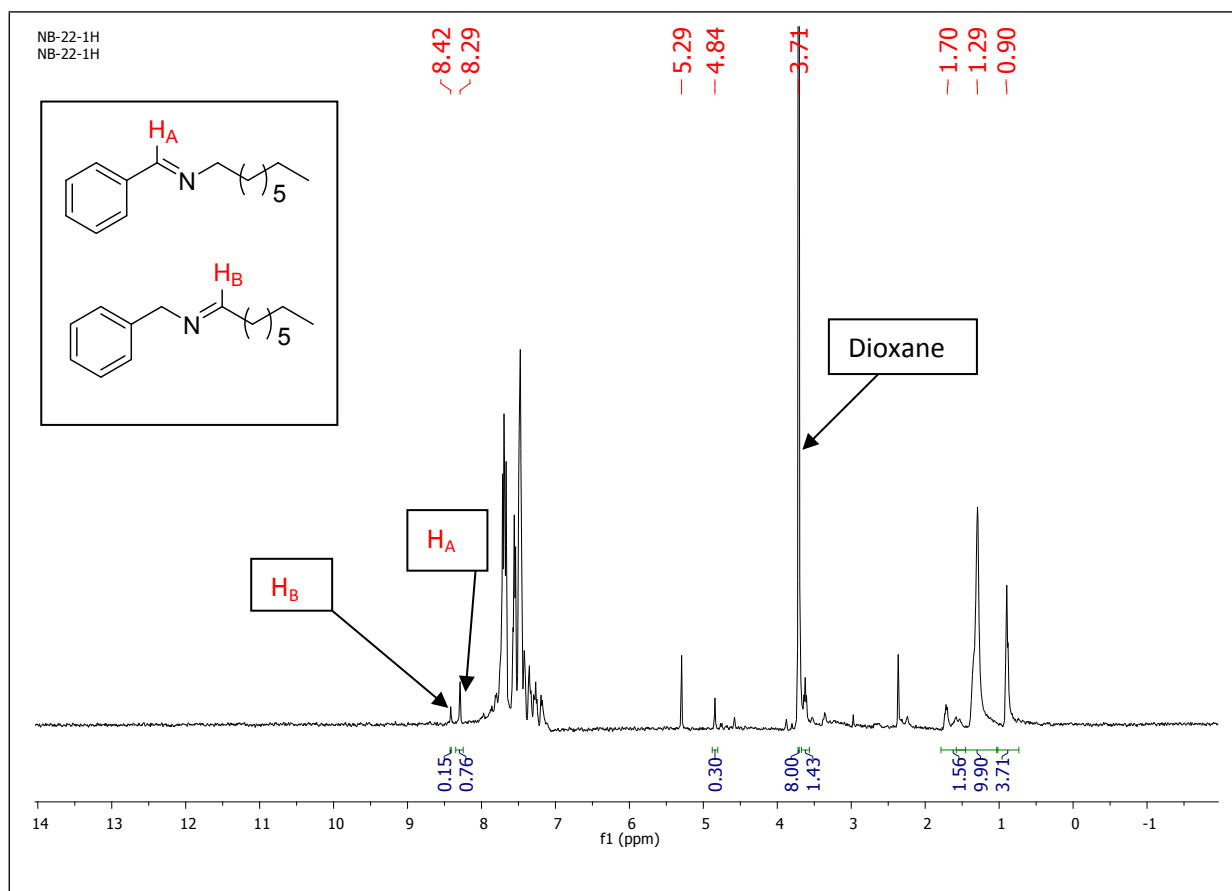

Reaction mixture of 1-Octanol and benzyl azide using dioxane as internal standard

NB-219-B-P-1H  
NB-219-B-P-1H

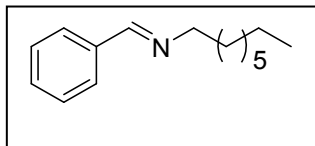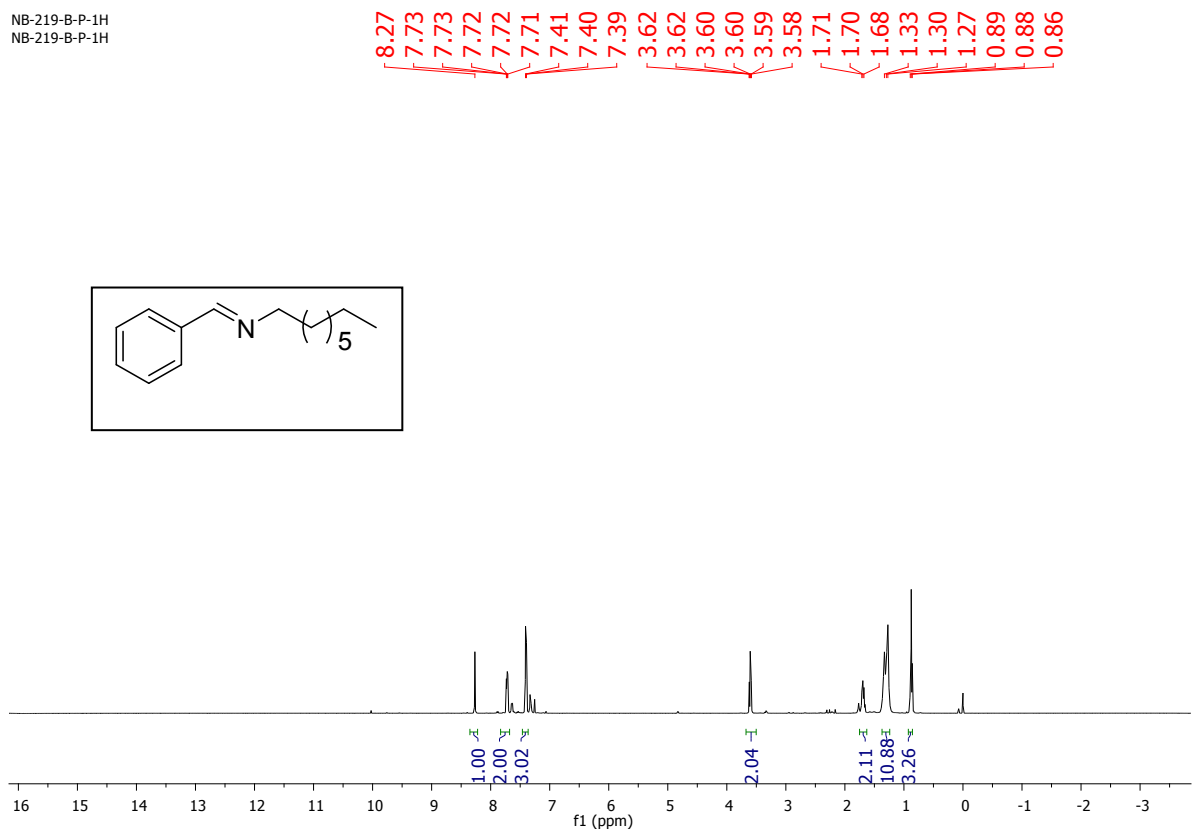

NB-219-B-P-13C  
NB-219-B-P-13C

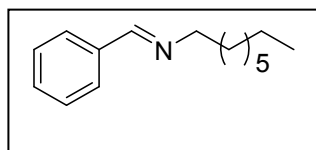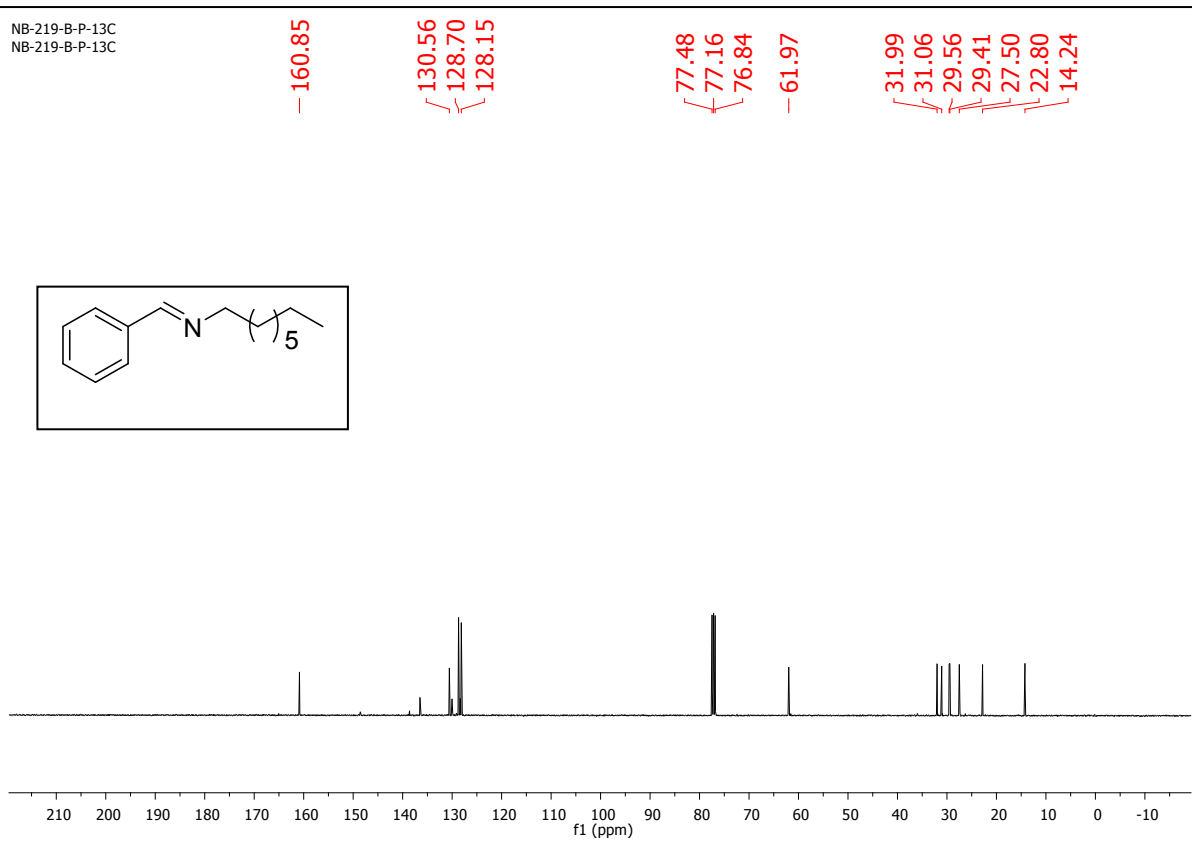

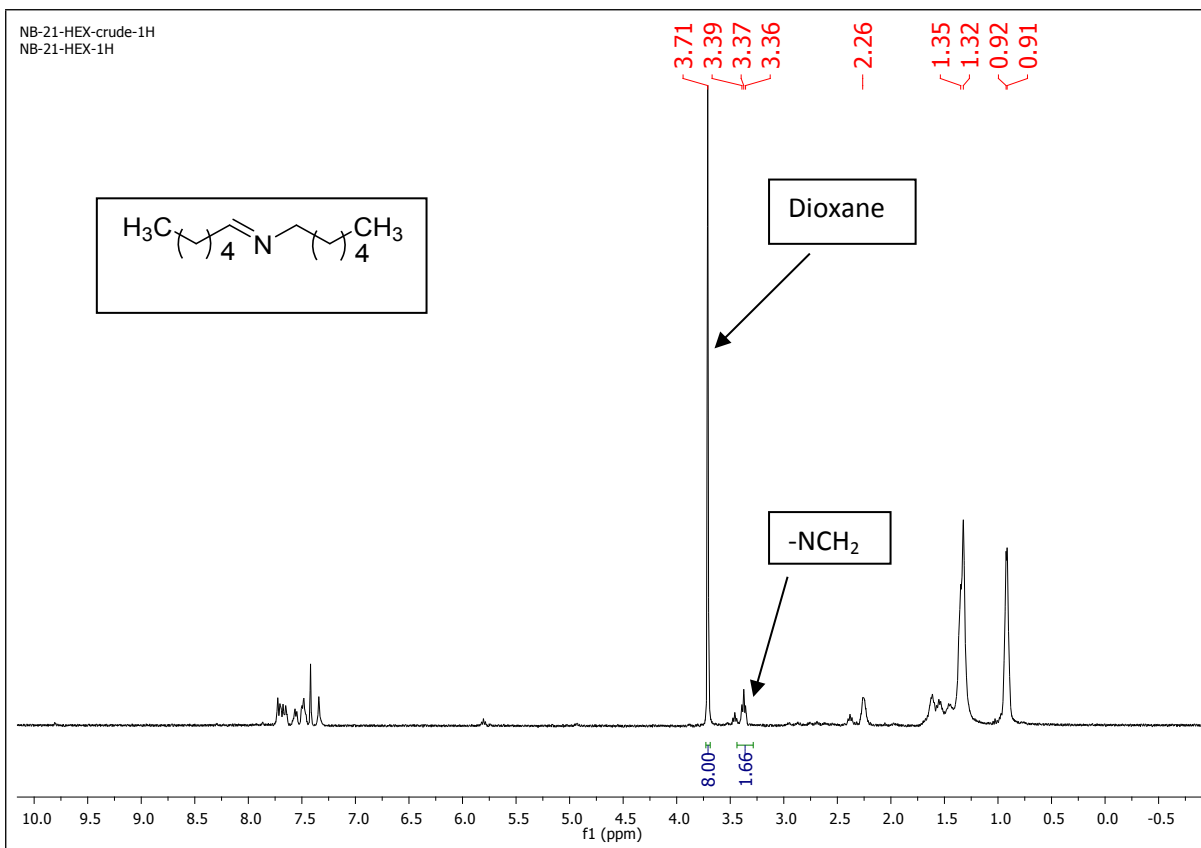

Reaction mixture of 1-hexanol and hexyl azide using dioxane as internal standard

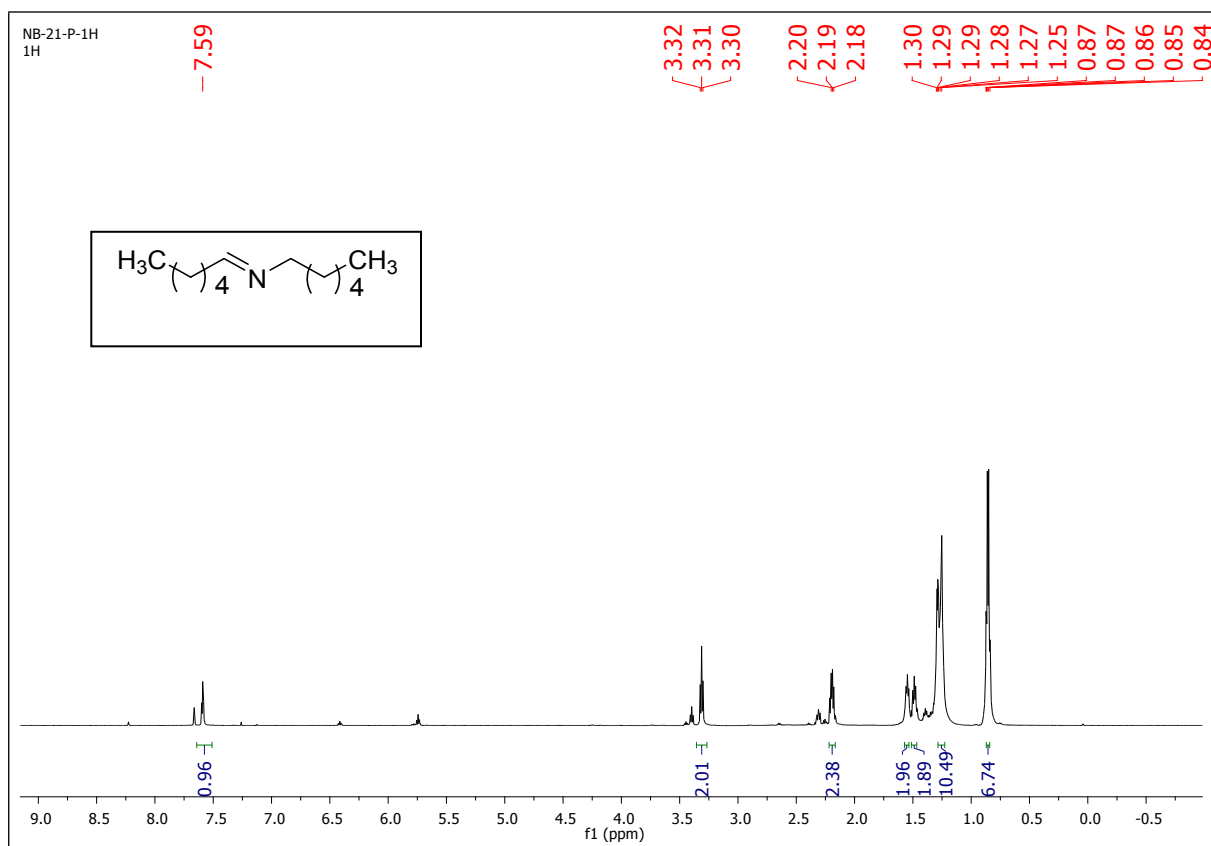

NB-21-P-13C  
13C

-165.02

77.37  
77.16  
76.95  
-61.53  
35.90  
31.72  
31.58  
30.82  
27.00  
25.93  
22.73  
22.57  
14.16  
14.08

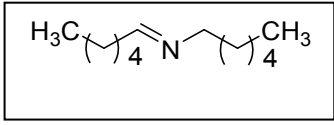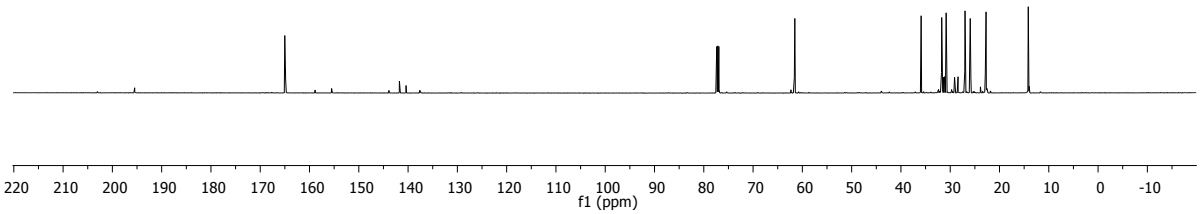

NB-21-P-13H  
NB-201-P-13H

7.42  
7.42  
7.41  
7.40  
7.31  
7.30  
7.29  
7.28  
7.26  
7.20  
7.18  
7.16  
4.35  
4.34  
4.33  
4.32  
3.83  
3.82  
3.74  
3.73  
3.29  
3.27  
3.25  
3.24  
2.17  
2.16  
2.15  
2.14  
1.88  
1.86  
1.85  
1.83  
1.80  
1.78  
1.77  
1.71  
1.69  
1.68

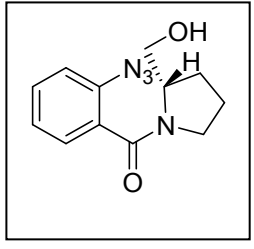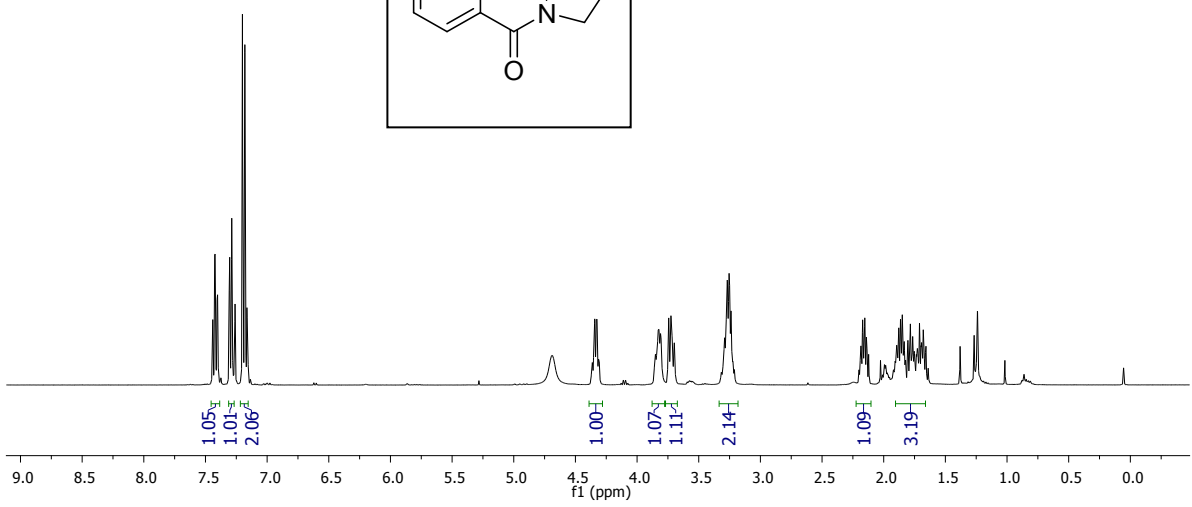

NB-201-P-13C  
NB-201-P-13C

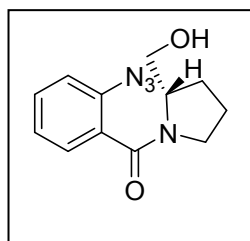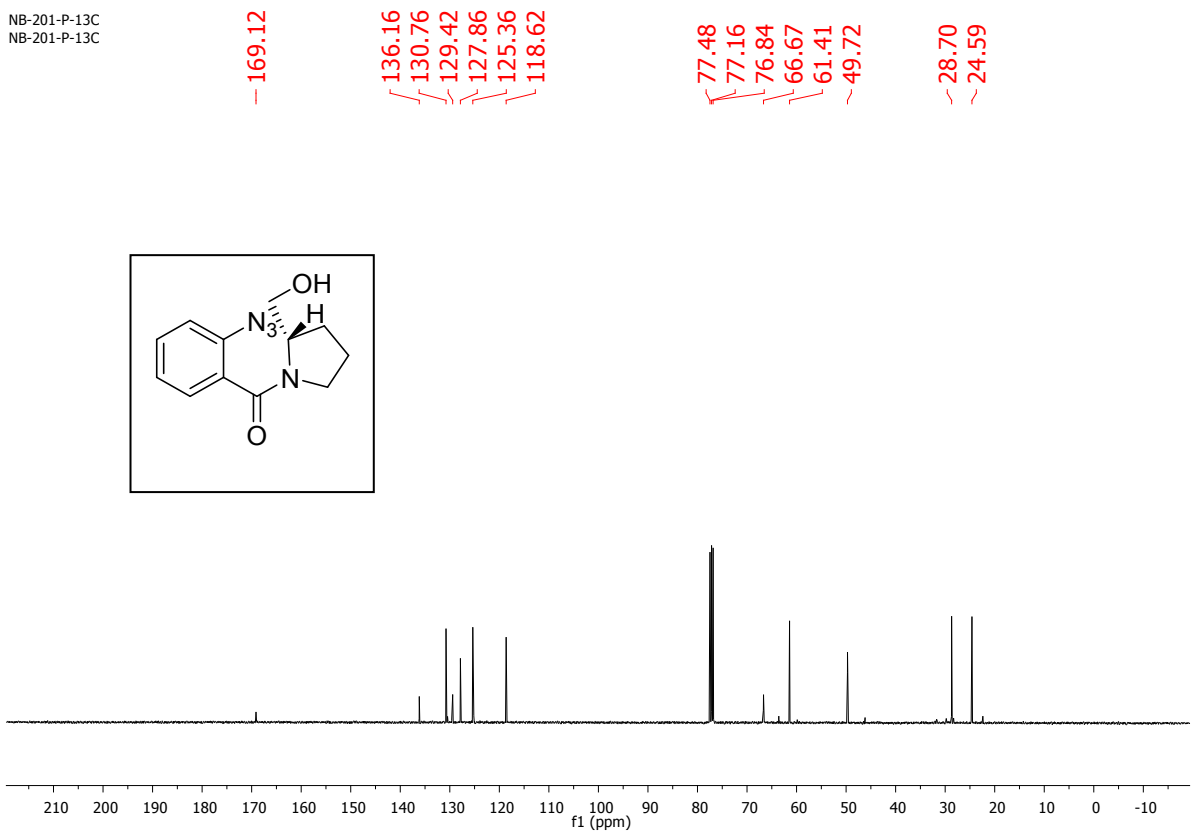

8.05  
8.03  
7.54  
7.54  
7.52  
7.50  
7.50  
7.33  
7.31  
7.26  
3.86  
3.85  
3.84  
3.83  
3.76  
3.75  
3.74  
3.73  
3.72  
3.60  
3.58  
3.56  
2.55  
2.34  
2.33  
2.31  
2.30  
2.10  
2.09  
2.08  
2.08  
2.07  
2.06  
2.04

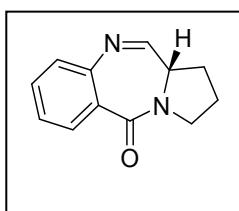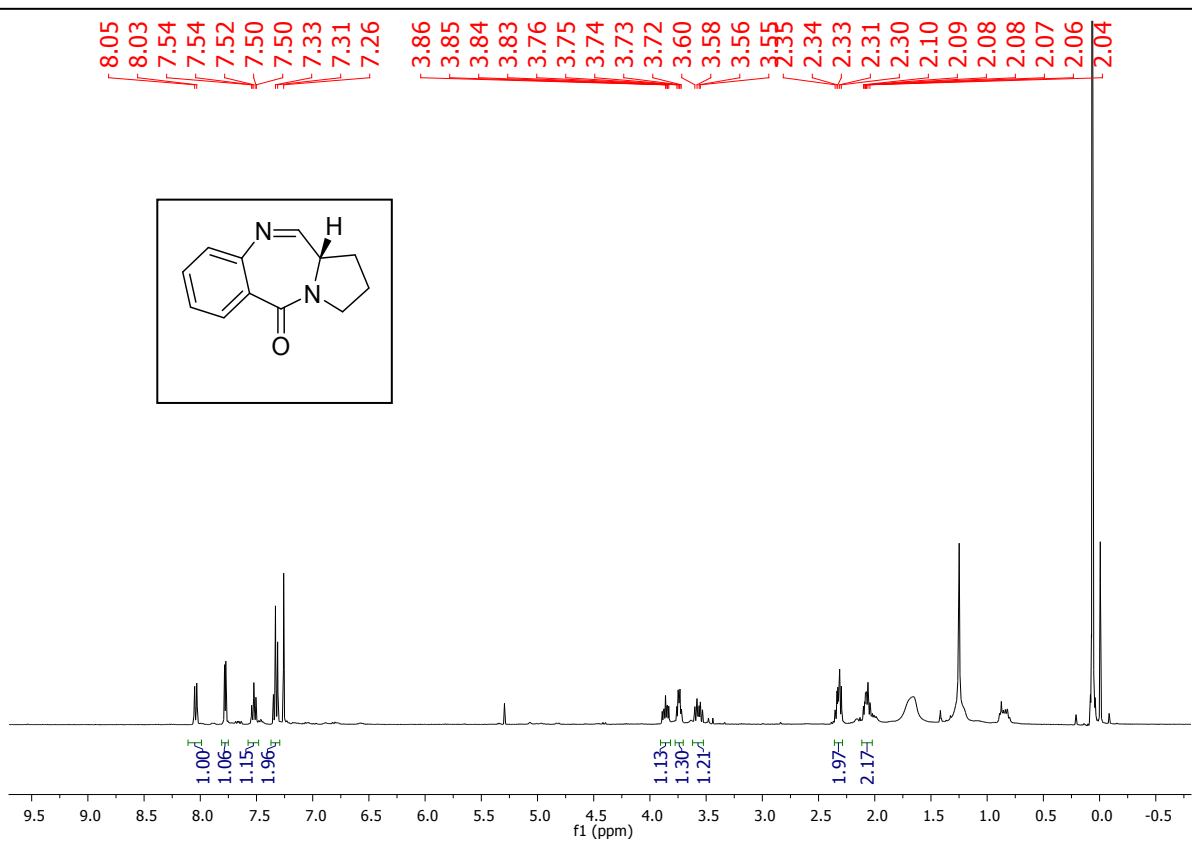

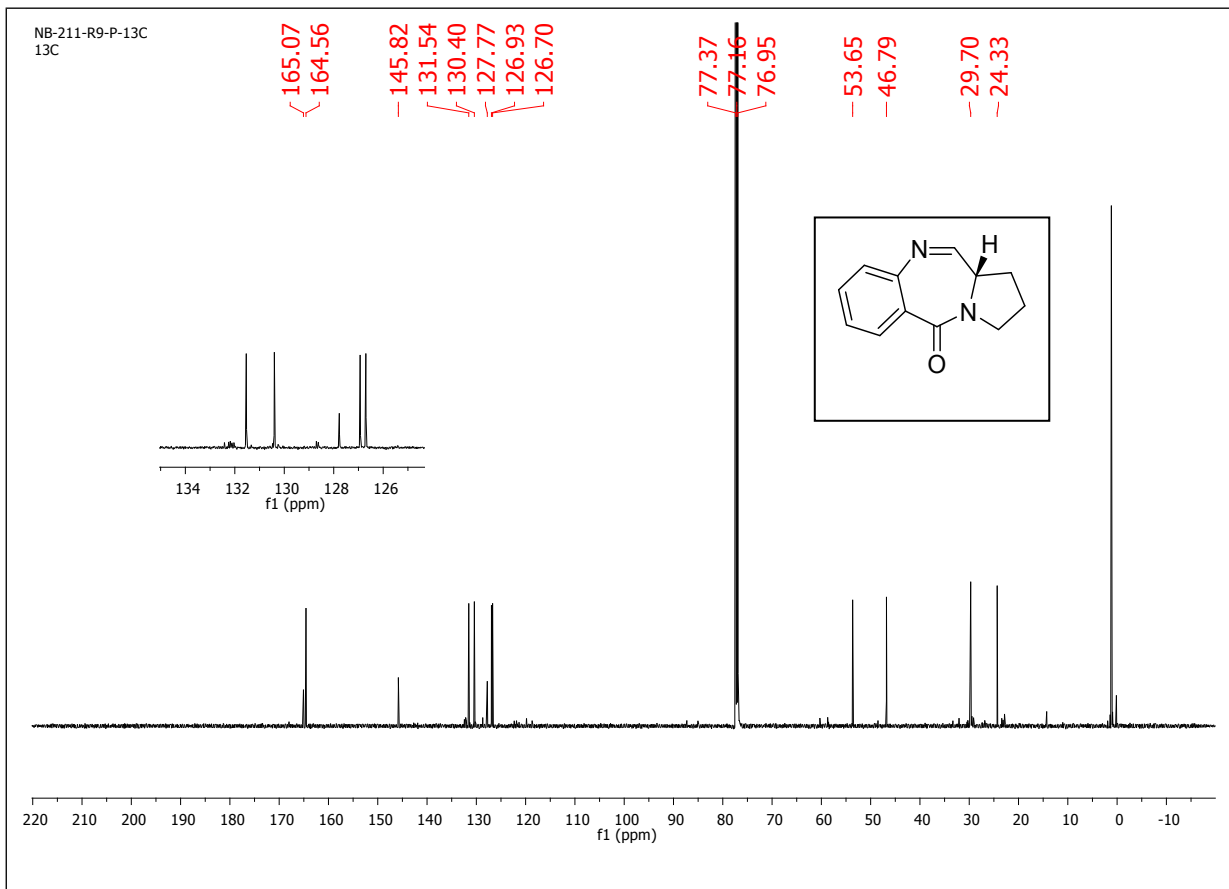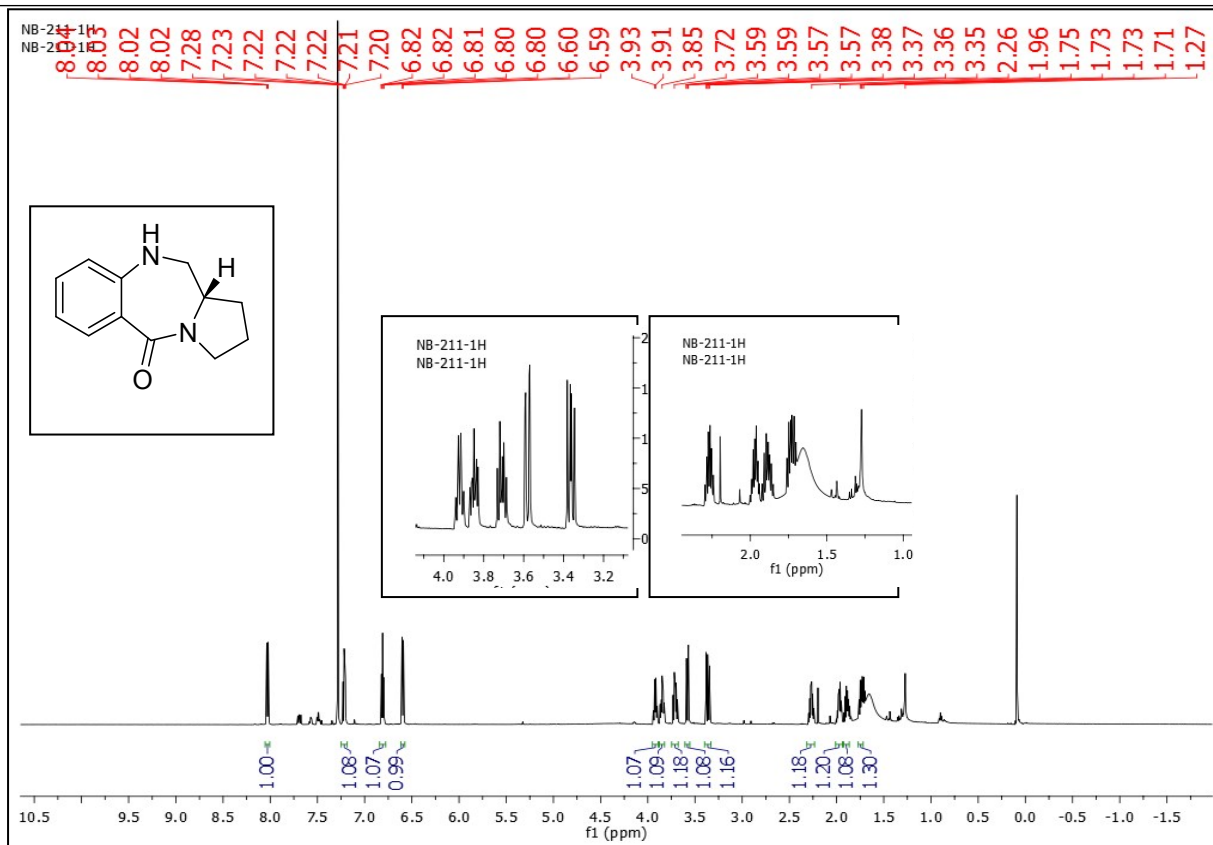

NB-211-13C  
NB-211-13C

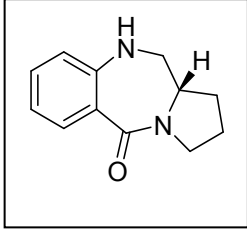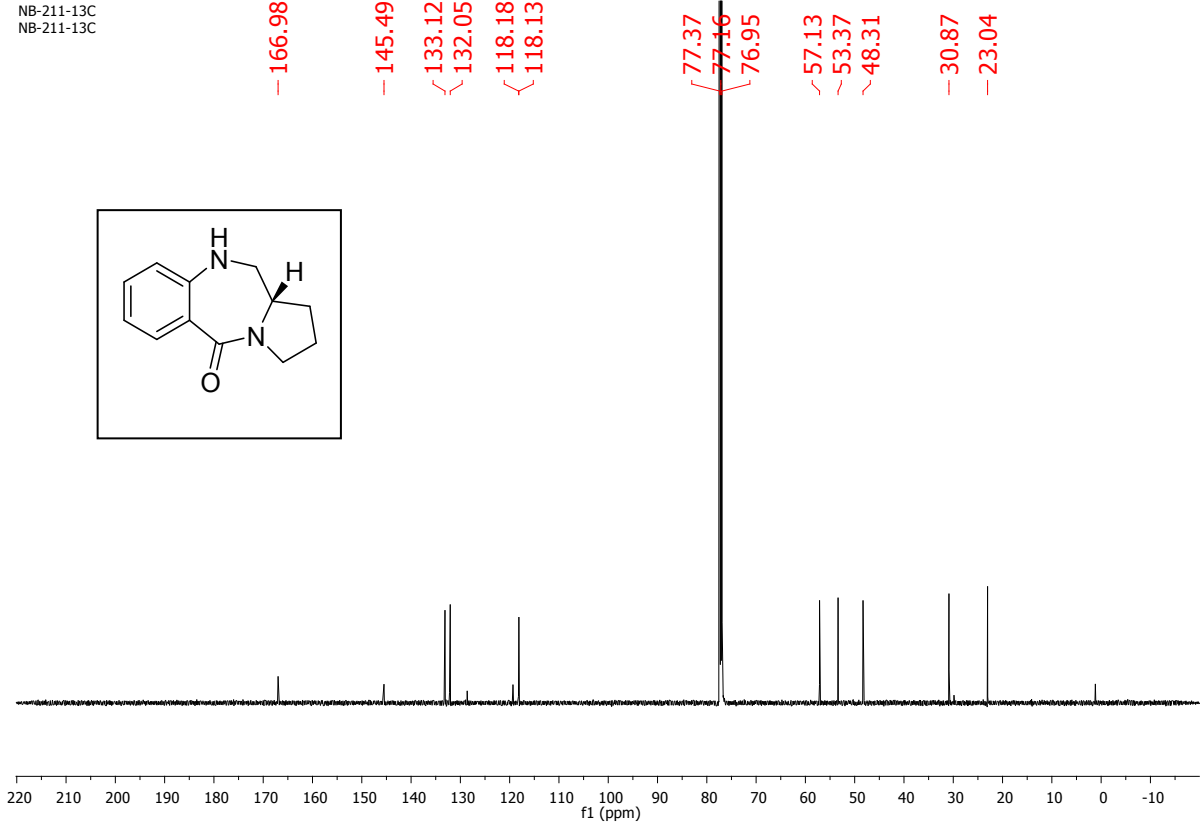

NB-01-01-P-1H  
NB-01-01-P-1H

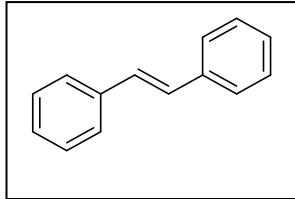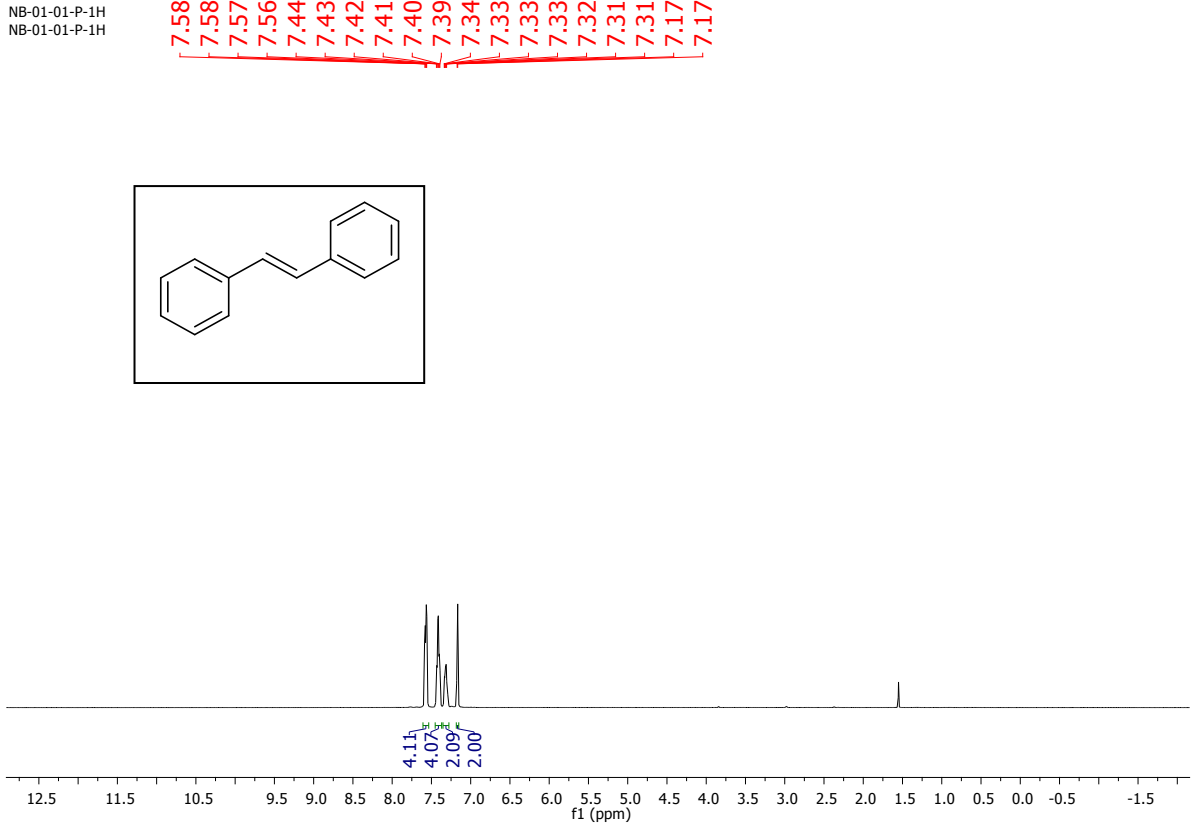



NB-01-01-P-13C  
NB-01-01-P-13C

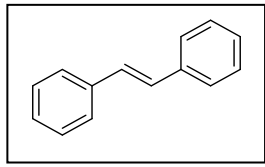

137.49  
128.86  
128.82  
127.75  
126.66

77.48  
77.16  
76.84

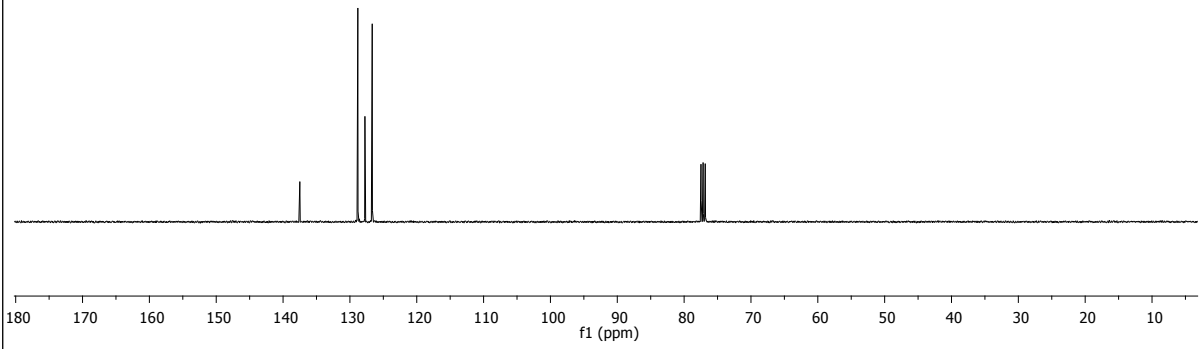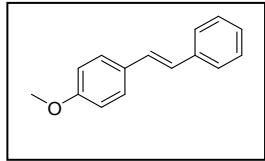

7.51  
7.49  
7.47  
7.46  
7.37  
7.35  
7.34  
7.26  
7.26  
7.24  
7.09  
7.06  
7.00  
6.97  
6.92  
6.90

3.84

4.00  
1.99  
1.35  
2.18  
2.00

3.00

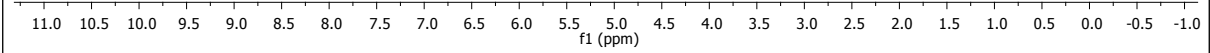

NB-01-003-UP-13C  
13C

159.39  
137.75  
128.78  
128.31  
127.84  
126.71  
124.24  
77.37  
77.16  
76.95  
55.47

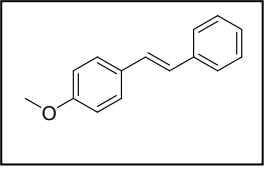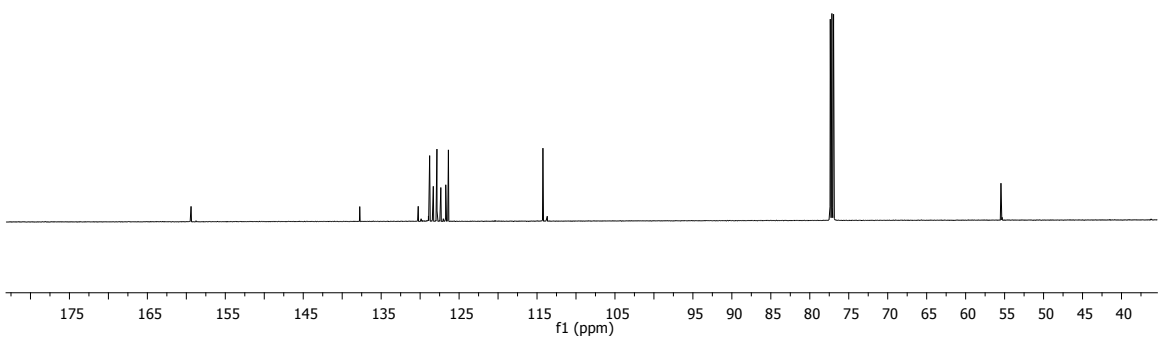

NB-01-003-UP-13C  
13C

7.4427  
7.4397  
7.4214  
7.4146  
7.4100  
7.3979  
7.3932  
7.3125  
7.3078  
7.2905  
7.2700  
7.2192  
7.2009  
7.1833  
7.0462  
7.0411  
7.0055  
6.9756  
6.9348

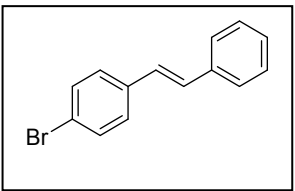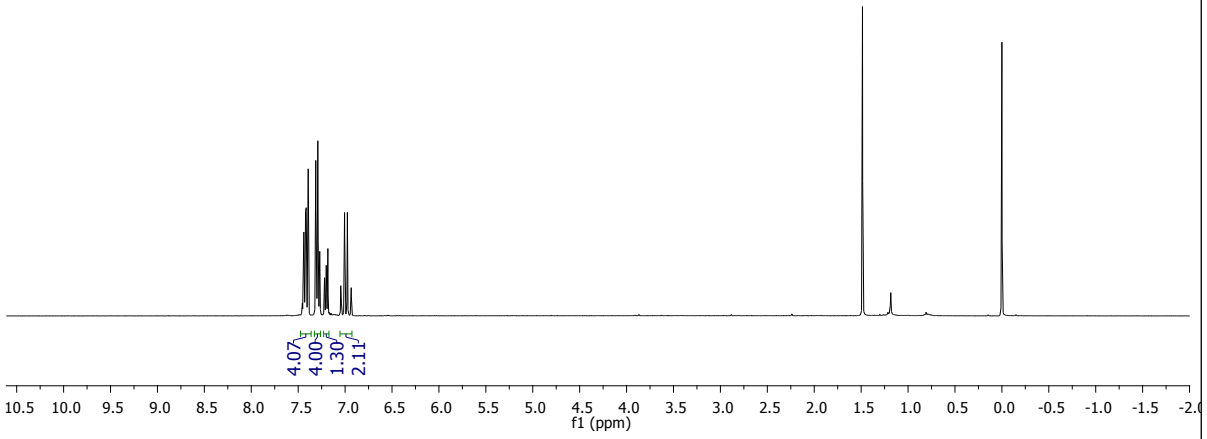

NB-01-13-P-13C  
NB-01-13-P-13C

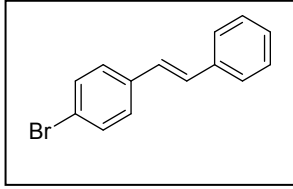

137.11  
136.45  
131.93  
129.59  
128.89  
128.12  
128.05  
127.56  
126.71  
121.46  
77.48  
77.16  
76.84

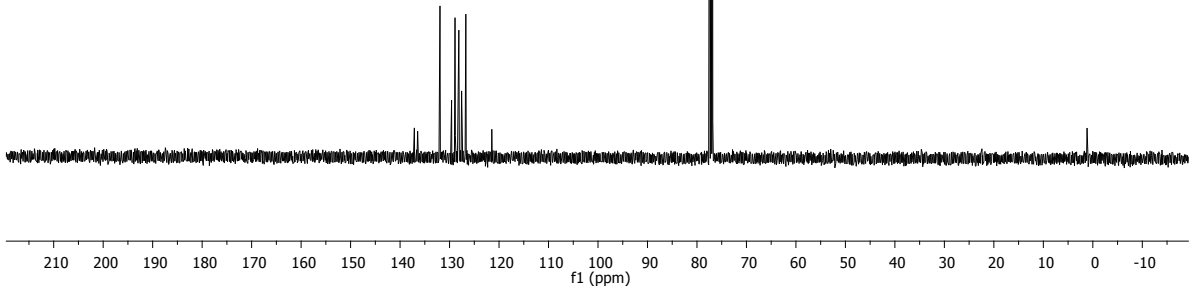

NB-01-27-P-1H  
NB-01-27-P-1H

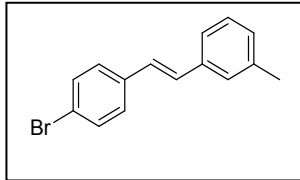

7.40  
7.38  
7.30  
7.28  
7.24  
7.22  
7.19  
7.18  
7.17  
7.03  
7.01  
7.01  
6.97  
6.95  
6.91  
- 2.30

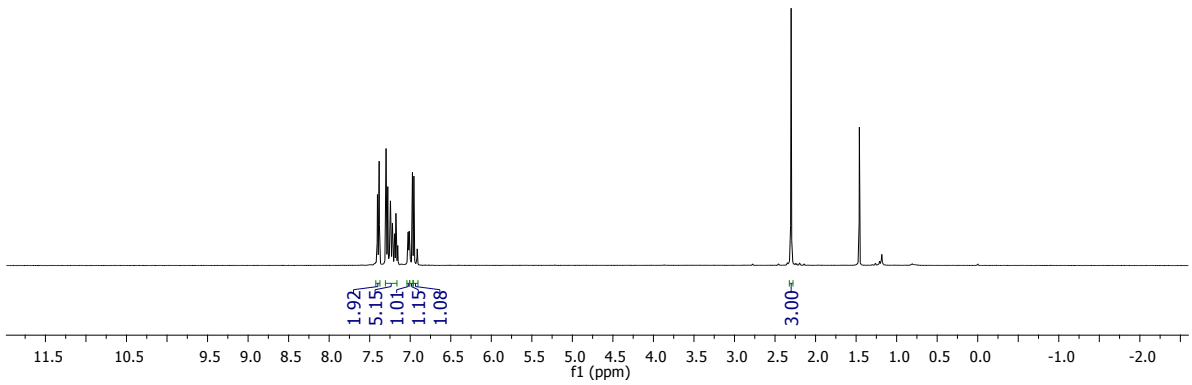

NB-01-27-P-13C  
NB-01-27-P-13C

138.45  
137.06  
136.56  
131.92  
129.72  
128.89  
128.78  
128.09  
127.41  
127.36  
123.92  
121.37

77.48  
77.16  
76.84

-21.56

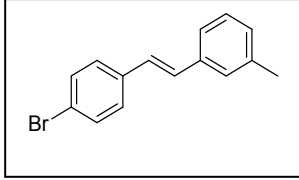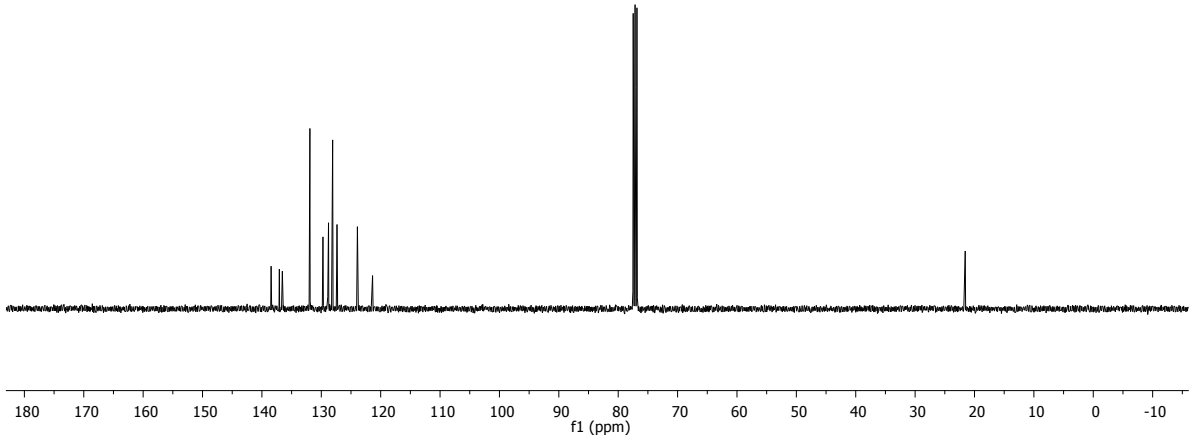

NB-01-24-P-1H  
NB-01-24-P-1H

7.49  
7.47  
7.34  
7.33  
7.31  
7.28  
7.24  
7.22  
7.21  
7.06

-2.35

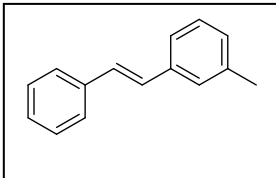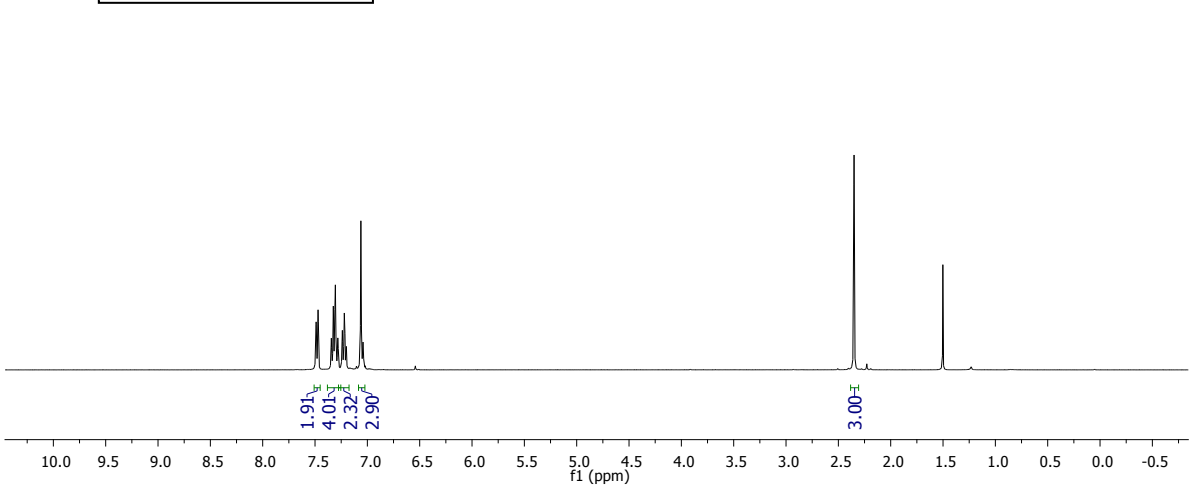

NB-01-24-P-13C  
NB-01-24-P-13C

138.36  
137.61  
137.44  
128.98  
128.81  
128.72  
128.66  
128.60  
127.68  
127.36  
126.63  
123.86

77.48  
77.16  
76.84

-21.57

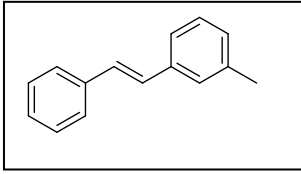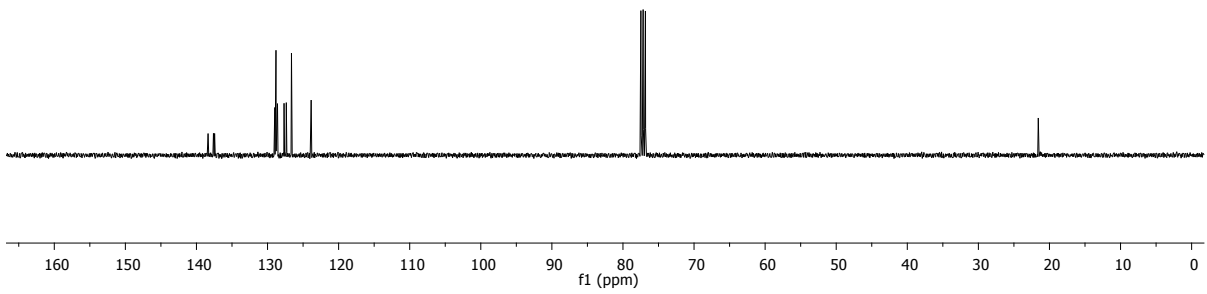

NB-01-33-P-1H  
NB-01-33-P-1H

7.43  
7.41  
7.33  
7.31  
7.27  
7.25  
7.23  
7.19  
7.17  
7.12  
7.08  
7.07  
7.06  
7.02

2.39  
2.37

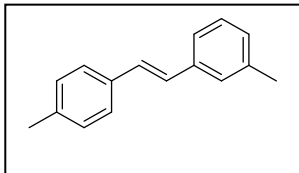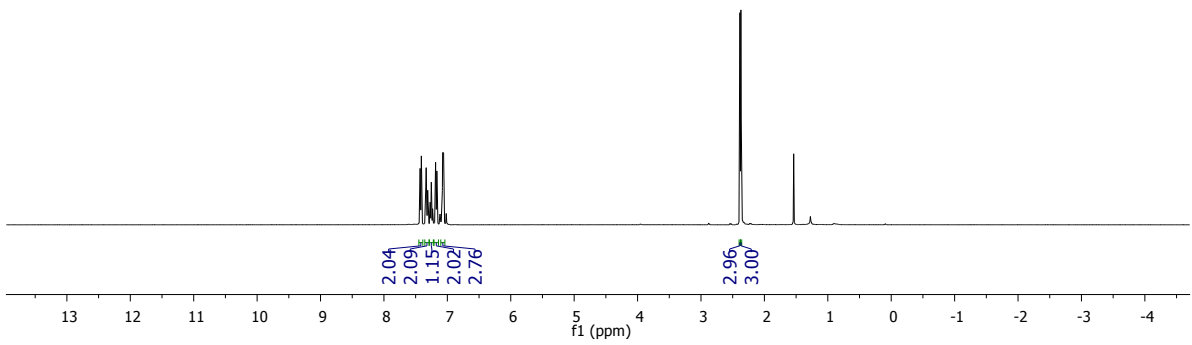

NB-01-33-P-13C  
NB-01-33-P-13C

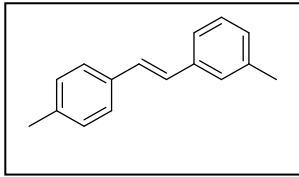

138.32  
137.63  
137.56  
134.83  
129.53  
128.69  
128.59  
128.38  
127.99  
127.25  
126.55  
123.74

77.48  
77.16  
76.84

21.57  
21.37

180 170 160 150 140 130 120 110 100 90 80 70 60 50 40 30 20 10 0  
f1 (ppm)

7.50  
7.40  
7.38  
7.38  
7.33  
7.33  
7.29  
7.28  
7.27  
7.25  
7.25  
7.19  
7.18  
7.17  
7.17  
7.15  
6.99  
6.95  
6.84  
6.80  
6.36  
6.35  
6.35  
6.34  
6.28  
6.28

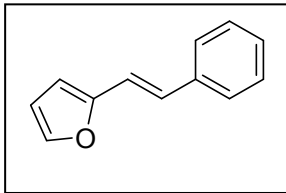

6.37  
0.98  
1.00

0.85  
0.91

10.0 9.5 9.0 8.5 8.0 7.5 7.0 6.5 6.0 5.5 5.0 4.5 4.0 3.5 3.0 2.5 2.0 1.5 1.0 0.5 0.0 -0.5 -1.0 -1.5 -2.0  
f1 (ppm)

NB-01-23-P-13C  
NB-01-23-P-13C

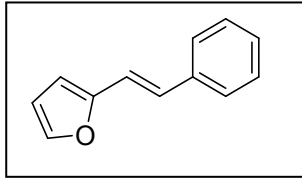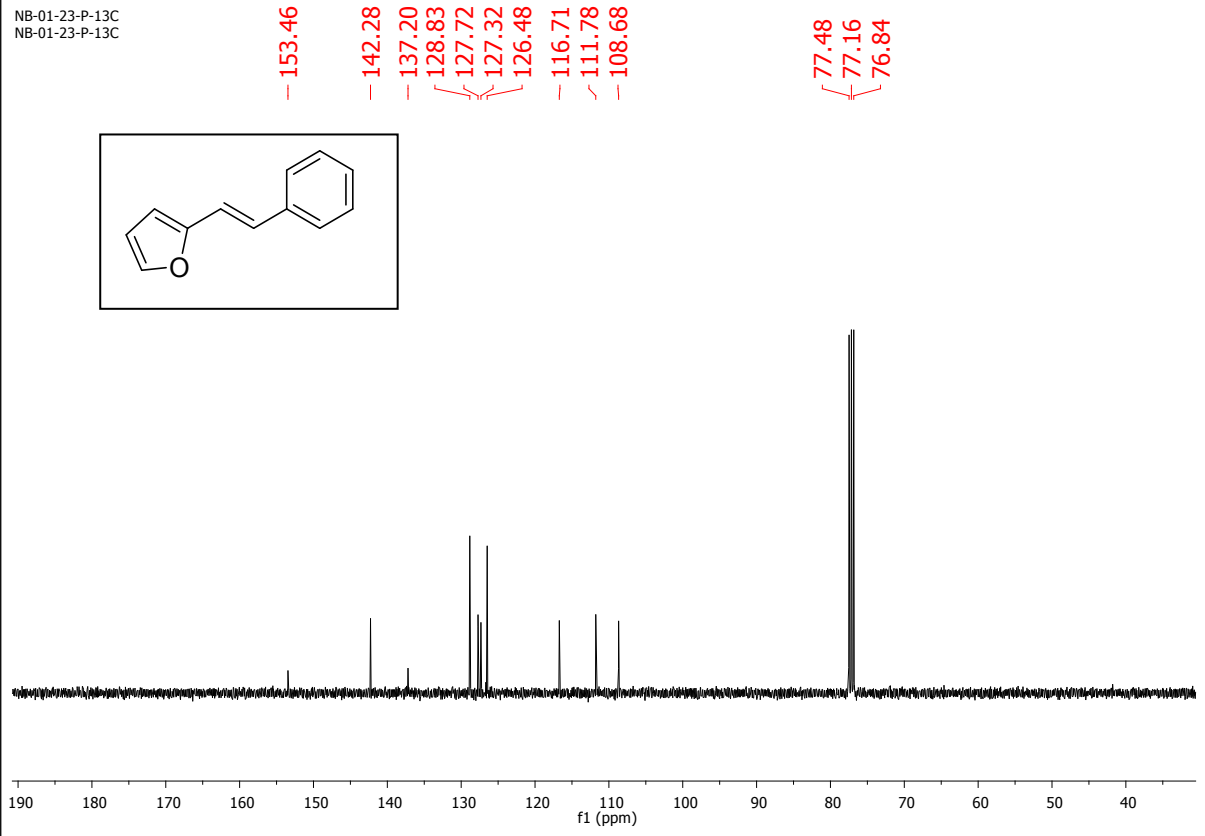

NB-01-31-P-1H  
NB-01-31-P-1H

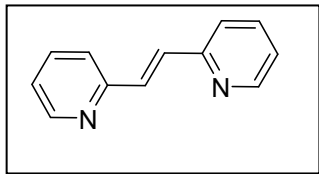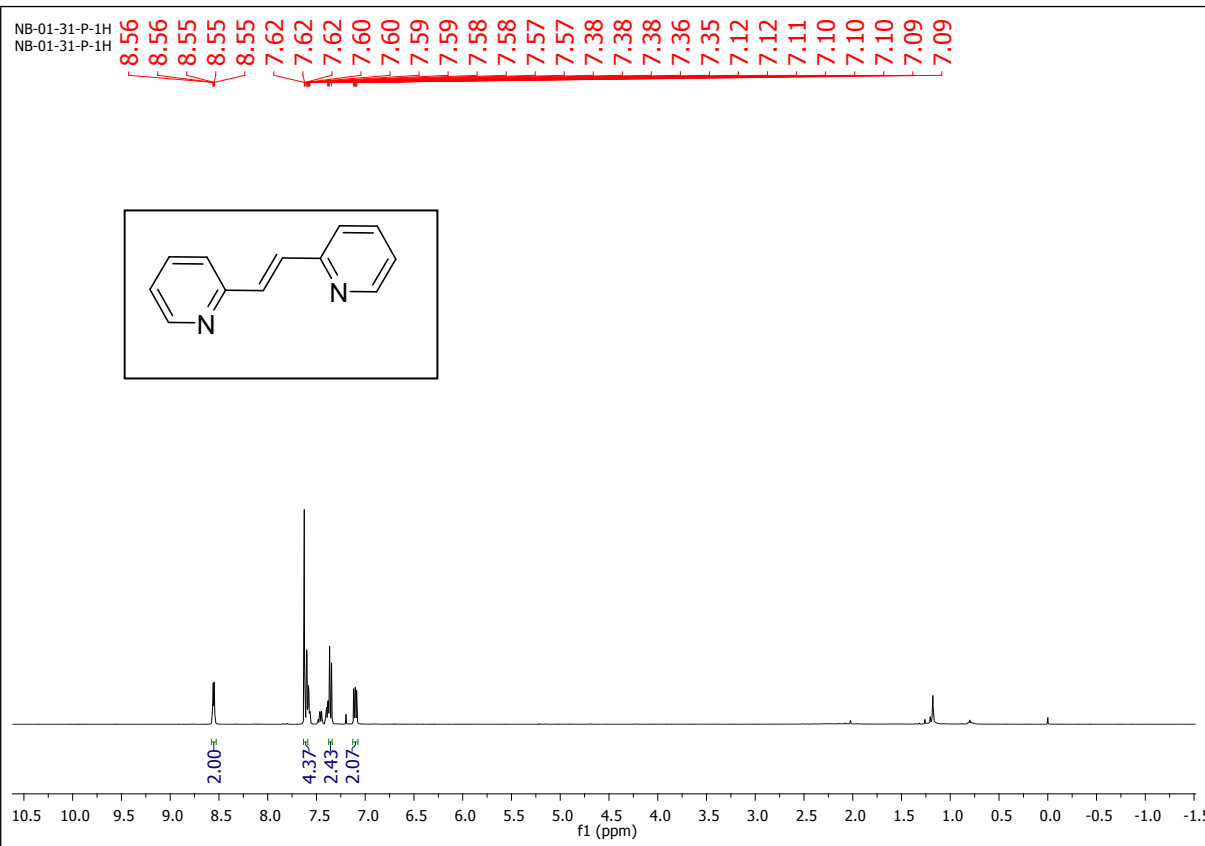

NB-01-31-P-13C  
NB-01-31-P-13C

155.14  
149.87  
136.77  
131.89  
123.40  
122.77  
77.48  
77.16  
76.84

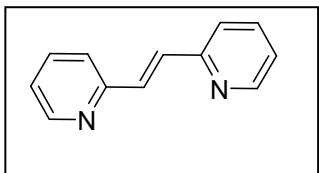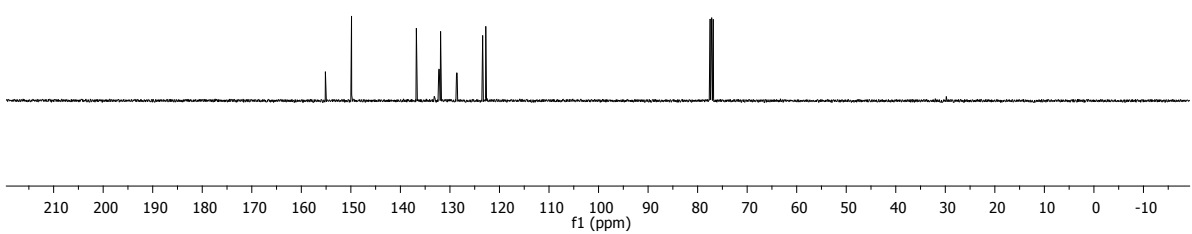

NB-01-32-P-1H  
NB-01-32-P-1H

7.54  
7.52  
7.40  
7.38  
7.37  
7.36  
7.36  
7.31  
7.29  
7.28  
7.27  
7.26  
7.25  
6.85  
6.48  
2.29  
2.21

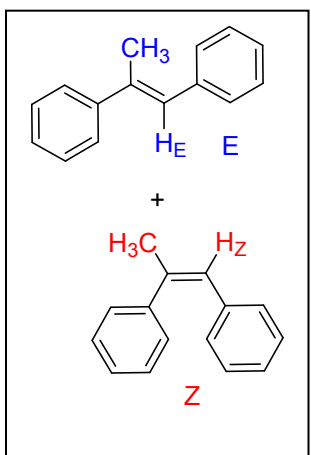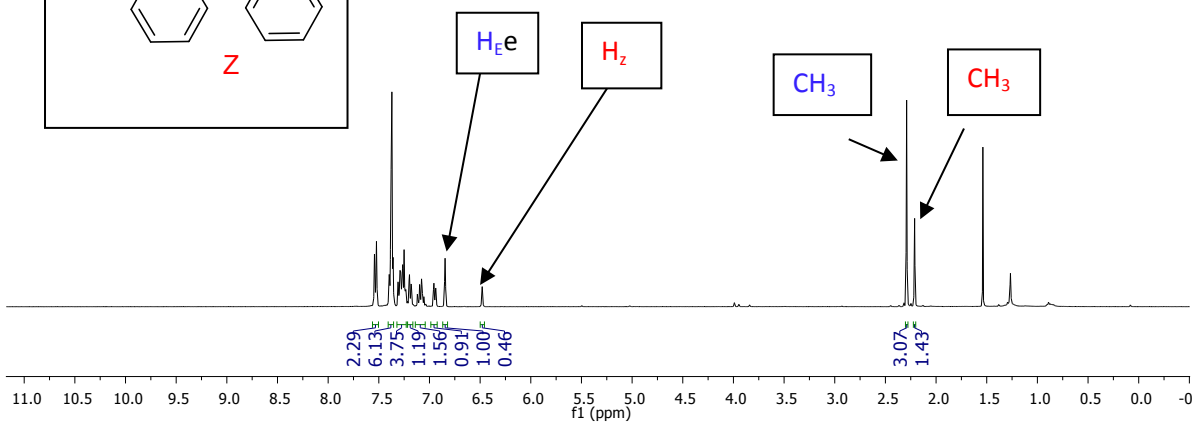



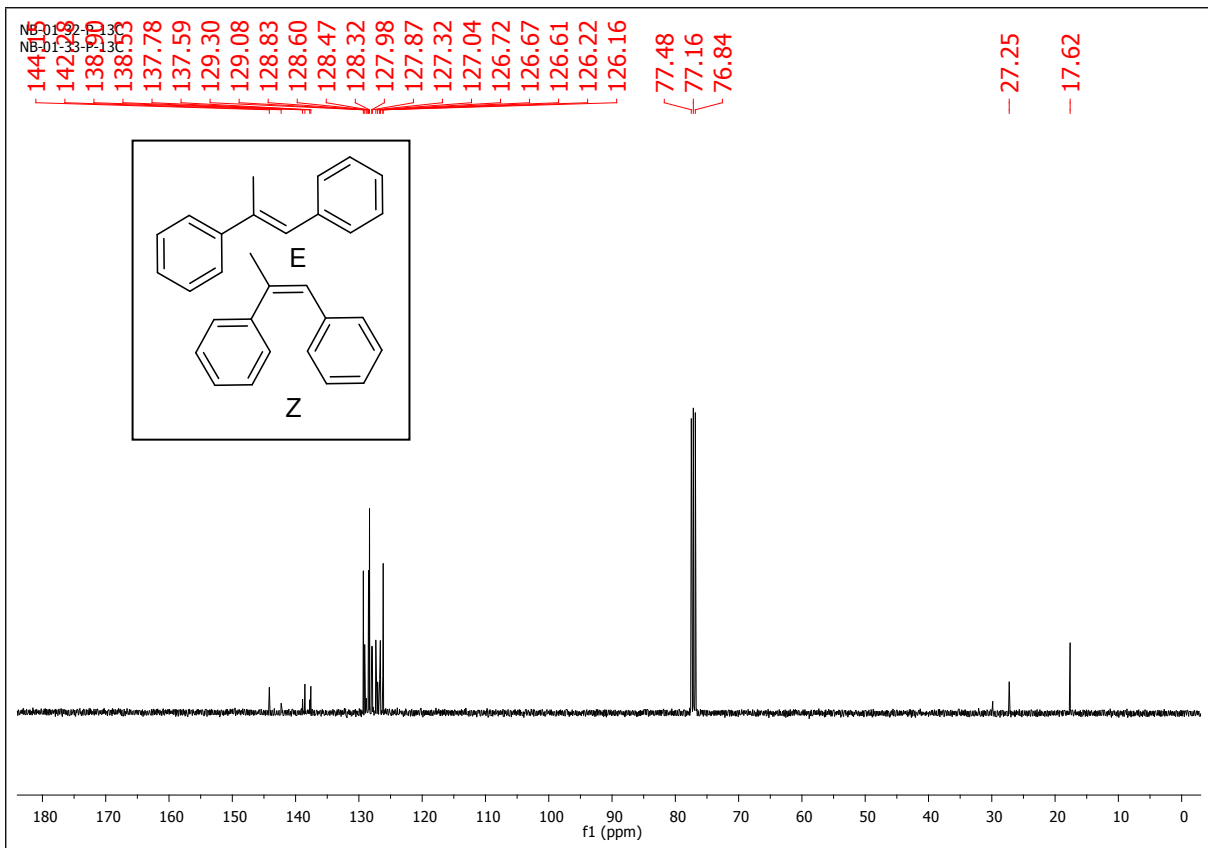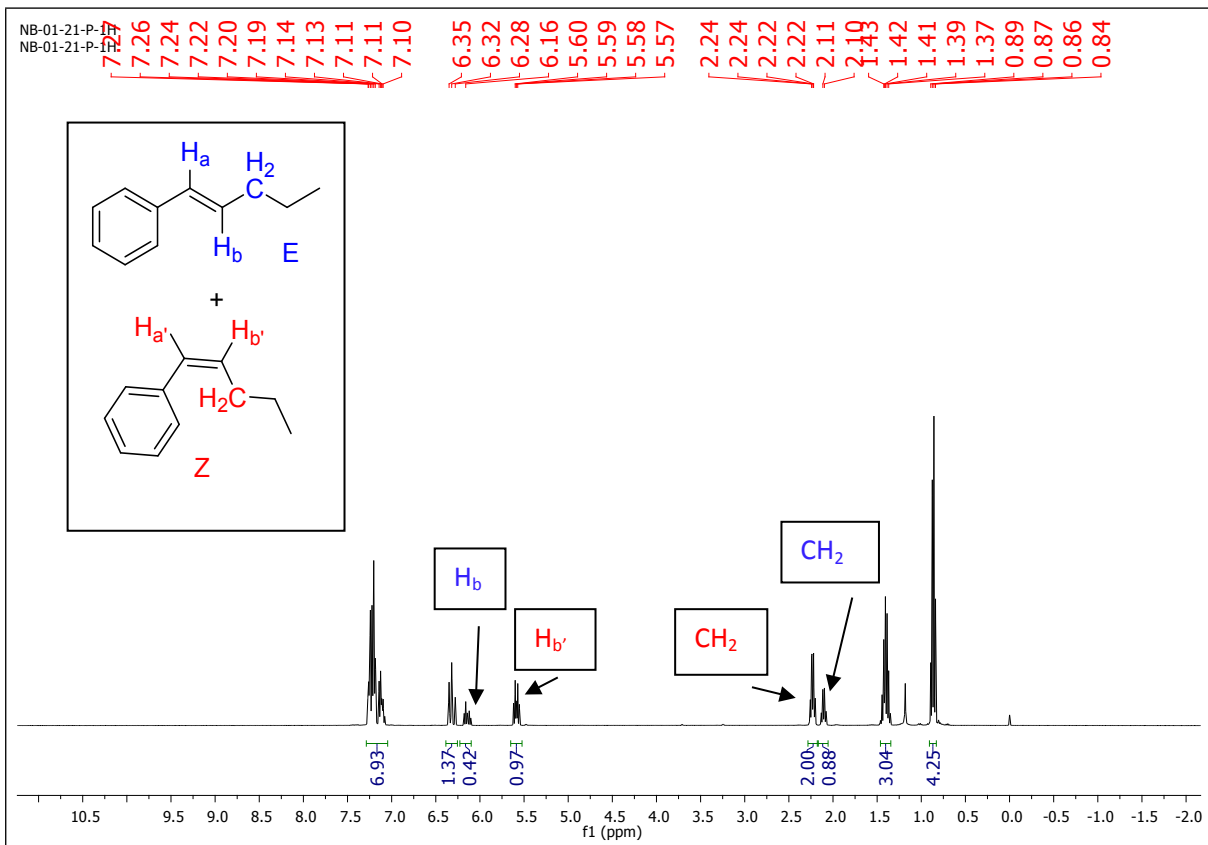

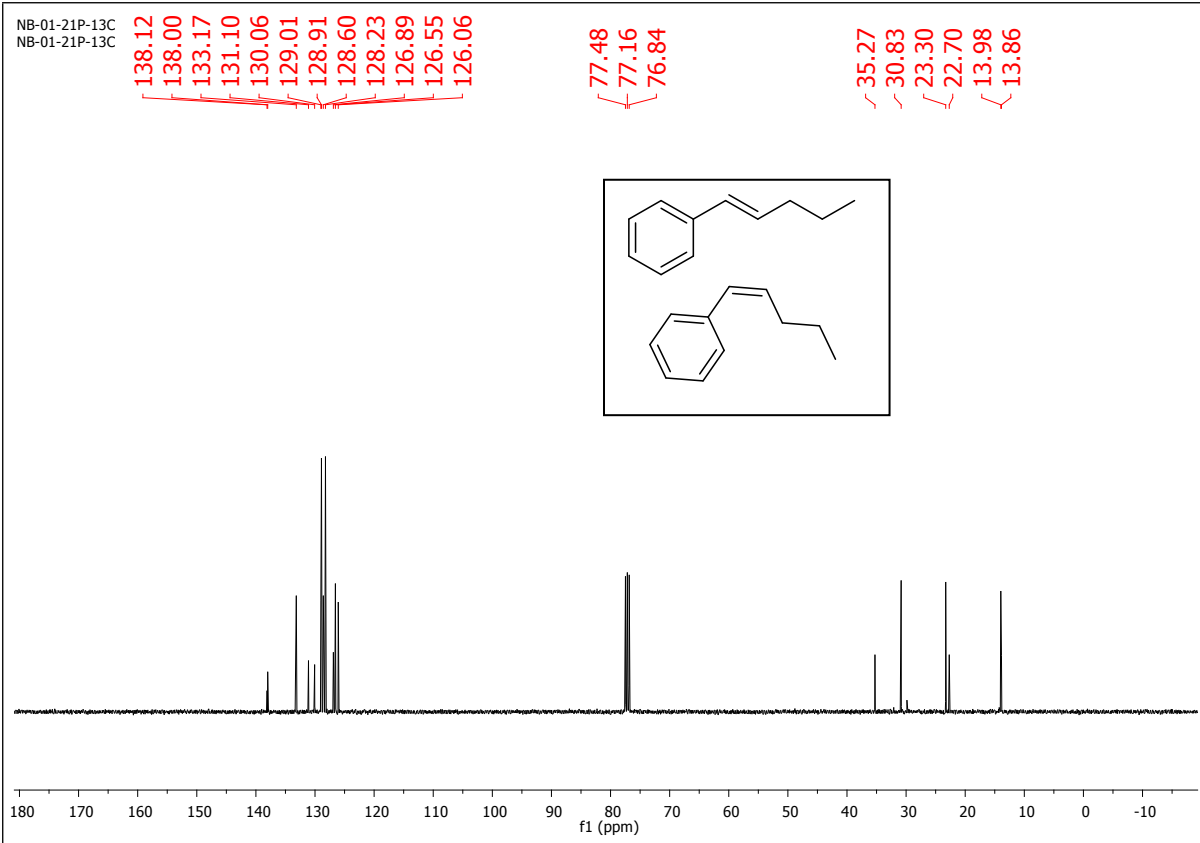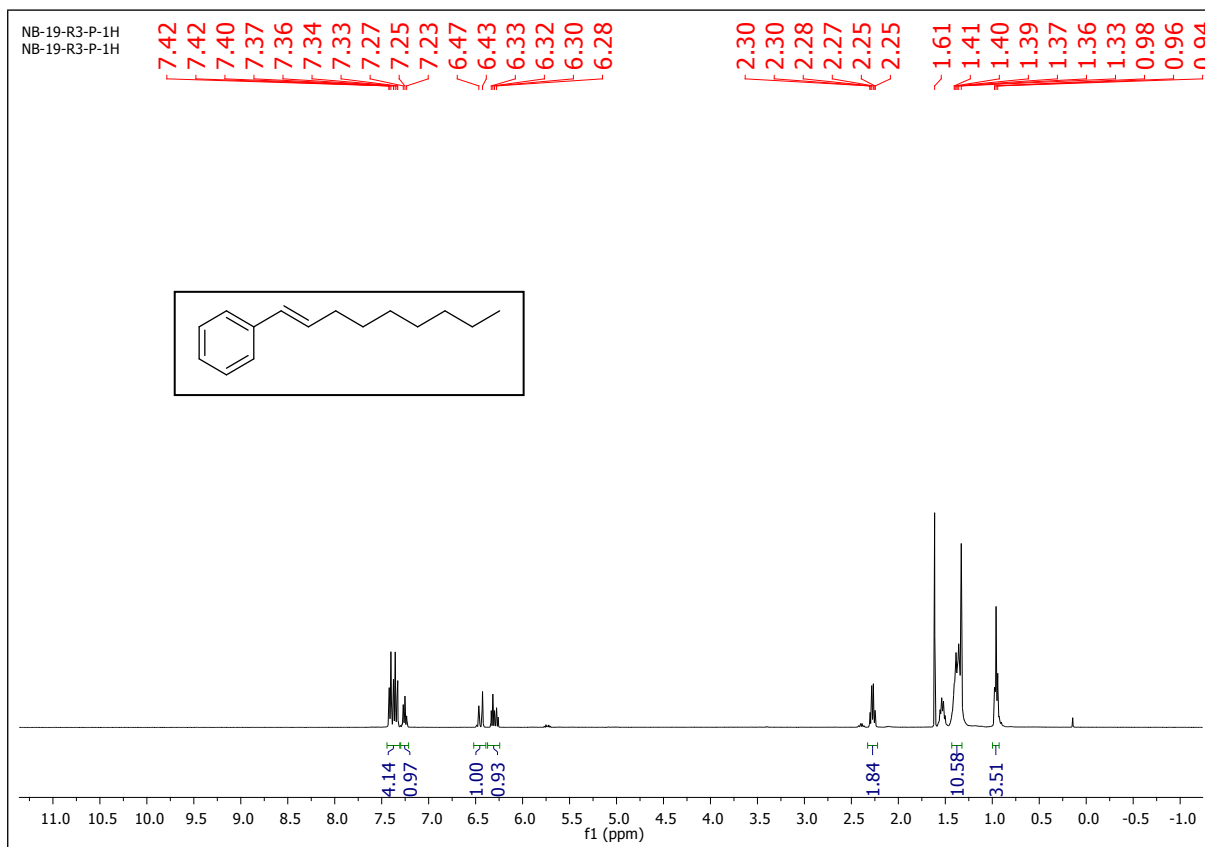

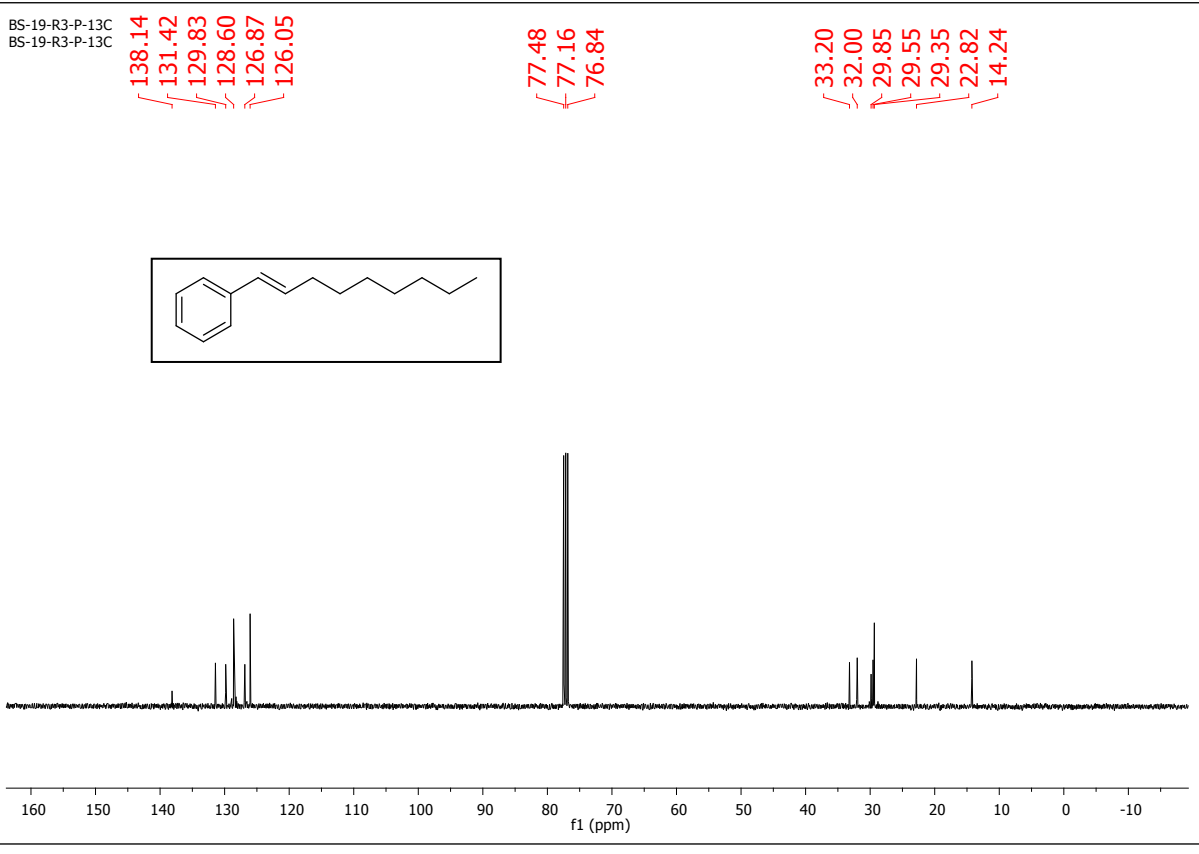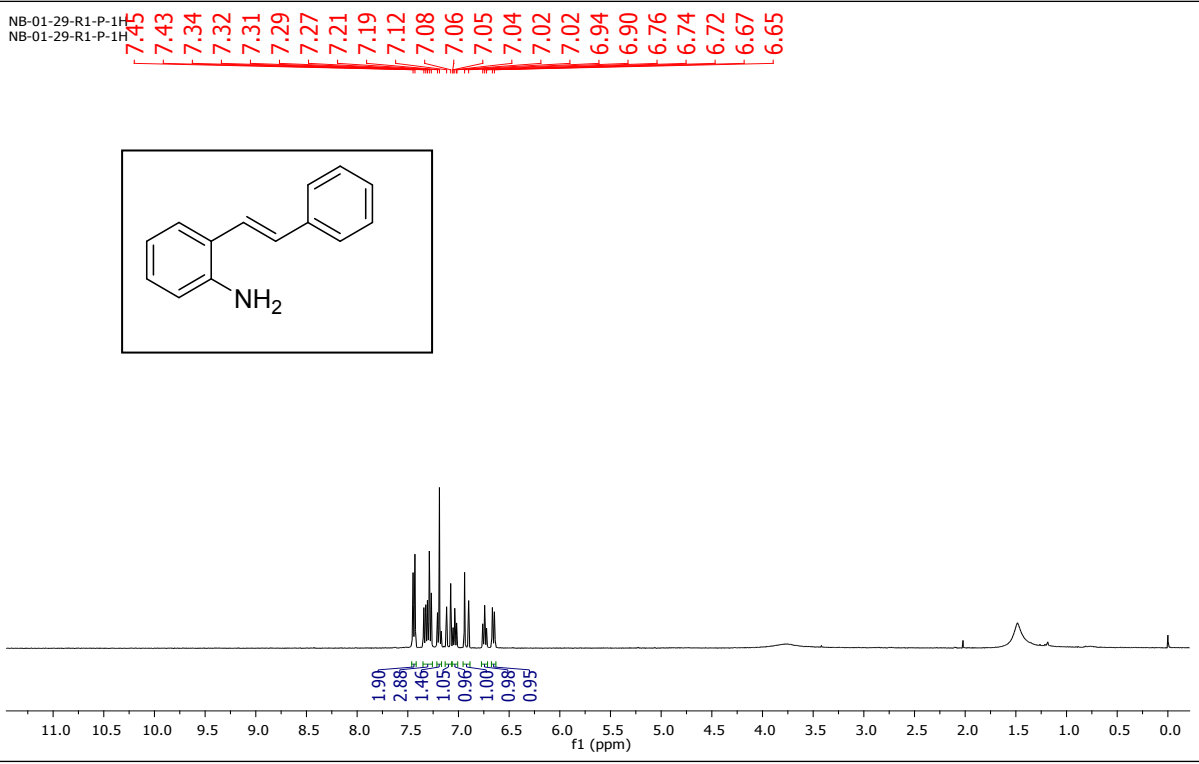

B-01-29-R1-P-13C  
B-01-29-R1-P-13C

144.14  
137.81  
130.53  
128.85  
128.83  
127.72  
127.43  
126.59  
124.47  
124.05  
119.33  
116.41

77.48  
77.16  
76.84

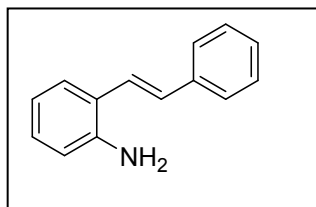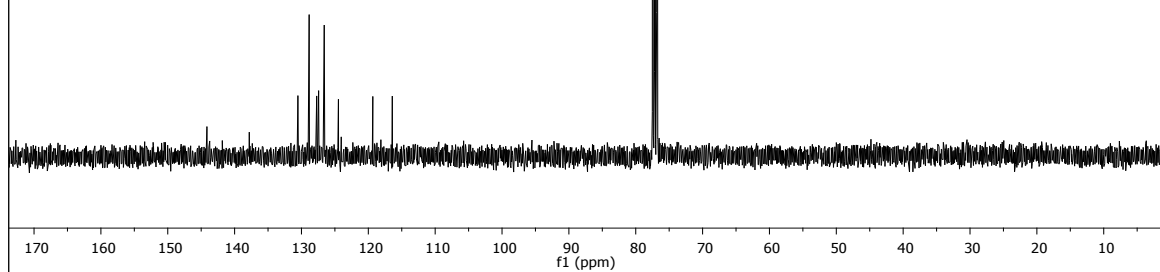

Supplement: c8dt04725a1.pdf [file c8dt04725a1.pdf]
